# Supplementary material for: Are Small Nucleolar RNAs “CRISPRable”? A Report on Box C/D Small Nucleolar RNA Editing in Human Cells
Source: PubMed Central journal article supplement (PMC6856654; doi:10.3389/fphar.2019.01246), 2019-11-04

JunctionSeq analysis of the dataset presented in NCBI GEO (GSE56010) (Liu et al., 2015b) confirmed that the maturation pattern for Gas5 lncRNA alters upon knockdown of METTL3, METTL14, and HNRNPC.

*Gas5* exons upon knockdown of *HNRNPC*

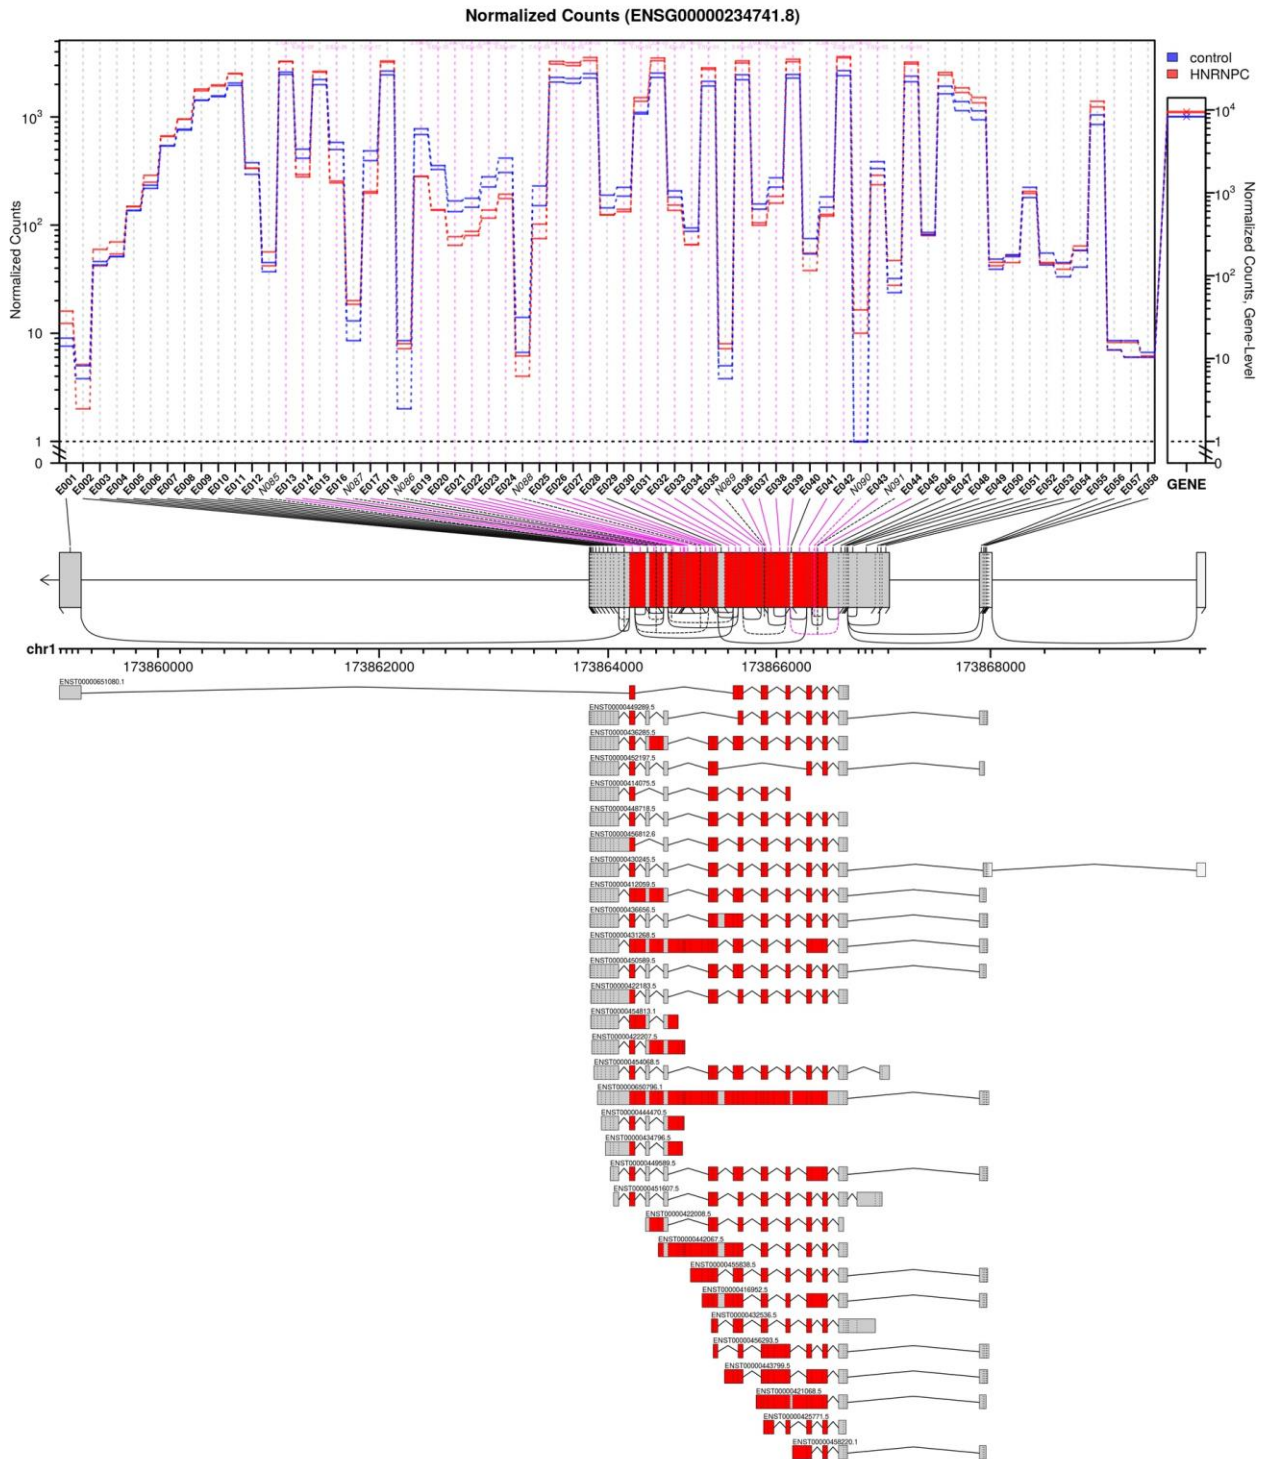

# Gas5 junctions upon knockdown of HNRNPC

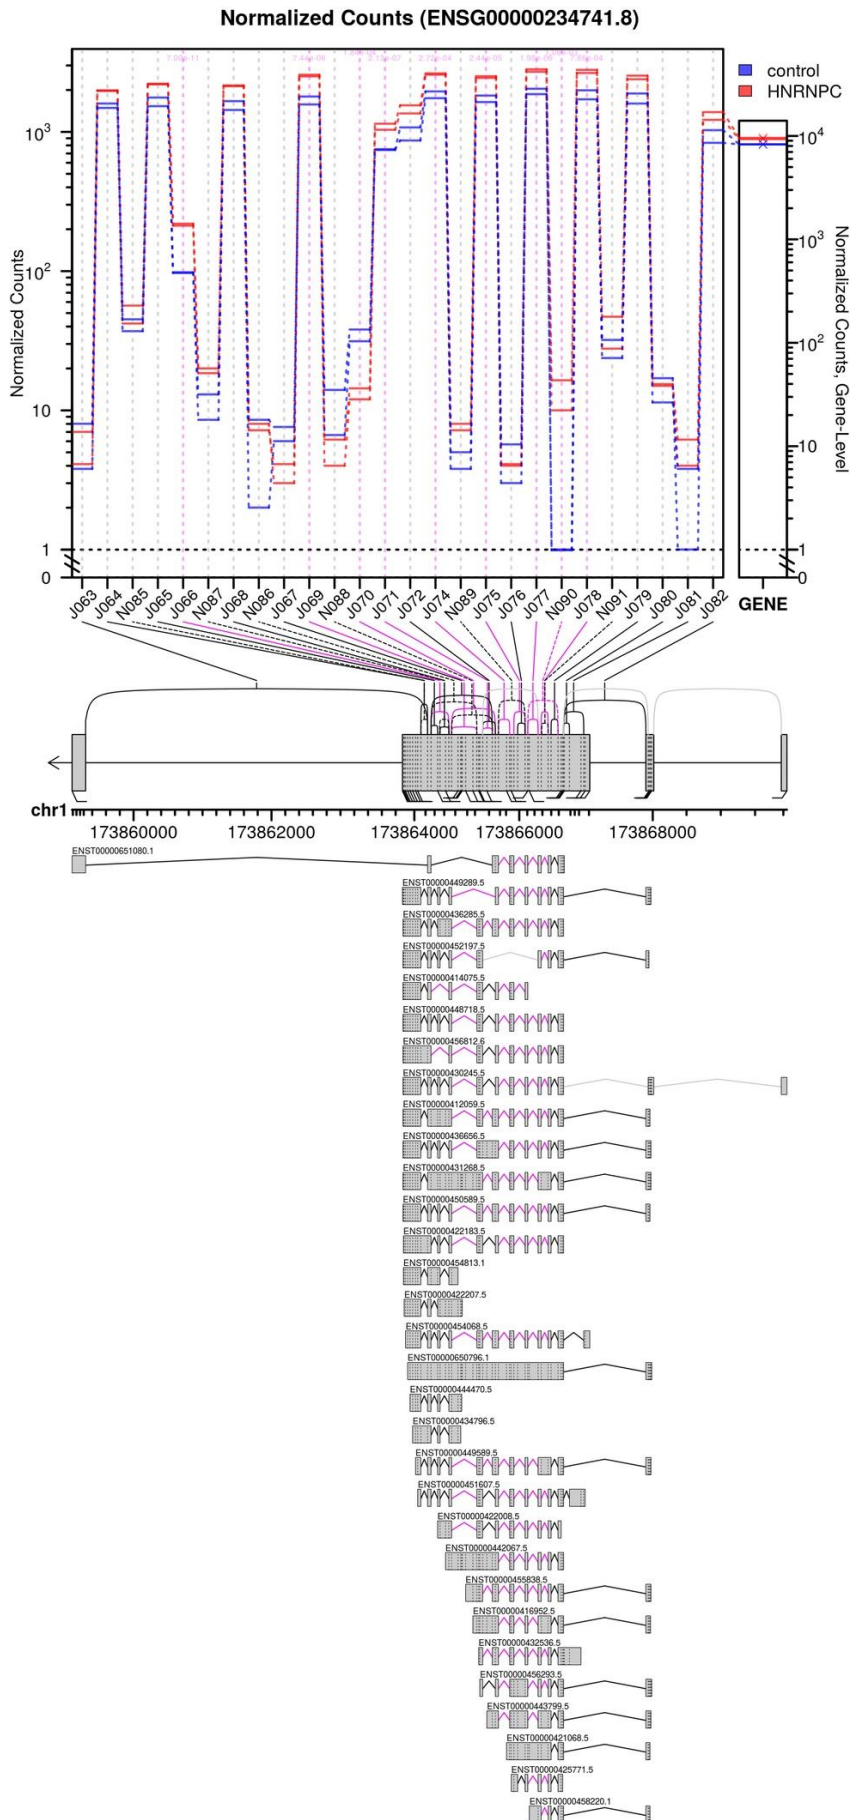

# Gas5 exons upon knockdown of *METTL3*

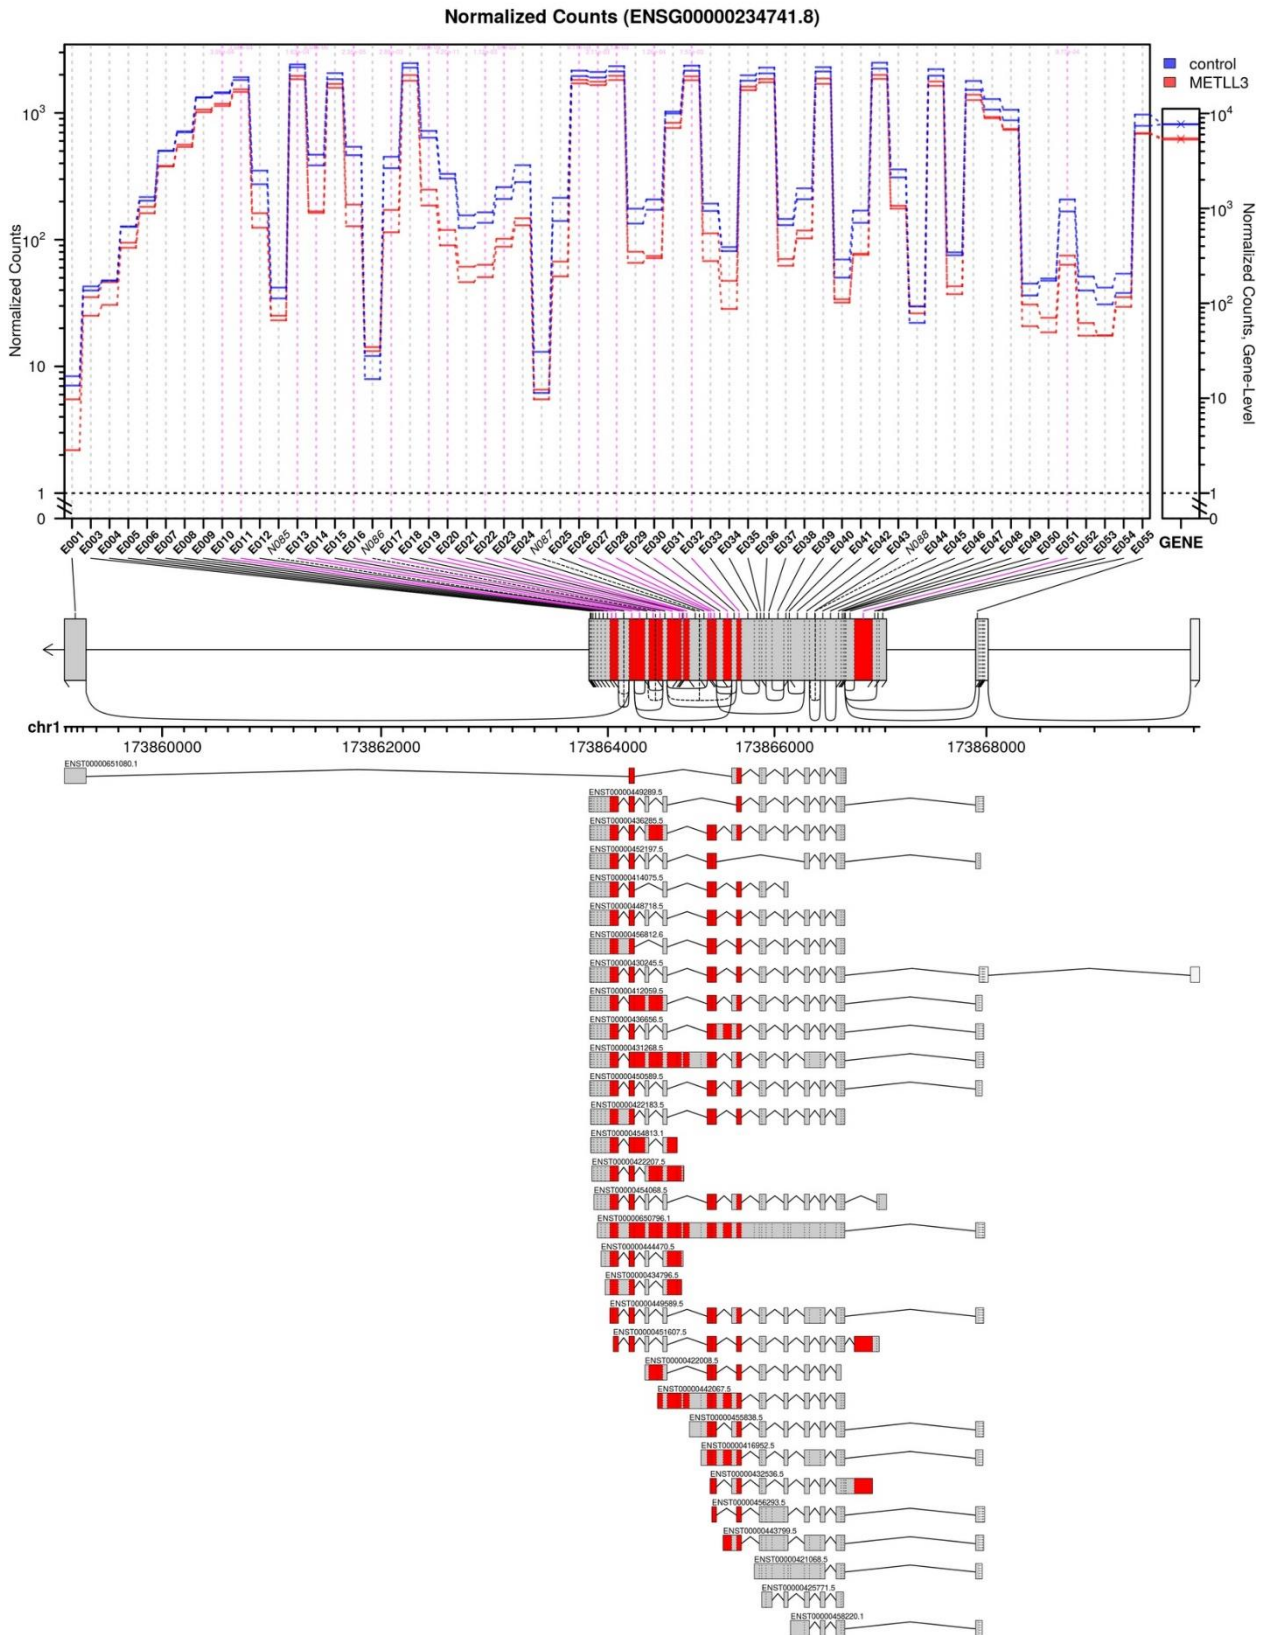

# Gas5 junctions upon knockdown of *METTL3*

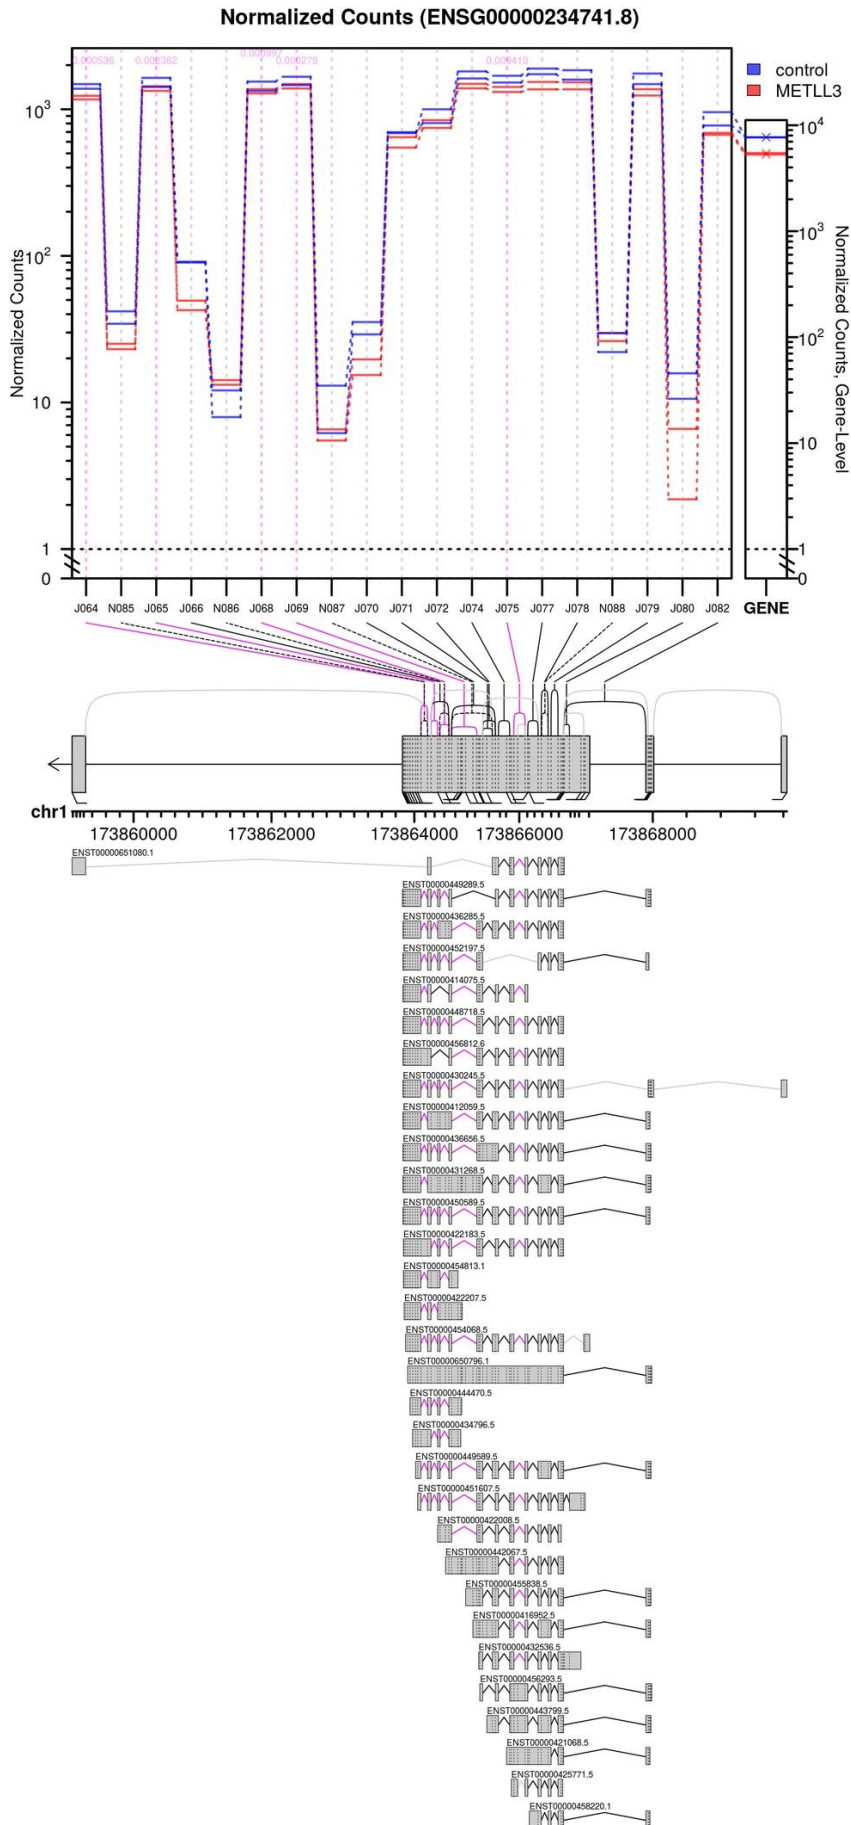

# Gas5 exons upon knockdown of METTL14

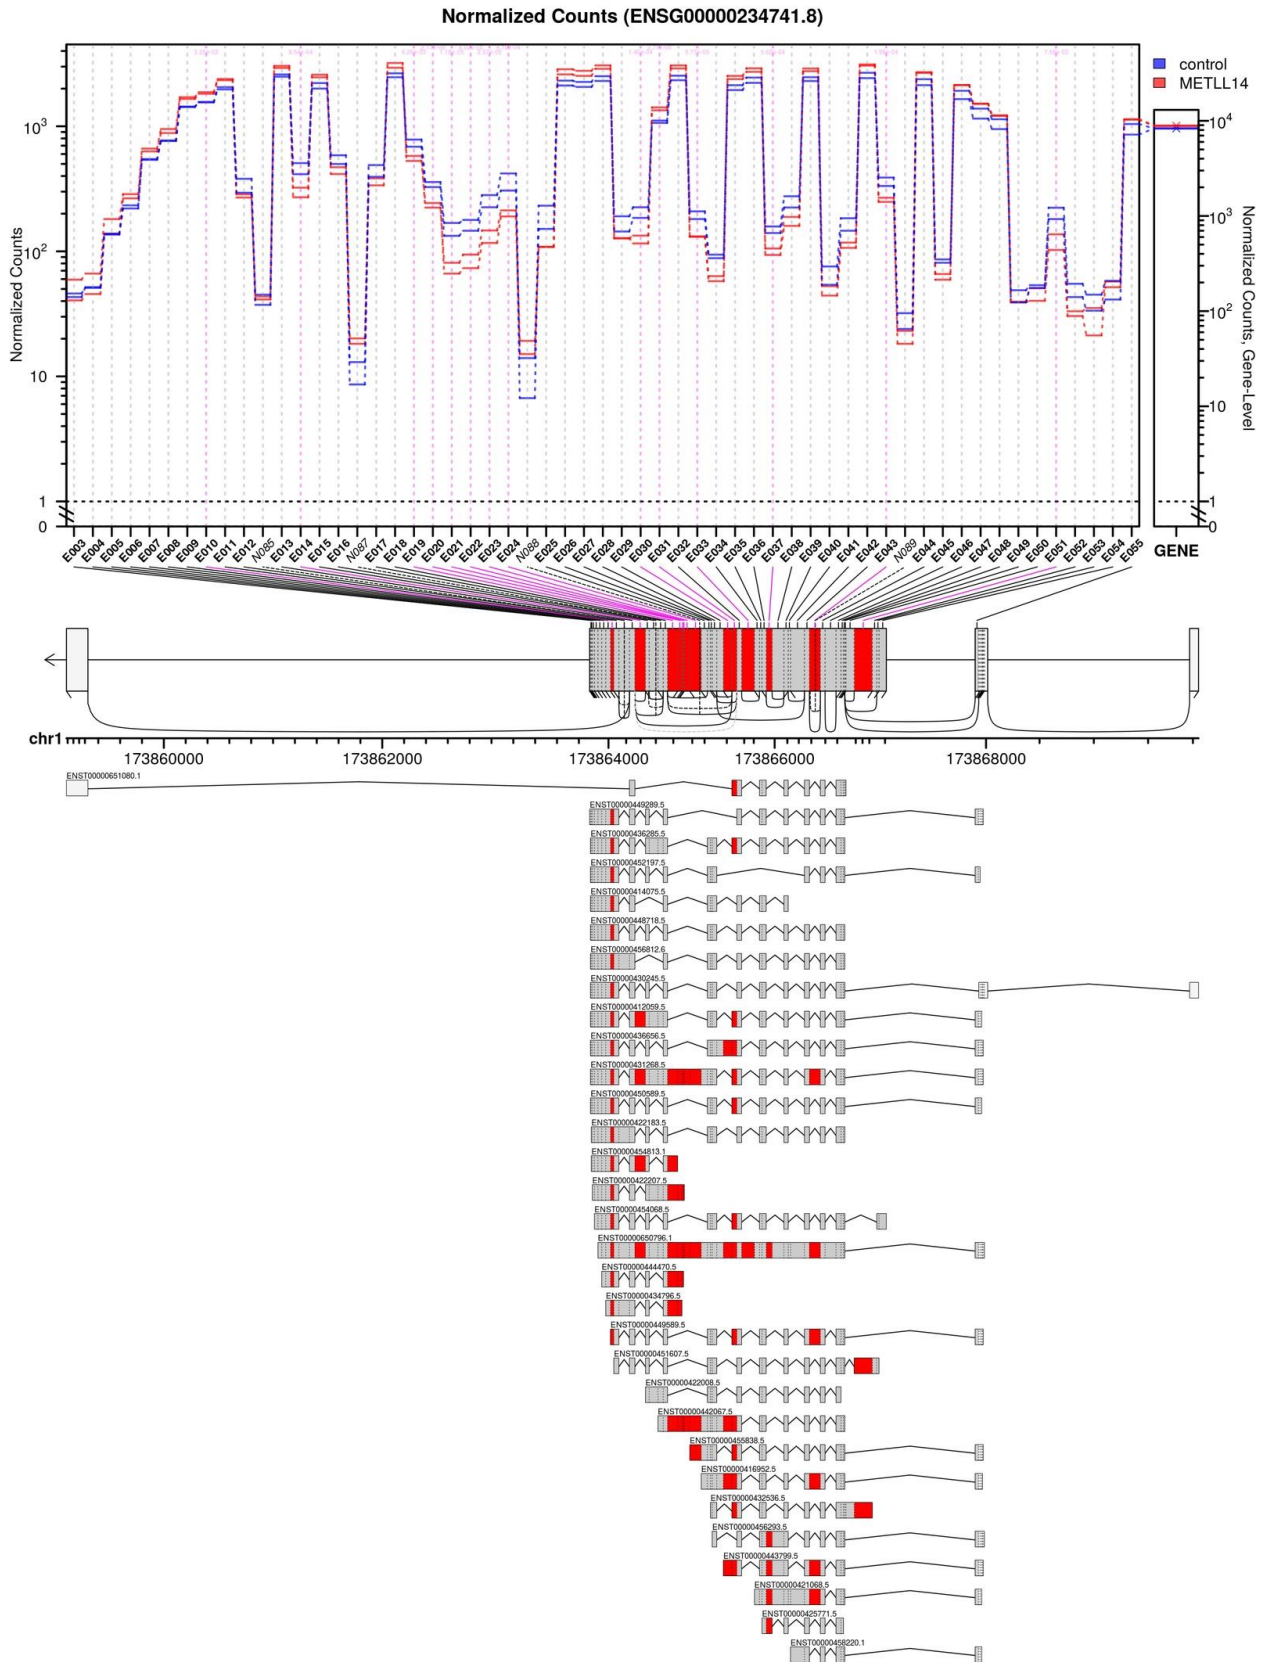

# Gas5 junctions upon knockdown of *METTL14*

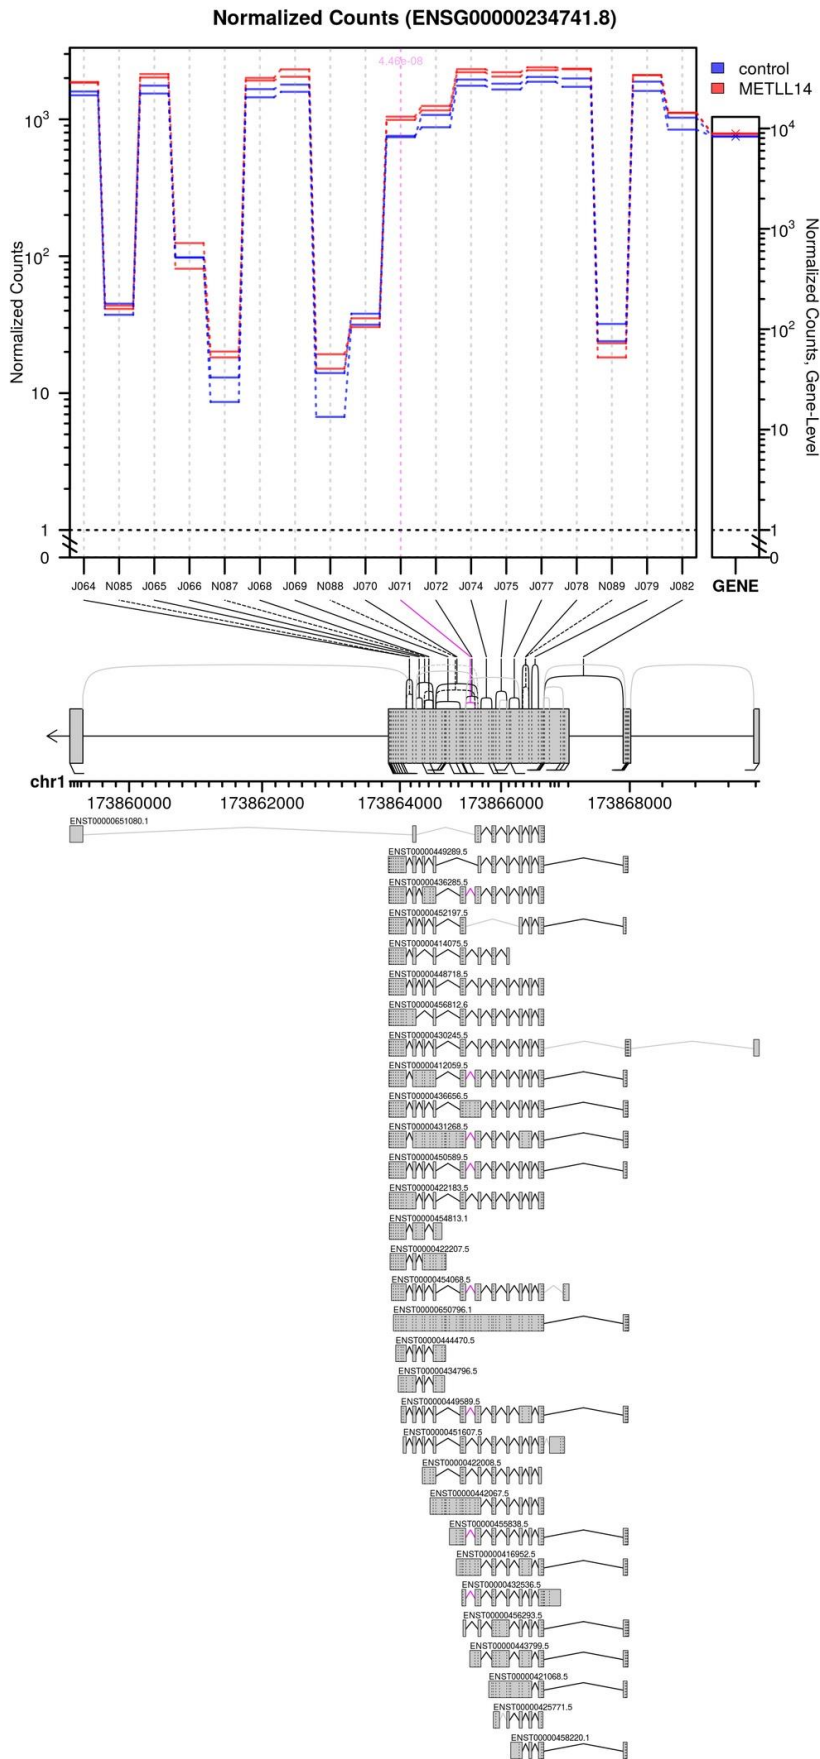

Supplement: DataSheet_1.pdf [file DataSheet_1.pdf]
