# Supplementary material for: Are Small Nucleolar RNAs “CRISPRable”? A Report on Box C/D Small Nucleolar RNA Editing in Human Cells
Source: PubMed Central journal article supplement (PMC6856654; doi:10.3389/fphar.2019.01246), 2019-11-04

Analysis of *Gas5* splicing events using JunctionSeq revealed numerous changes in the splicing pattern of *Gas5* in 293FT-75-2, while few changes were observed for the other monoclonal cell lines.

### 293FT-75-2 vs 293FT-pX

#### *Gas5* exons

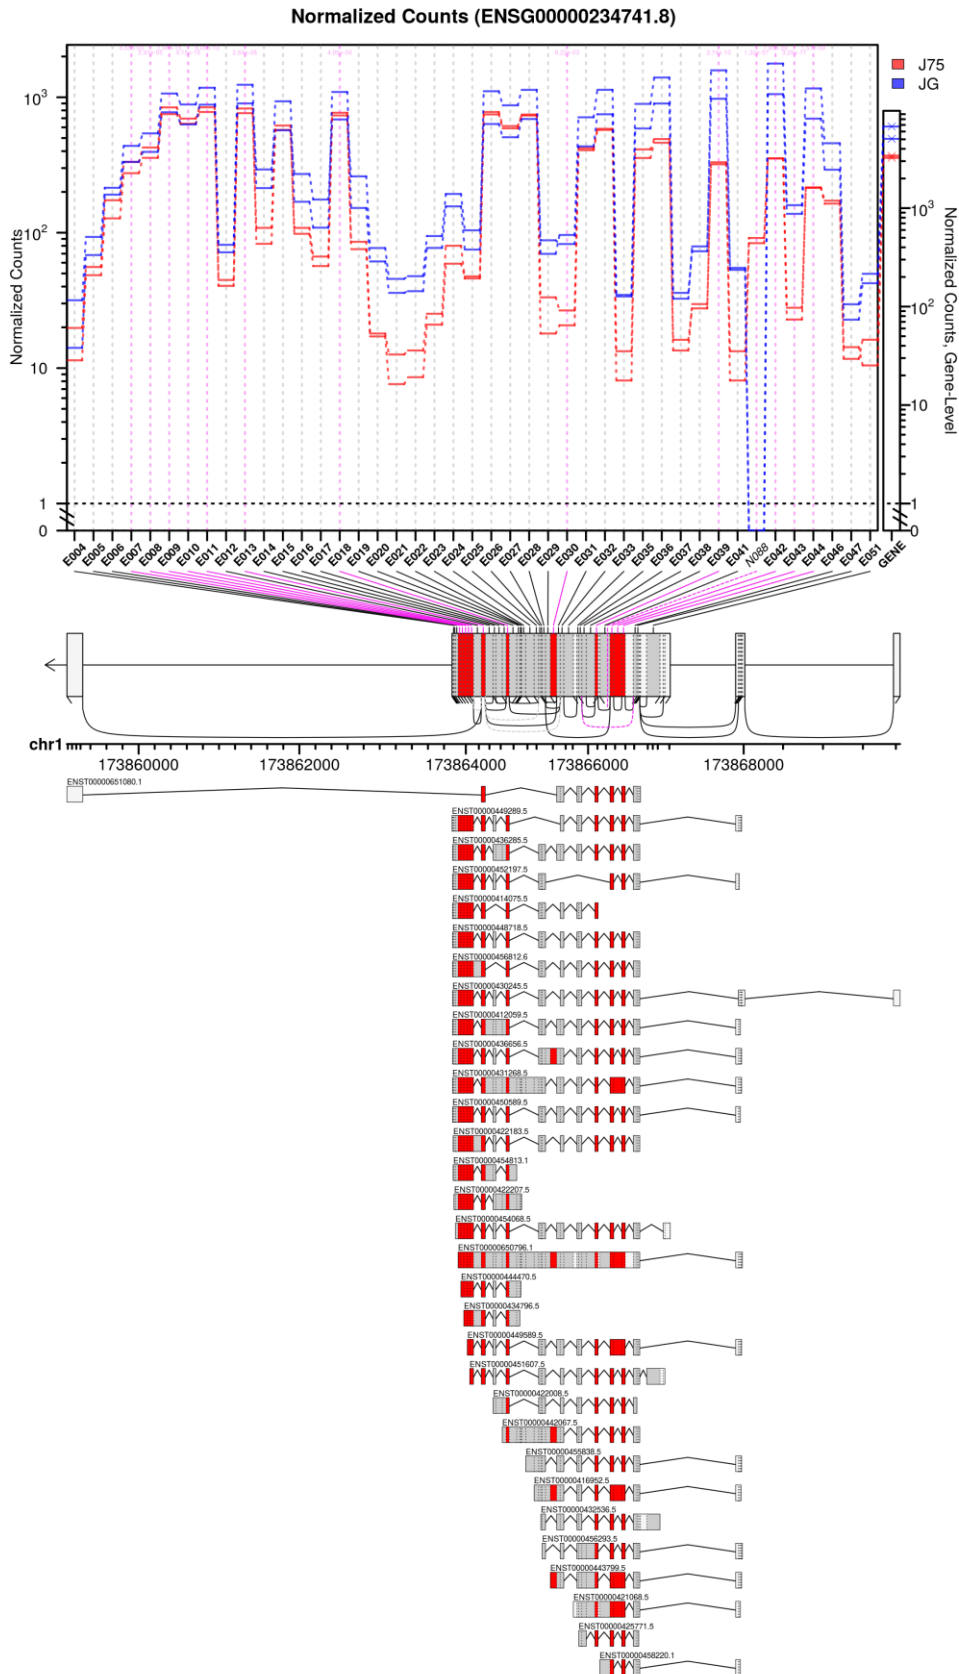

# 293FT-75-2 vs 293FT-pX

## Gas5 junctions

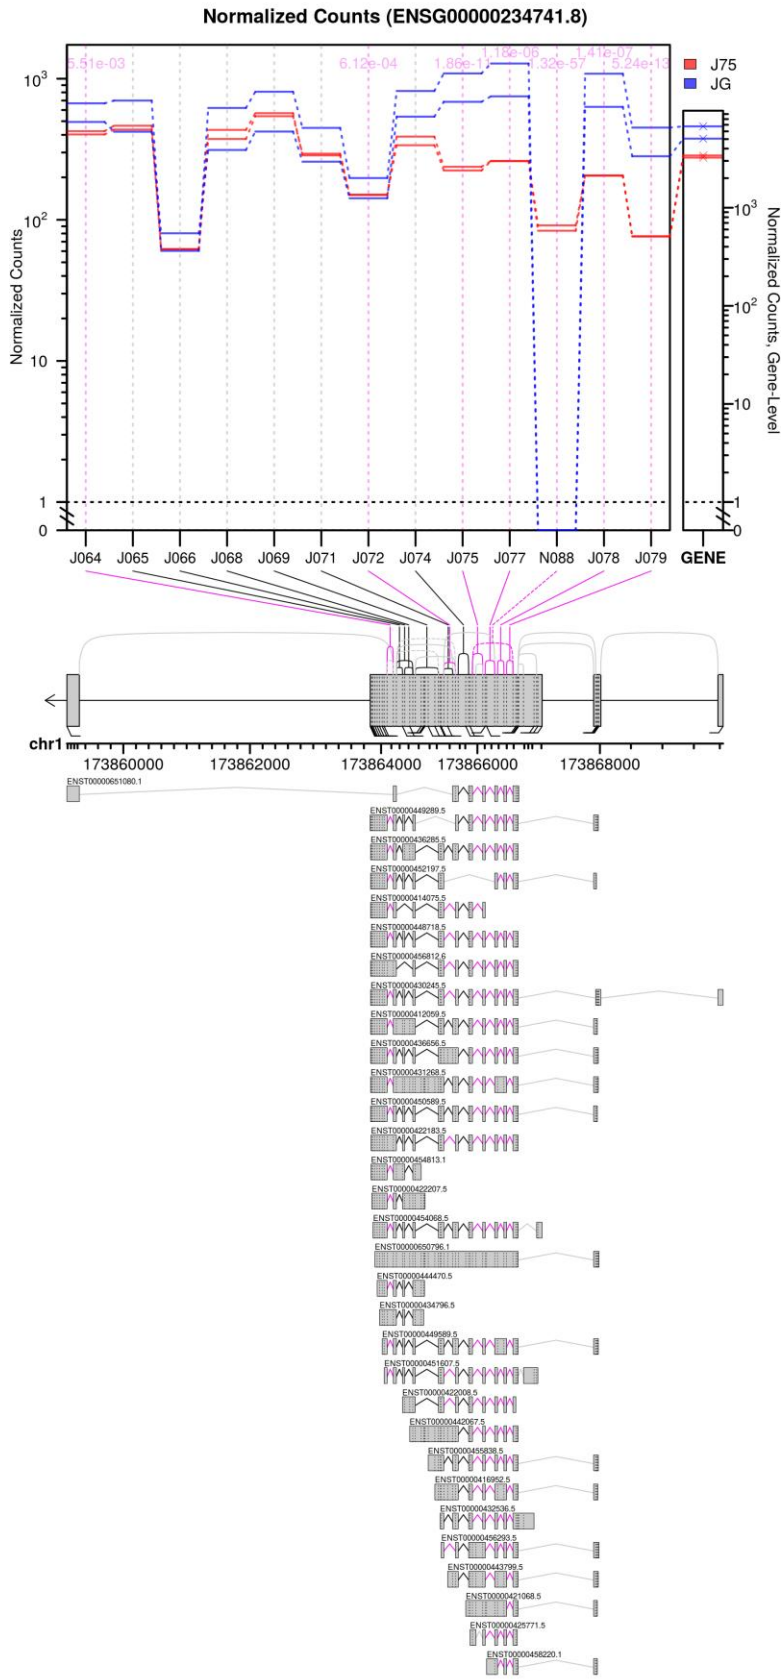

# 293FT-74-4 vs 293FT-pX

## Gas5 exons

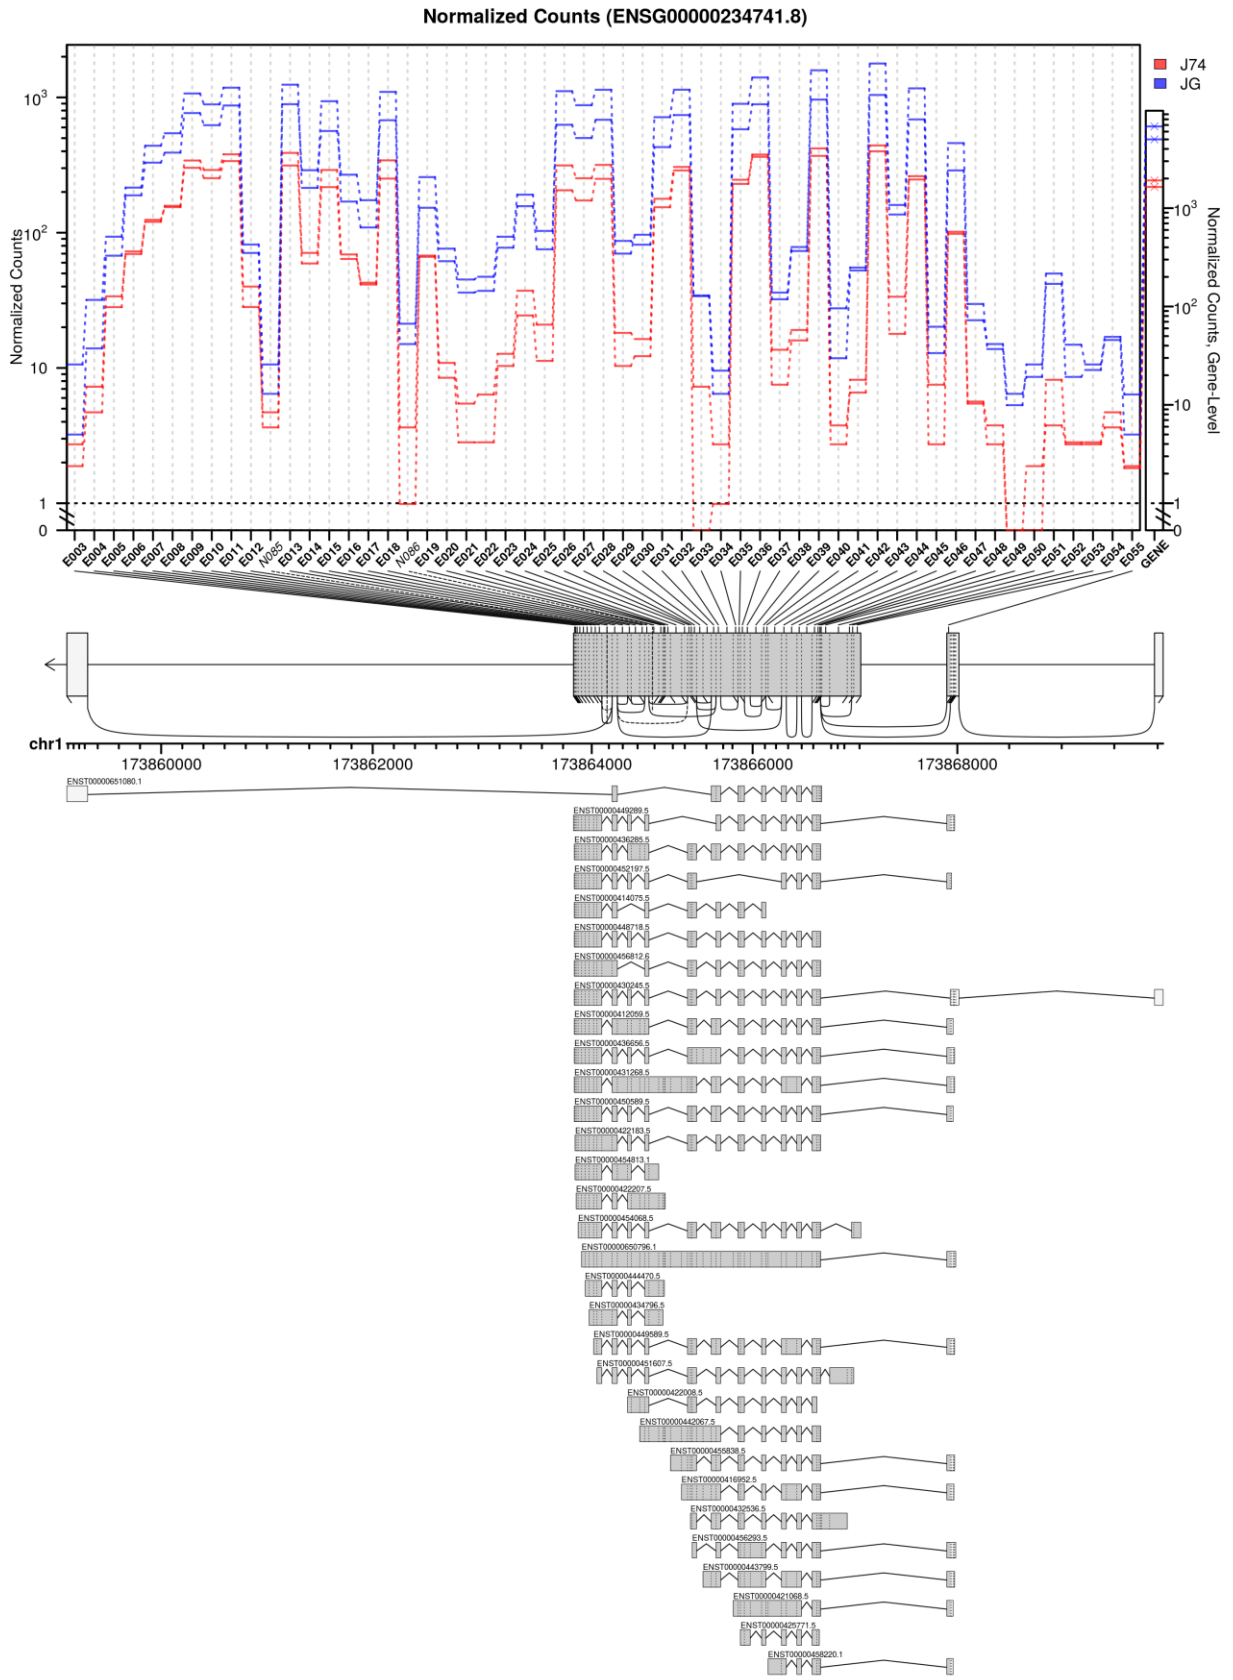

# 293FT-74-4 vs 293FT-pX

## Gas5 junctions

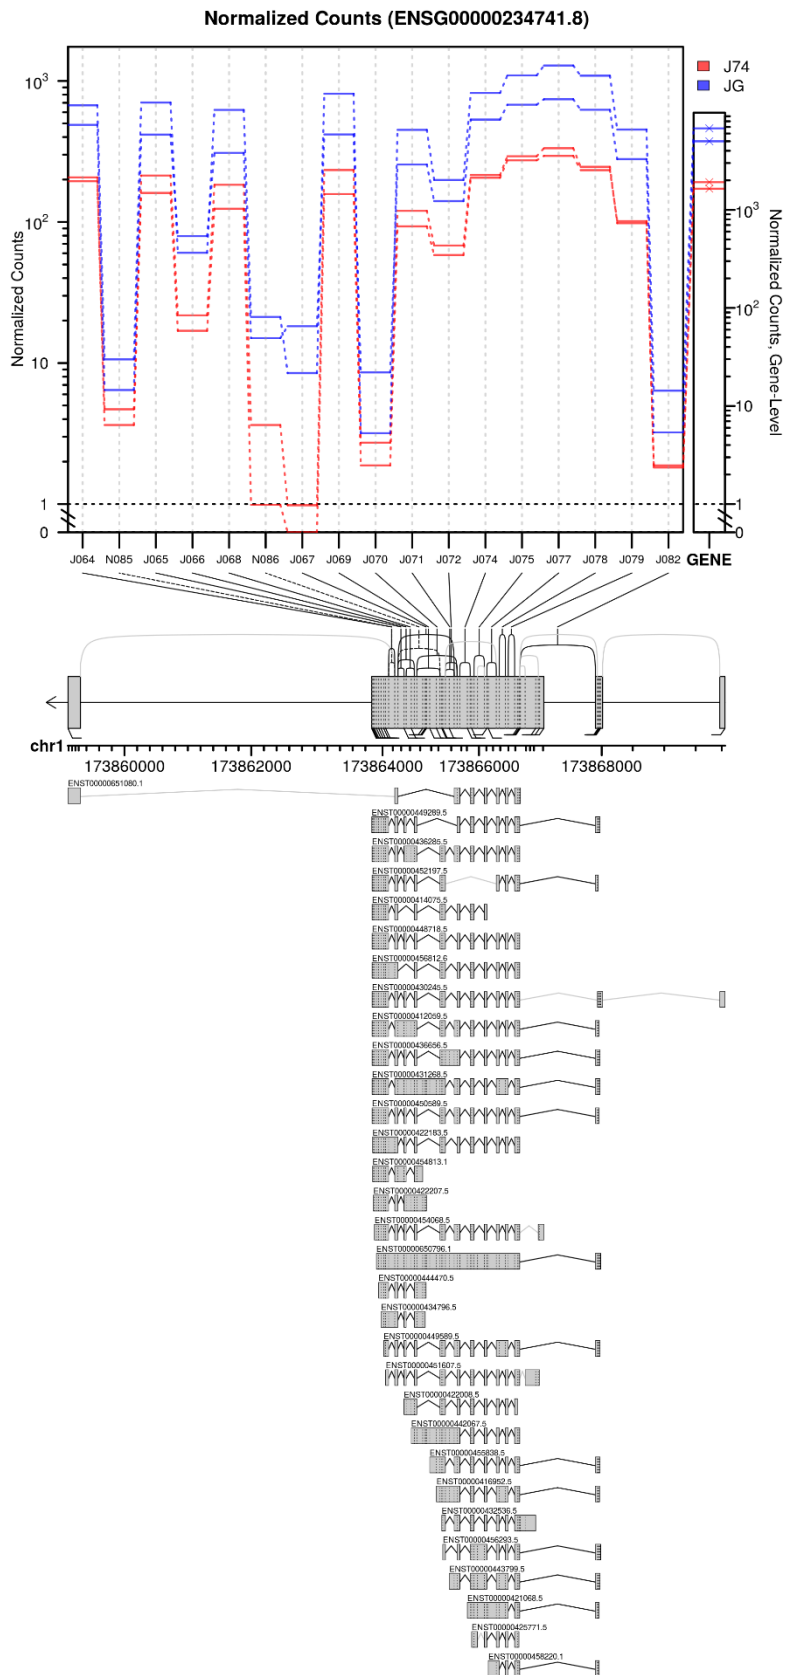

# 293FT-77-1 vs 293FT-pX

## Gas5 exons

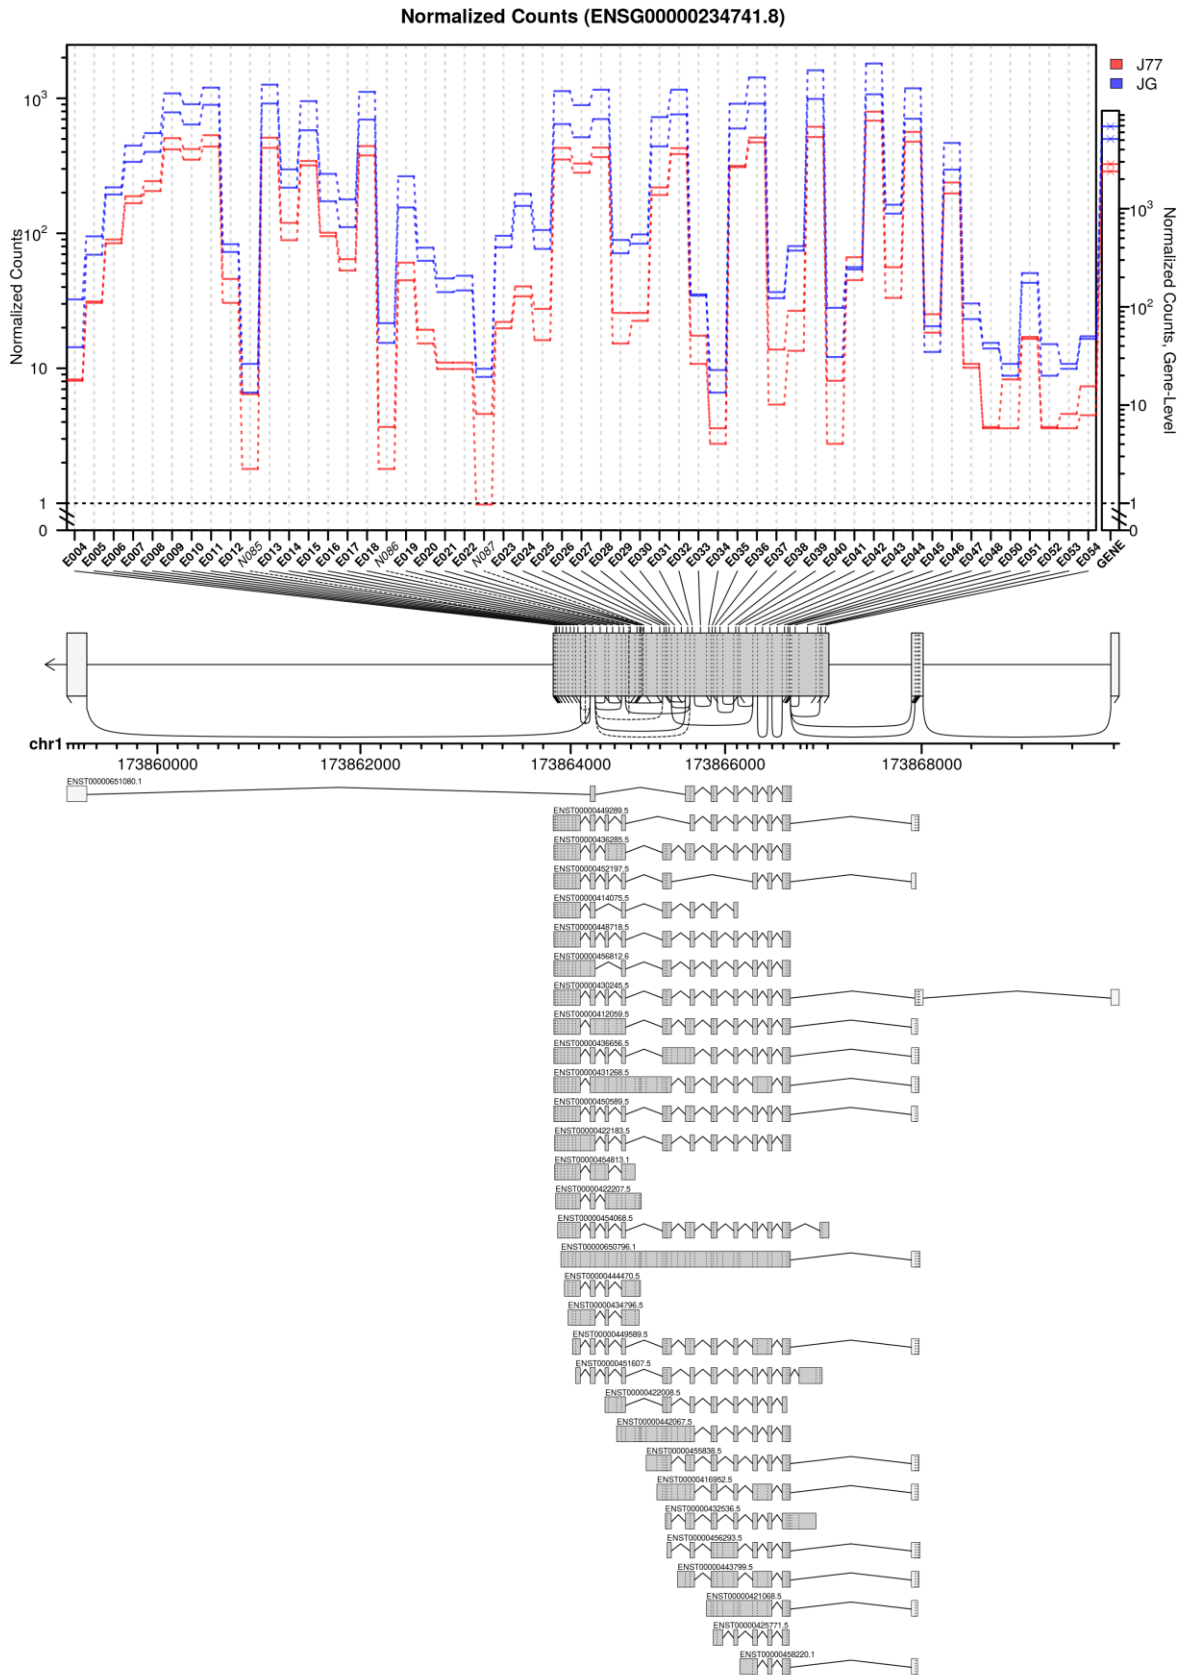

# 293FT-77-1 vs 293FT-pX

## Gas5 junctions

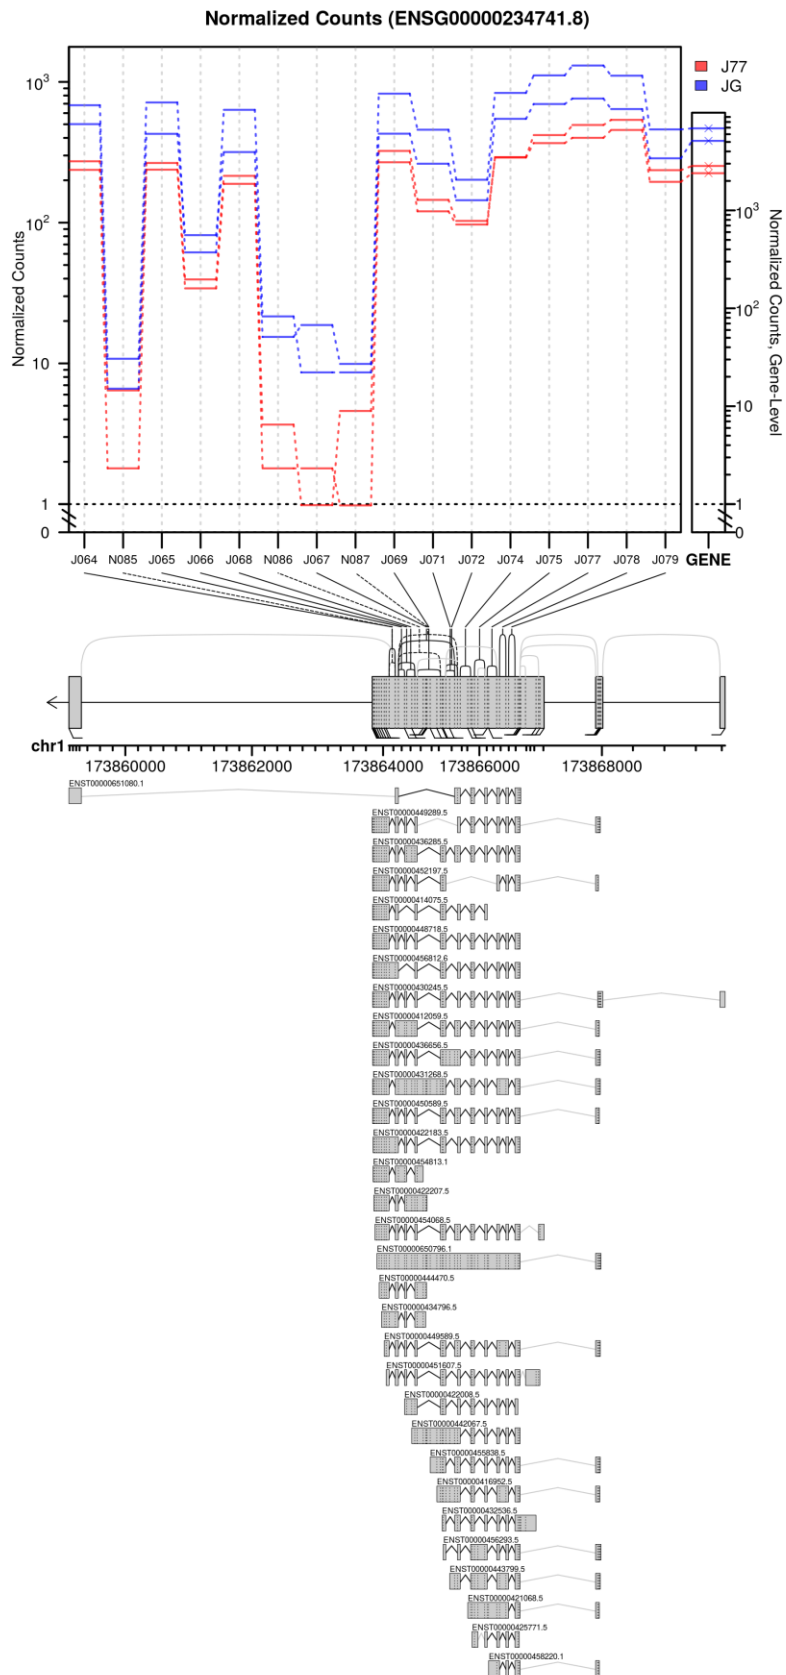

# 293FT-80-1 vs 293FT-pX

## Gas5 exons

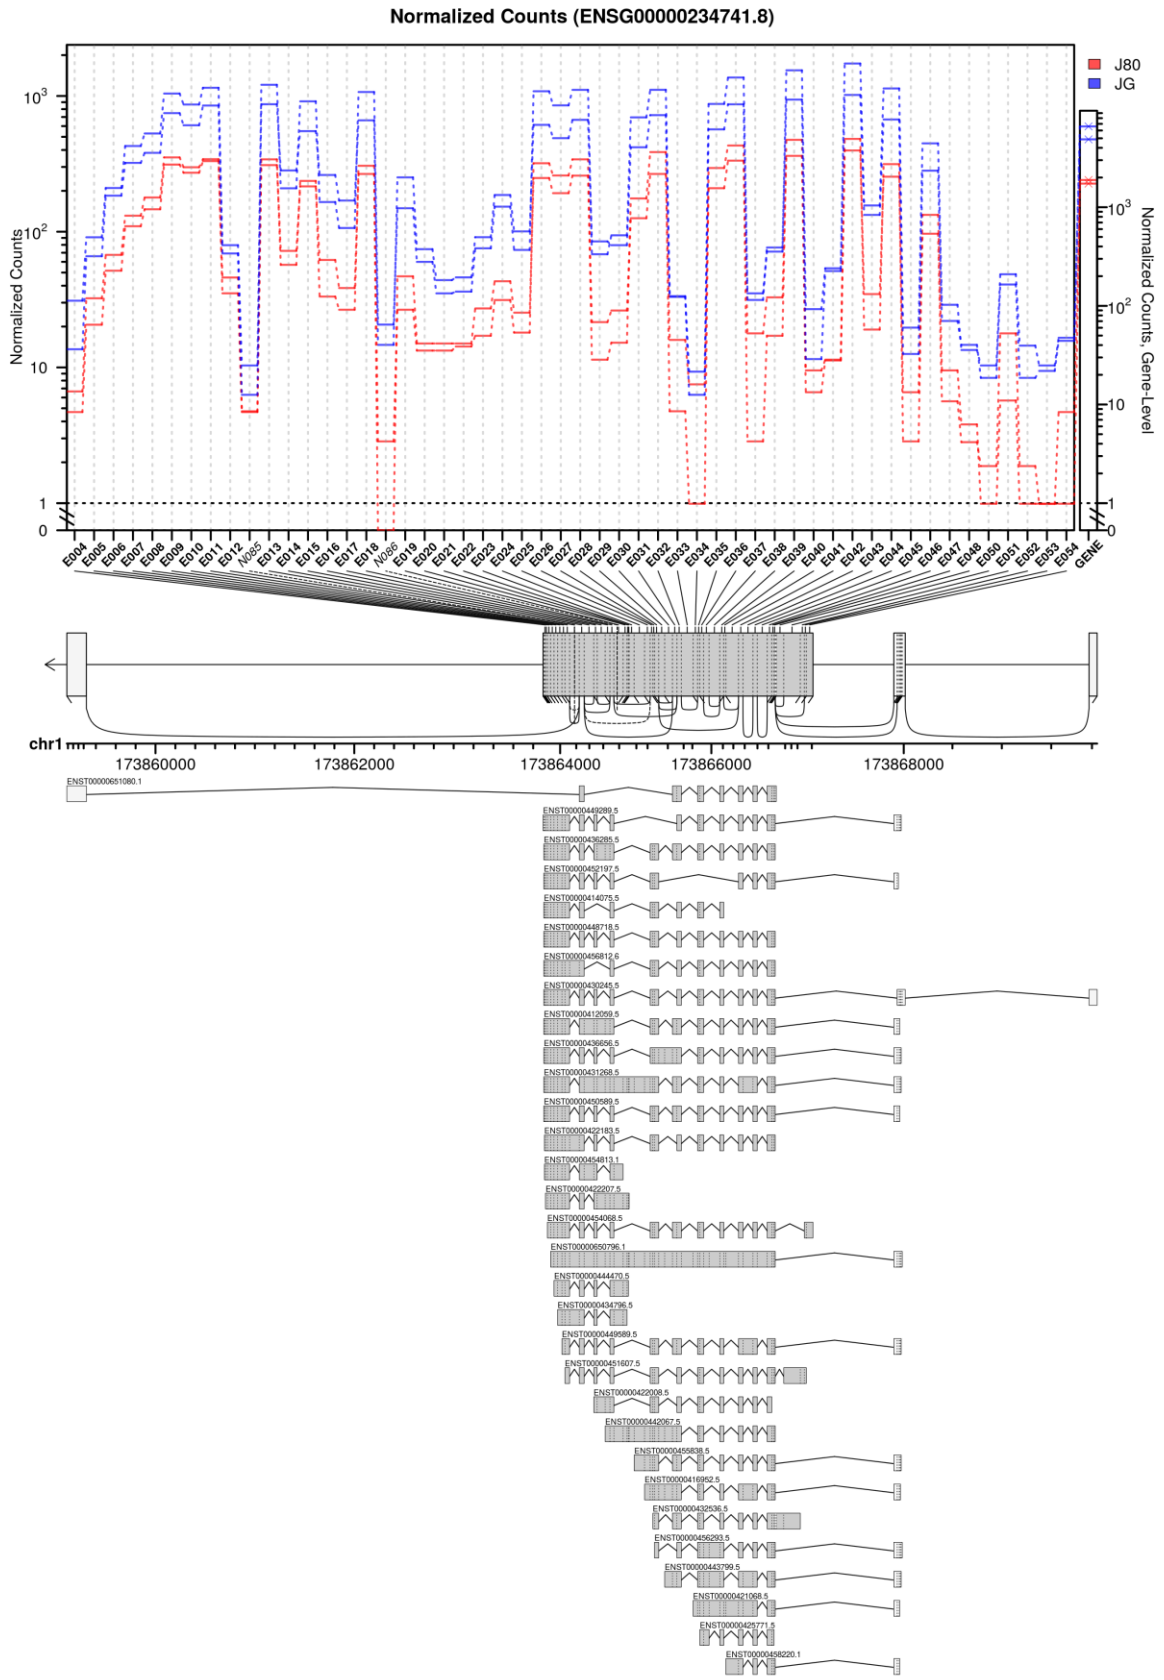

# 293FT-80-1 vs 293FT-pX

## Gas5 junctions

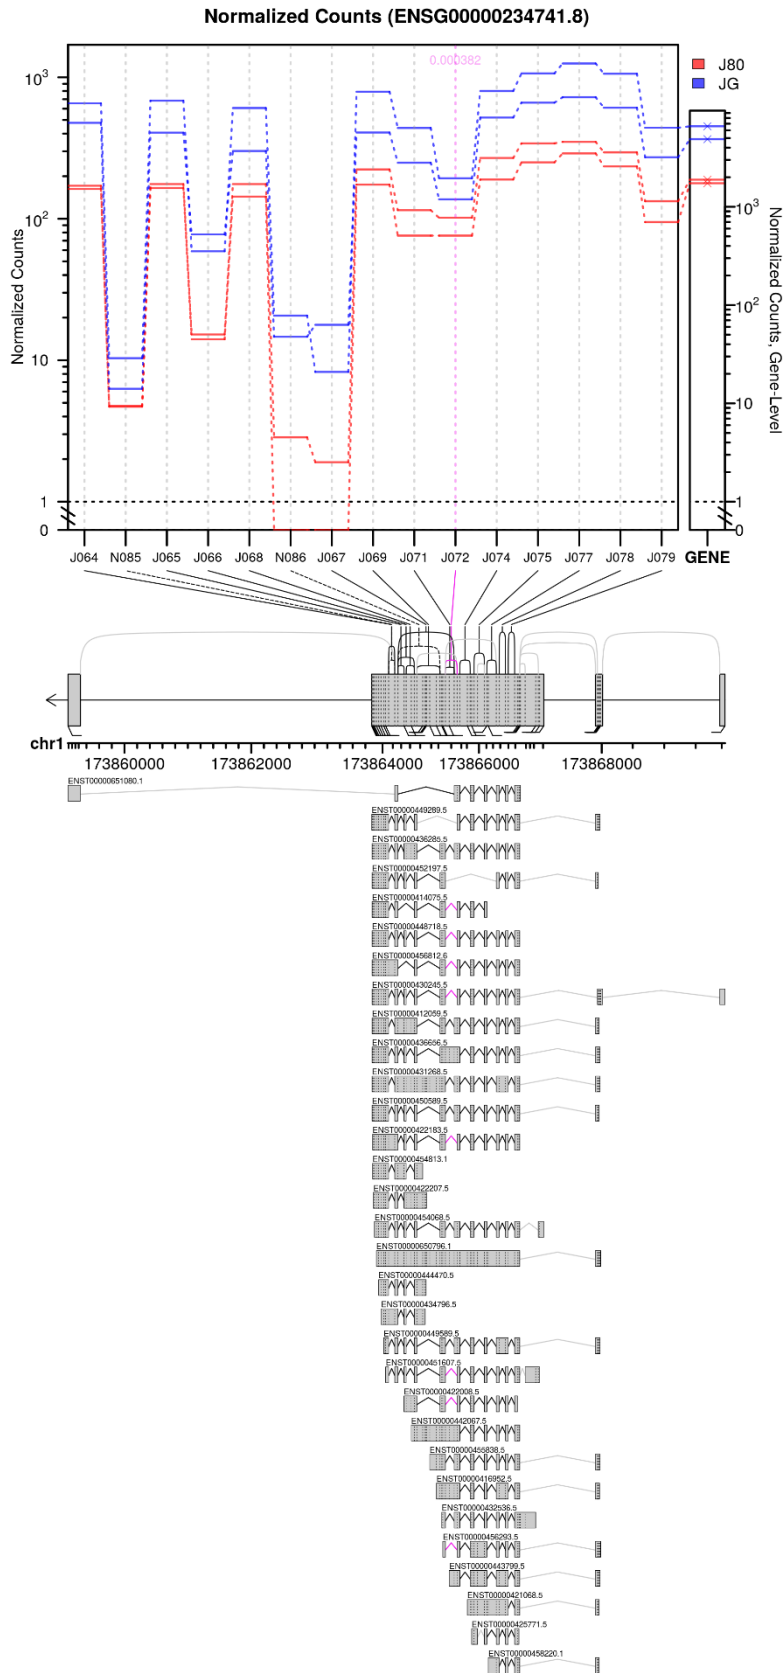

Supplement: DataSheet_2.pdf [file DataSheet_2.pdf]
