# Supplementary material for: Are Small Nucleolar RNAs “CRISPRable”? A Report on Box C/D Small Nucleolar RNA Editing in Human Cells
Source: PubMed Central journal article supplement (PMC6856654; doi:10.3389/fphar.2019.01246), 2019-11-04
Supplement: DataSheet_3.pdf [file DataSheet_3.pdf]

## **Alternative Splicing Events:**

**SE** - Skipped exon

**A5SS** - Alternative 5' splice site

**A3SS** - Alternative 3' splice site

**MXE** - Mutually exclusive exons

**RI** - Retained intron

## **Samples:**

**293FT-pX** - 293FT cells transfected with pX458 plasmid without sgRNA

**293FT-74-4** - 293FT cells with CRISPR/Cas9 mediated mutation of SNORD74

**293FT-75-2** - 293FT cells with CRISPR/Cas9 mediated mutation of SNORD75

**293FT-77-1** - 293FT cells with CRISPR/Cas9 mediated mutation of SNORD77

**293FT-80-1** - 293FT cells with CRISPR/Cas9 mediated mutation of SNORD80

chr1:173864257:173864304:-@chr1:173864257:173865282:-@chr1:173865471:173865547:-

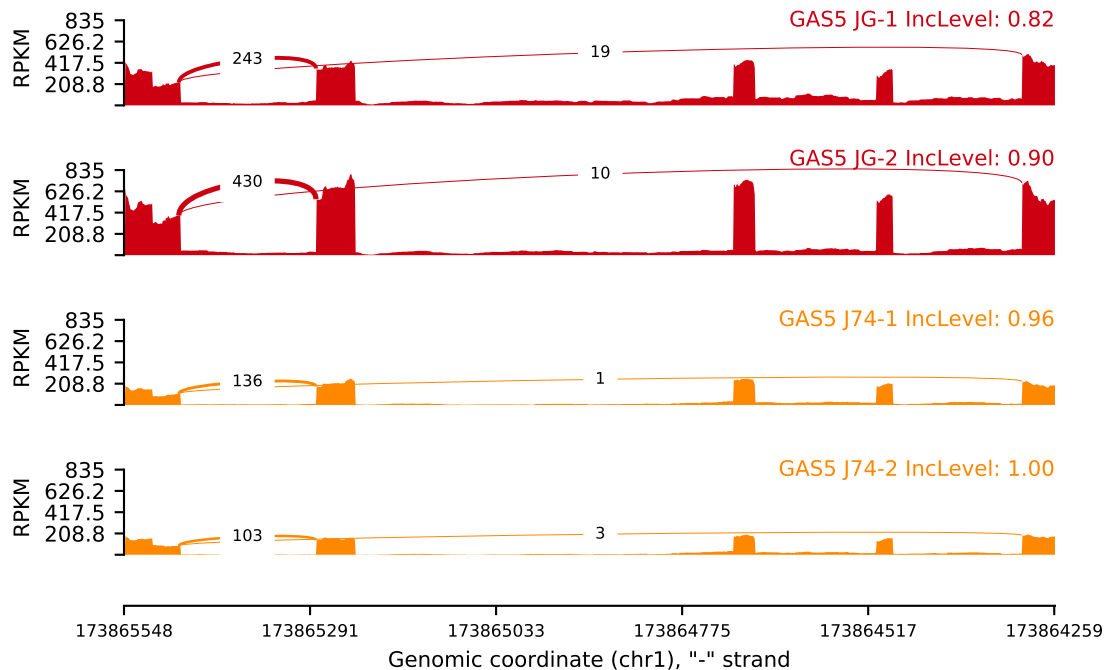

## 293FT-pX vs 293FT-74-4

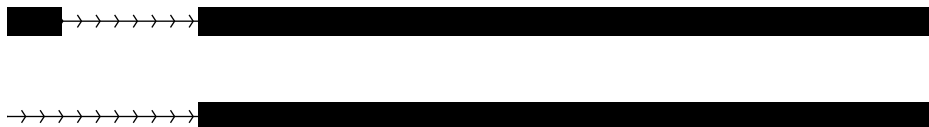

**A3SS**

chr1:173864257:173864704:-@chr1:173864257:173865282:-@chr1:173865471:173865547:-

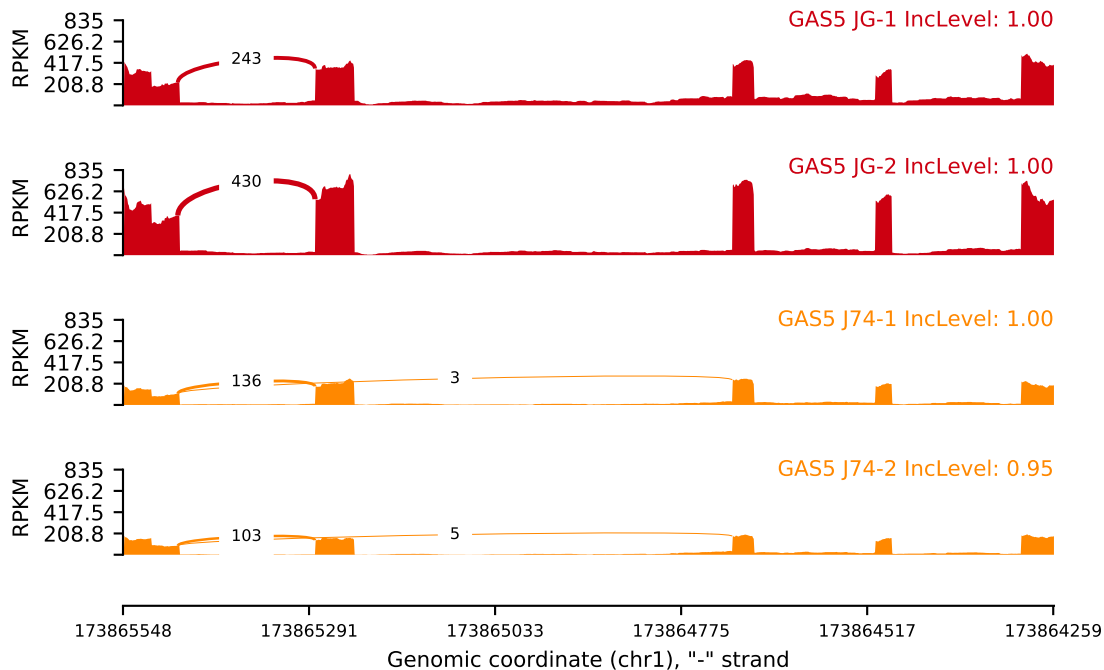

## 293FT-pX vs 293FT-74-4



**A3SS**

chr1:173864257:173864304:-@chr1:173865229:173865547:-@chr1:173865471:173865547:-

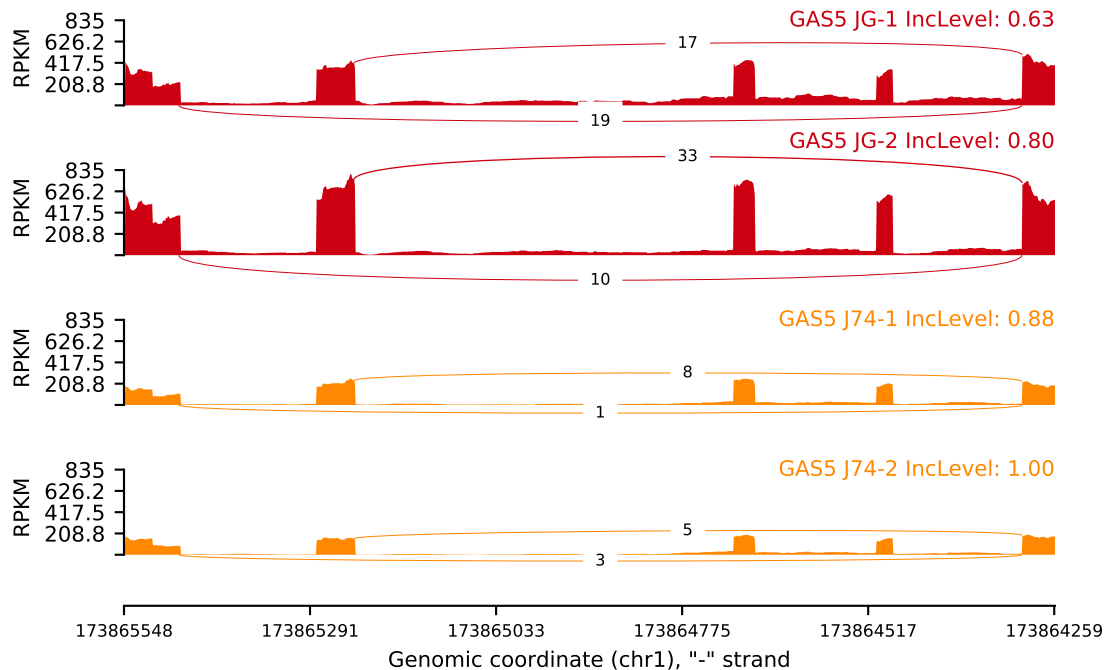

## 293FT-pX vs 293FT-74-4

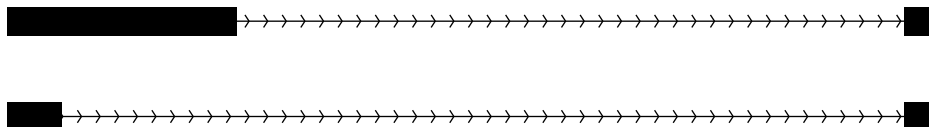

**A5SS**

chr1:173865229:173865282:-@chr1:173865471:173865547:-@chr1:173865510:173865547:-

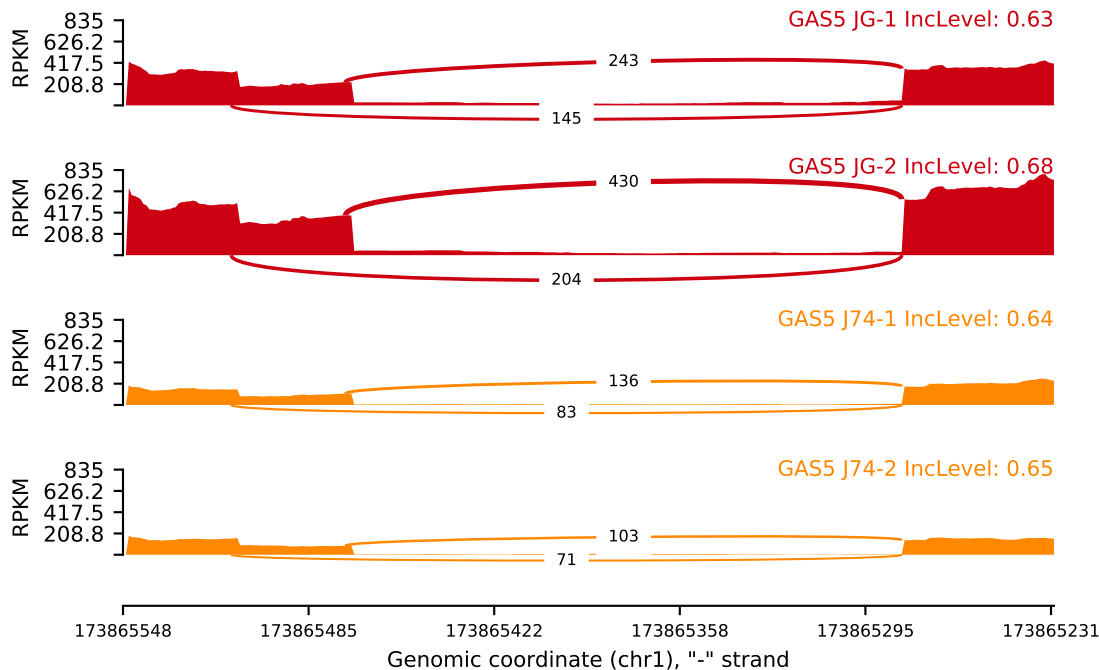

## 293FT-pX vs 293FT-74-4

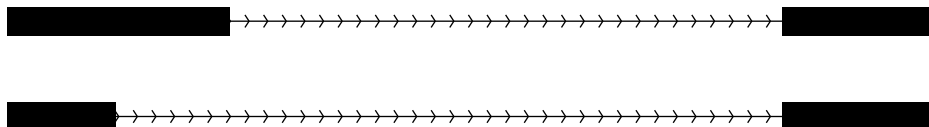

**A5SS**

chr1:173865471:173865547:-@chr1:173864484:173864704:-@chr1:173864257:173864304:-

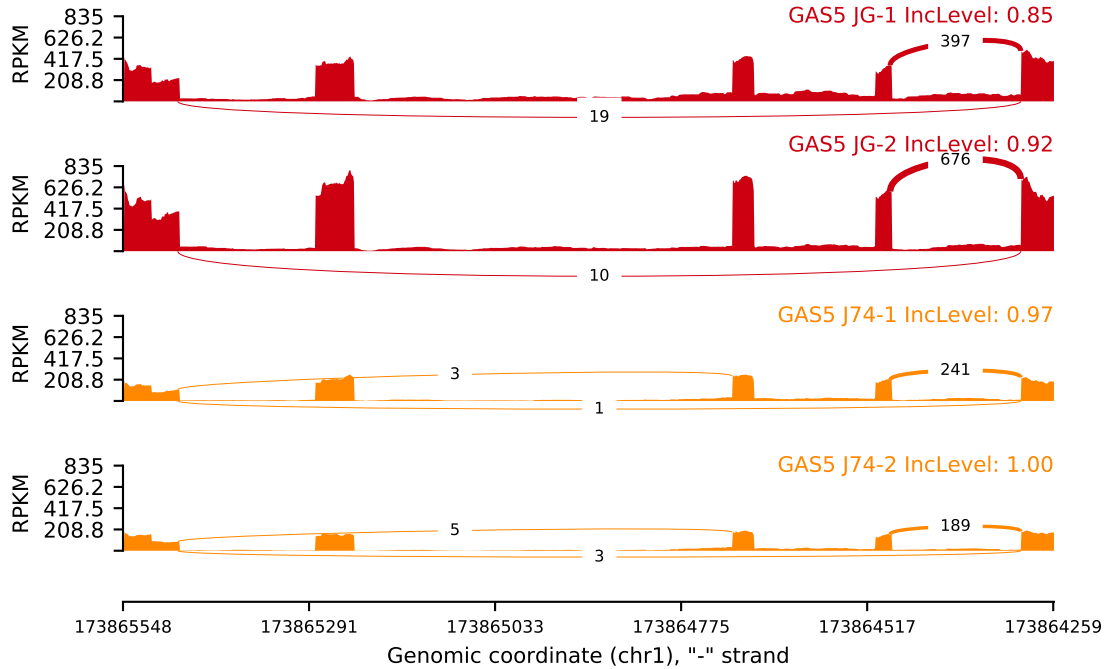

## 293FT-pX vs 293FT-74-4

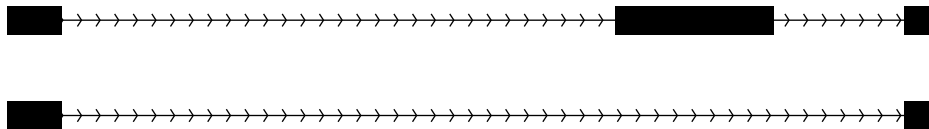

SE

chr1:173865471:173865547:-@chr1:173864675:173864704:-@chr1:173863901:173864304:-

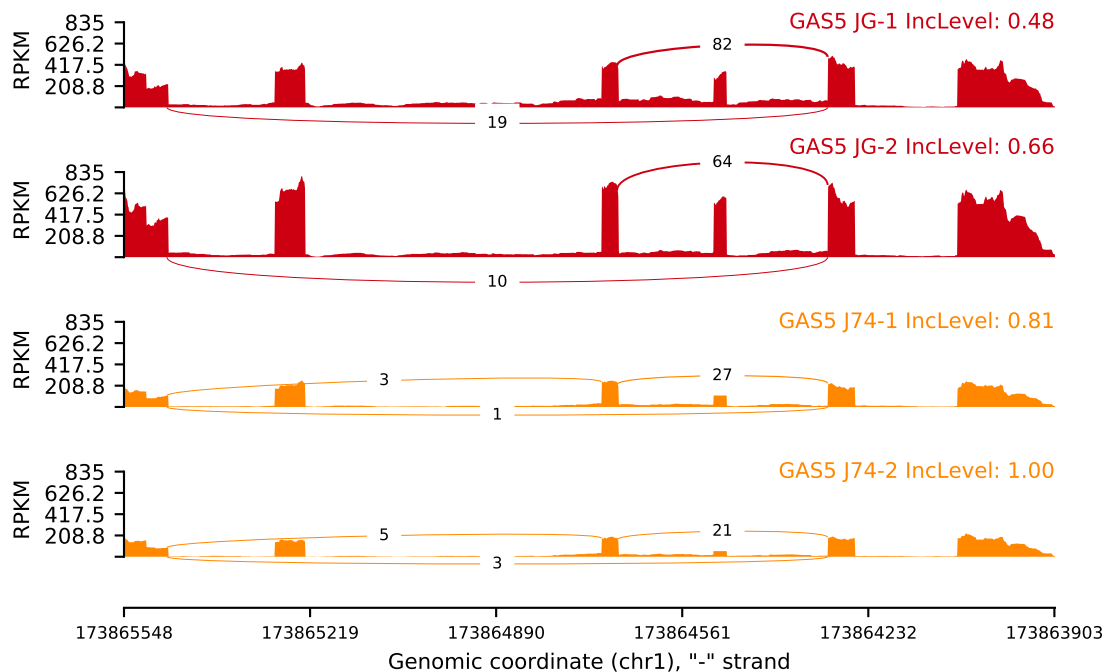

## 293FT-pX vs 293FT-74-4

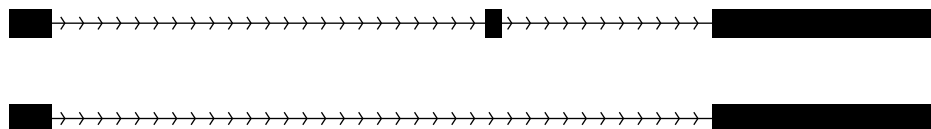

SE

173866991:173867030:-@chr1:173866761:173866796:-@chr1:173865510:173865547:-@chr1:173865229:173865282:-

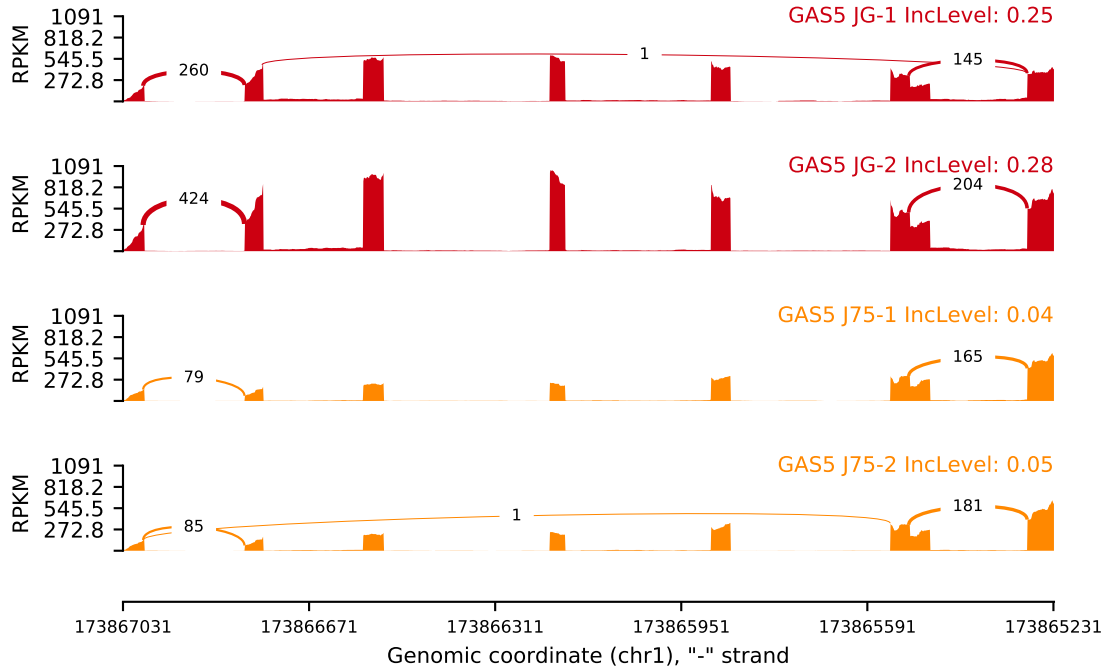

## 293FT-pX vs 293FT-75-2

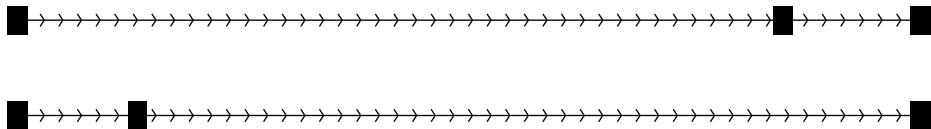

**MXE**



chr1:173864675:173864704:-@chr1:173864257:173864704:-@chr1:173864257:173864304:-

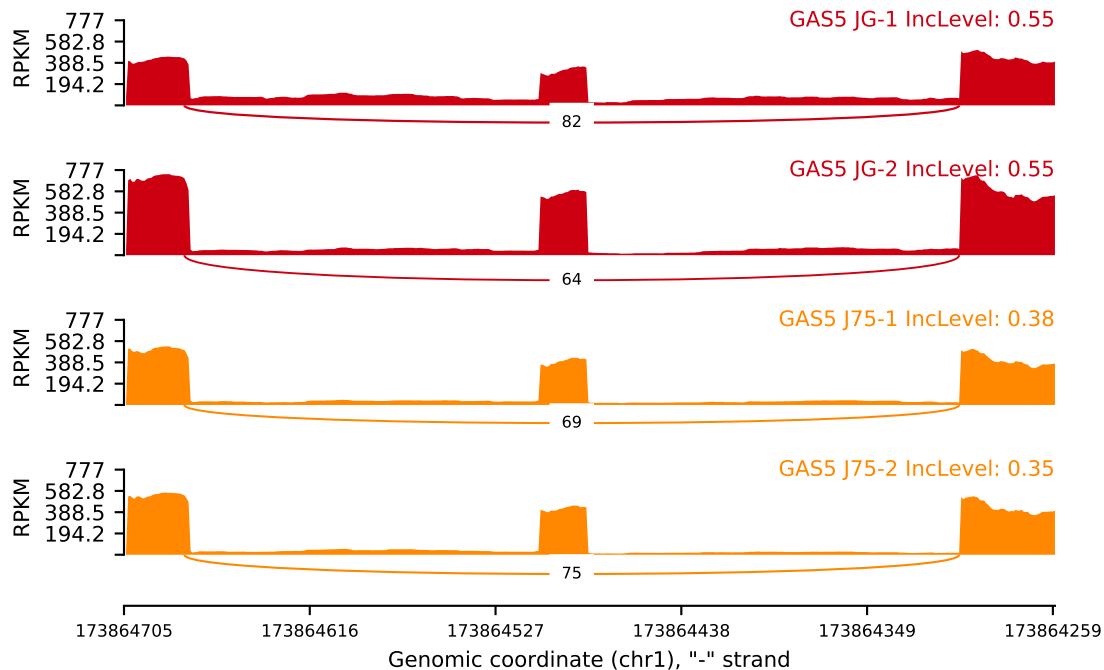

## 293FT-pX vs 293FT-75-2

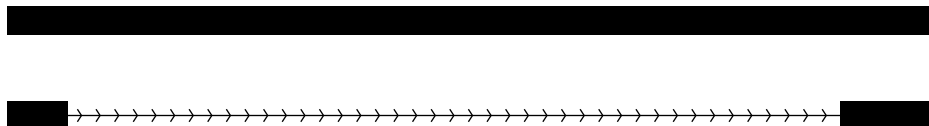

RI

chr1:173865510:173865547:-@chr1:173865229:173865547:-@chr1:173865229:173865282:-

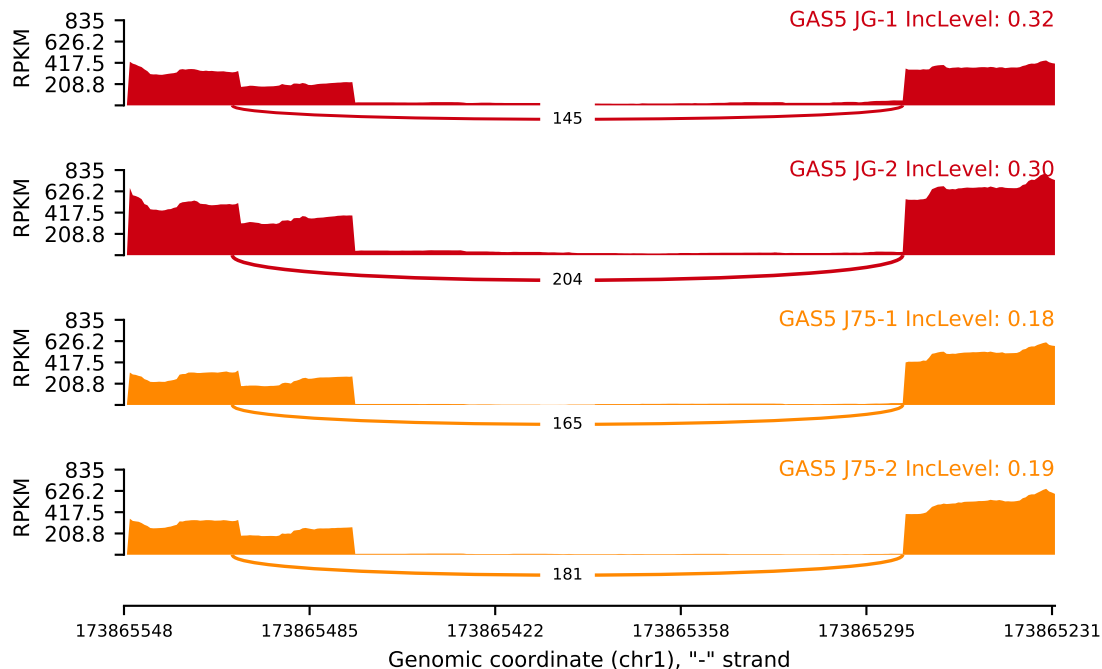

## 293FT-pX vs 293FT-75-2

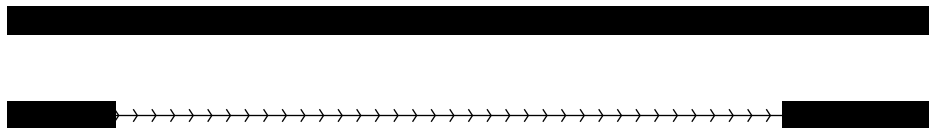

RI

chr1:173866991:173867043:-@chr1:173866528:173866796:-@chr1:173865857:173865894:-

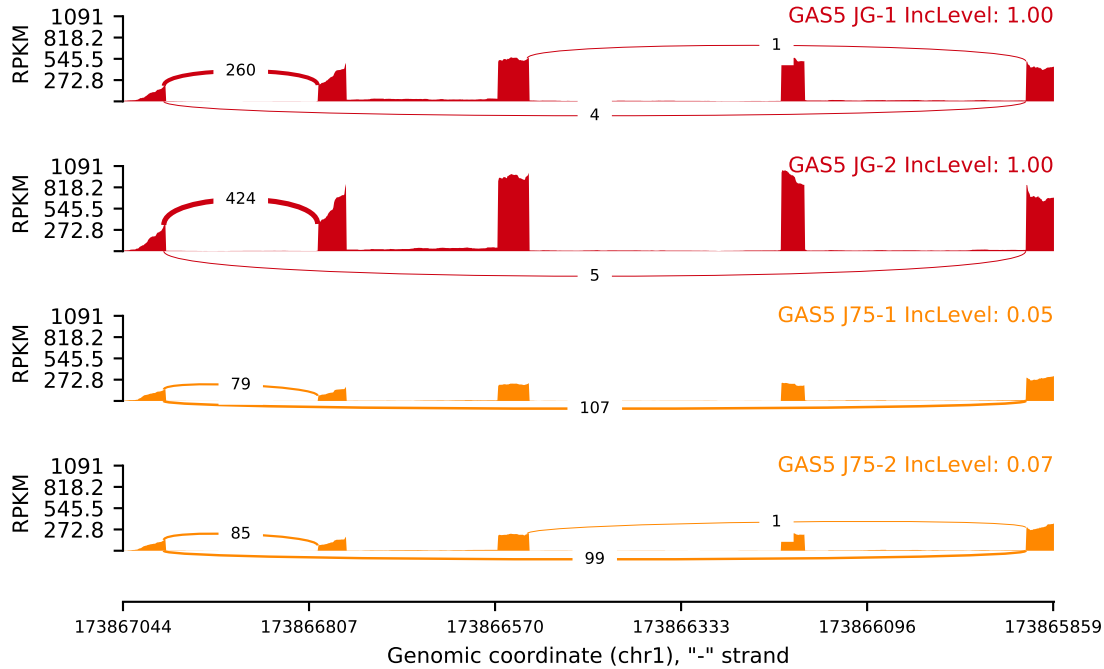

## 293FT-pX vs 293FT-75-2

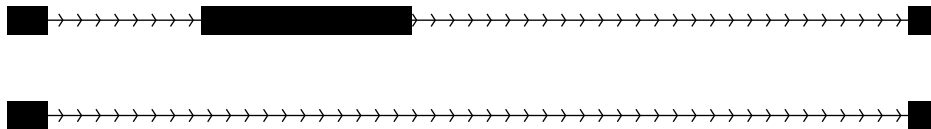

SE

chr1:173864257:173864304:-@chr1:173864257:173864704:-@chr1:173865471:173865547:-

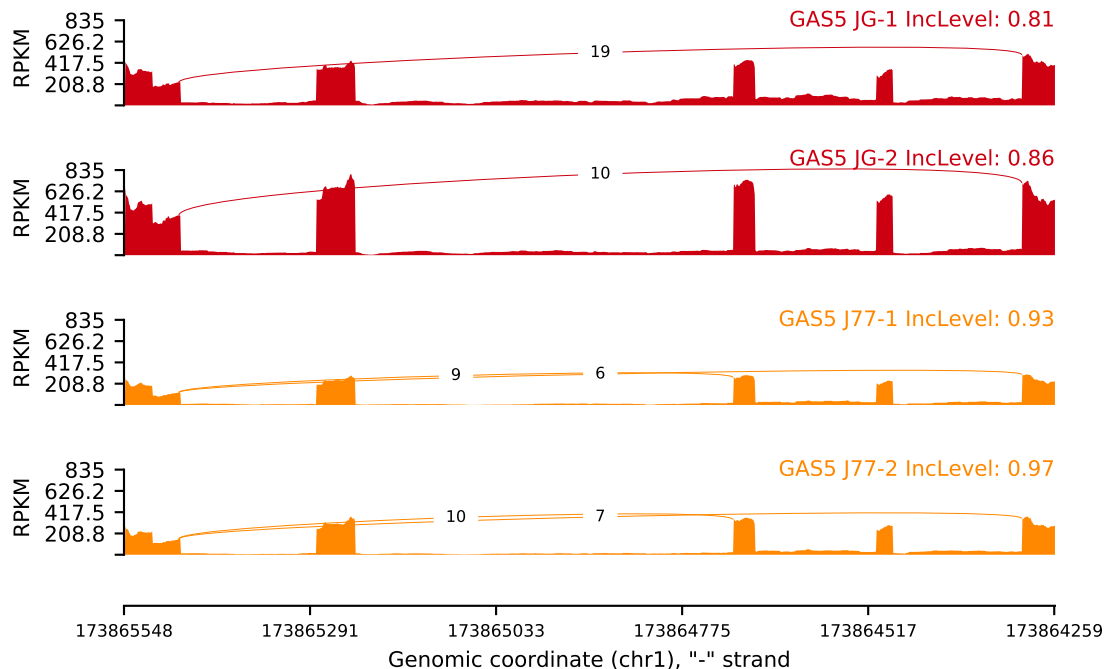

## 293FT-pX vs 293FT-77-1

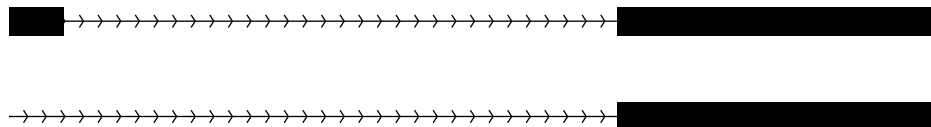

**A3SS**

chr1:173865510:173865547:-@chr1:173865229:173865547:-@chr1:173865229:173865282:-

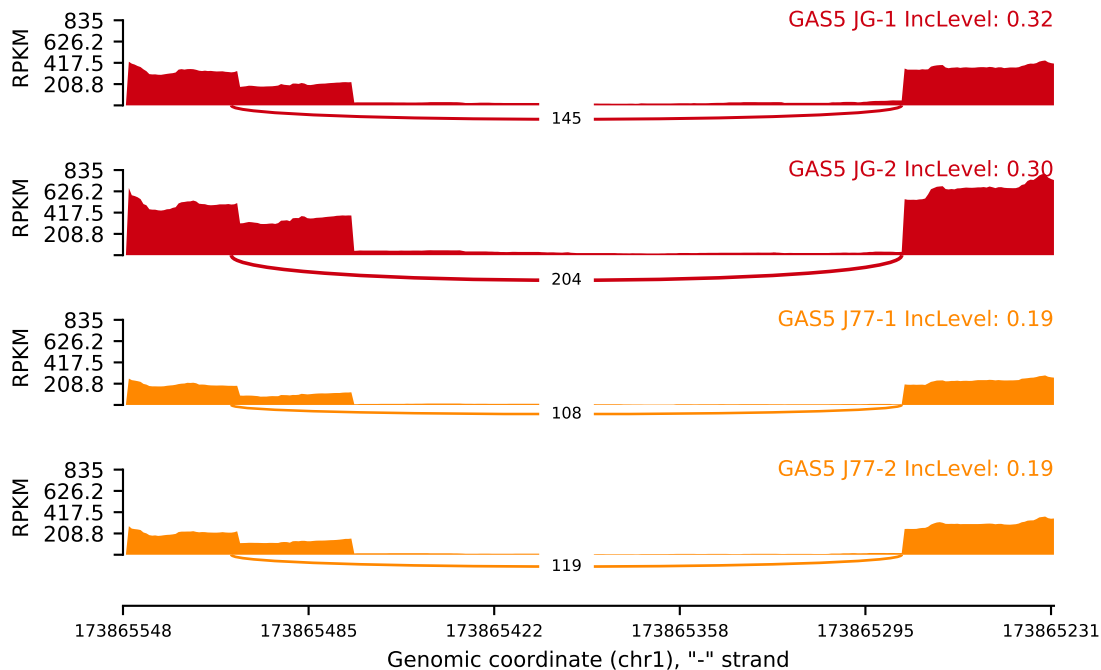

## 293FT-pX vs 293FT-77-1

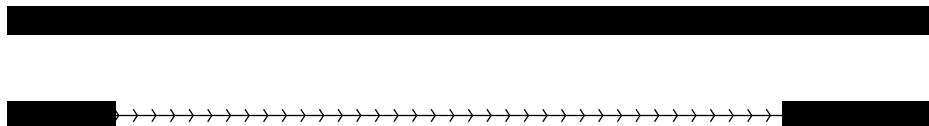

RI

chr1:173864257:173864304:-@chr1:173864257:173864704:-@chr1:173865471:173865547:-

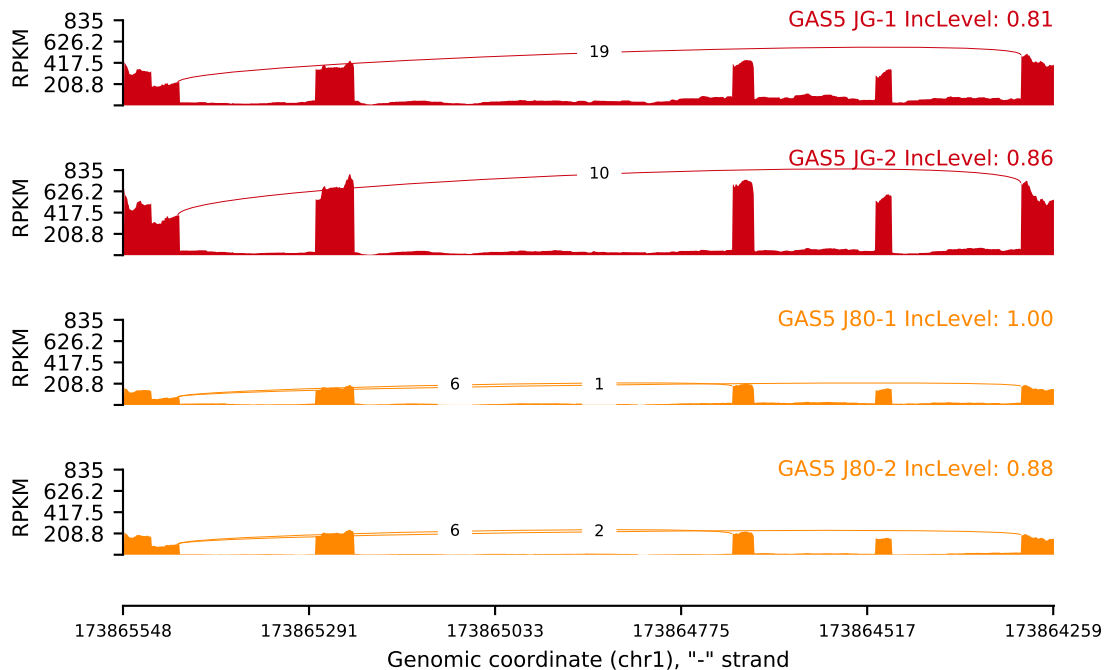

## 293FT-pX vs 293FT-80-1



**A3SS**

chr1:173864257:173864704:-@chr1:173864257:173865282:-@chr1:173865471:173865547:-

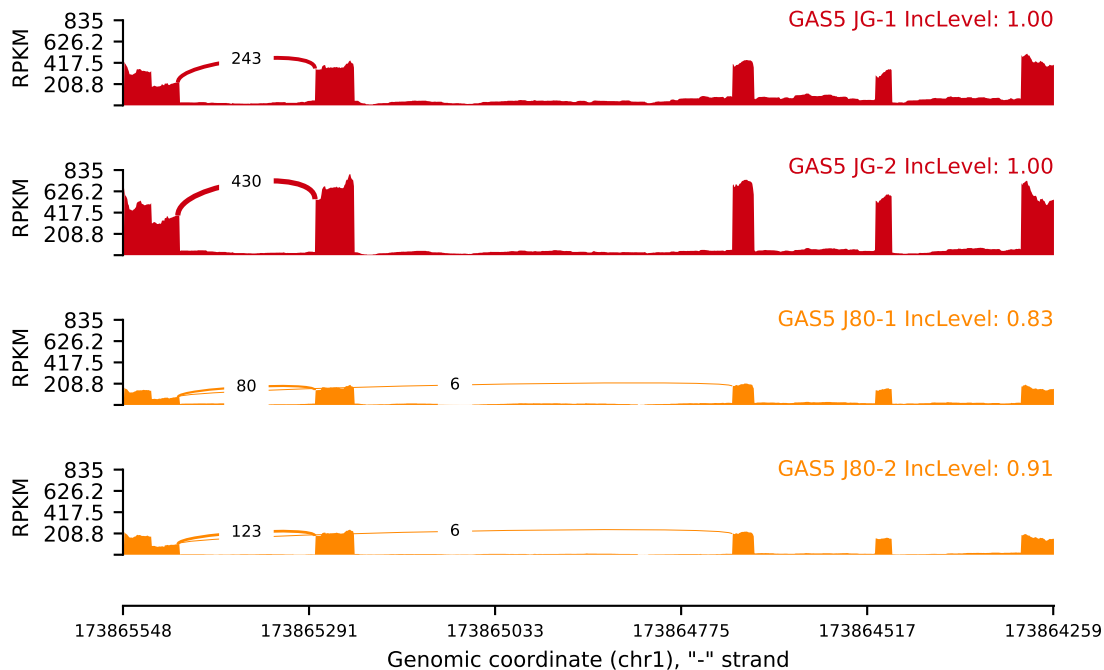

## 293FT-pX vs 293FT-80-1



**A3SS**

chr1:173865229:173865282:-@chr1:173865471:173865547:-@chr1:173865510:173865547:-

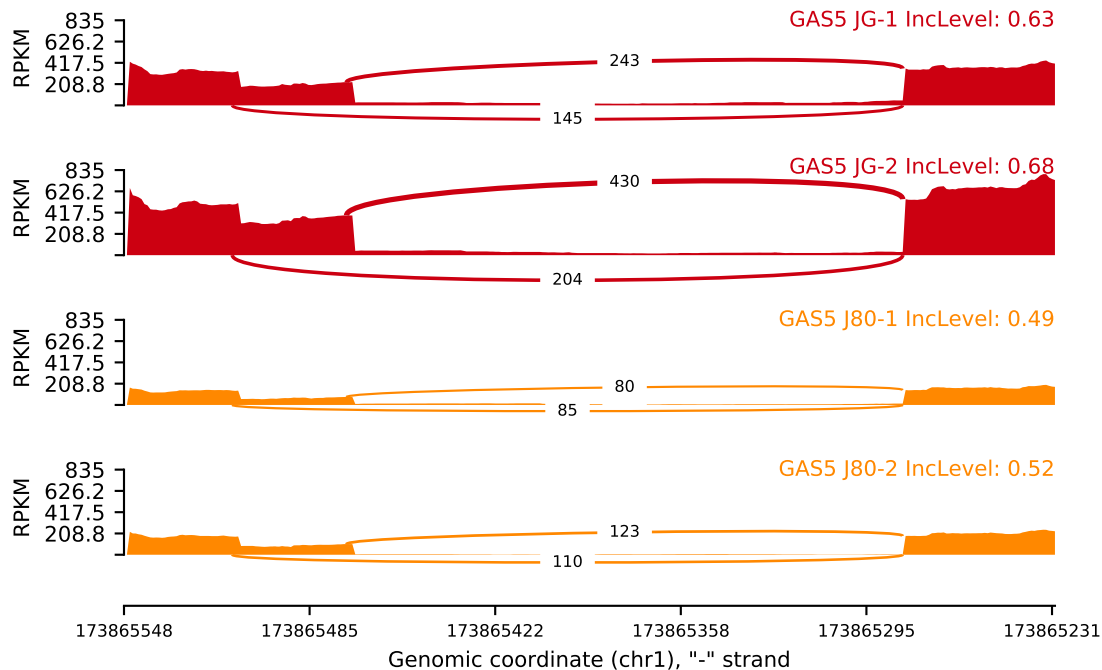

## 293FT-pX vs 293FT-80-1

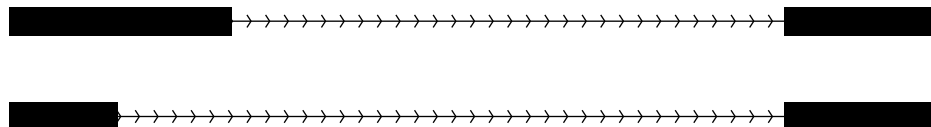

**A5SS**



chr1:173865510:173865547:-@chr1:173865229:173865547:-@chr1:173865229:173865282:-

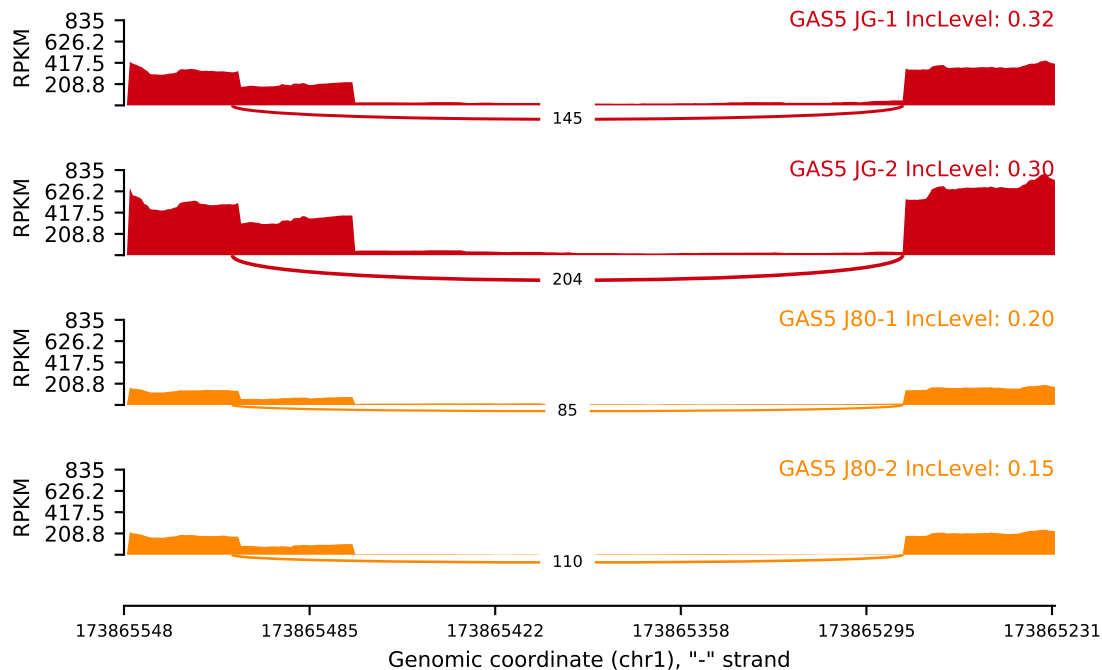

## 293FT-pX vs 293FT-80-1



RI
