# Supplementary material for: Are Small Nucleolar RNAs “CRISPRable”? A Report on Box C/D Small Nucleolar RNA Editing in Human Cells
Source: Front Pharmacol. 2019 Nov 4;10:1246. doi: 10.3389/fphar.2019.01246 (PMC6856654; doi:10.3389/fphar.2019.01246)
Supplement: Supplementary file 7 [file Table_4.xlsx]

## Sheet: GO_Molecular_Function_2017b 
	Overlap	P-value	Adjusted_P-value	Old_P-value	Old_Adjusted_P-value	Z-score	Combined_Score	Gene_List
74-4 vs control
GO_Molecular_Function_2017b	http://amp,pharm,mssm,edu/Enrichr/export?userListId=17280594&filename=temp_out&backgroundType=GO_Molecular_Function_2017b
single-stranded DNA binding (GO:0003697)	28/544	0.00351392	0.359384	0.0091696	0.517644	-3.27101	18.4846	CEBPA;GTF3C6;HOXD13;YEATS4;HMGB1;BRCA2;KIF15;SOX2;BRIP1;MECOM;MYC;HLTF;ALX4;ZNF268;EGR1;JUN;DENND4A;VDR;SETMAR;HMGA2;PBX1;FOXP2;FLI1;POLA1;SFPQ;RPA3;SUB1;NUP35
damaged DNA binding (GO:0003684)	26/506	0.0049178	0.359384	0.012079	0.517644	-3.27984	17.432	CEBPA;DCLRE1A;GTF3C6;HOXD13;YEATS4;HMGB1;KIF15;SOX2;BRIP1;MECOM;MYC;HLTF;ALX4;ZNF268;EGR1;JUN;DENND4A;VDR;SETMAR;HMGA2;PBX1;FOXP2;FLI1;POLA1;SFPQ;RPA3
mRNA binding (GO:0003729)	51/1230	0.00977838	0.359384	0.0275793	0.517644	-3.73105	17.2657	FASTKD2;WDR3;FASTKD3;IFIT5;GPATCH4;HMGB1;SYNE1;MRPL3;MRPL1;SNRPD1;HMGN2;LBR;DDX18;NCOA5;EIF1AX;DNTTIP2;THOC2;PTBP2;RPP25L;SFPQ;SUB1;SRSF3;KCTD12;CXORF57;SRSF7;SRSF8;HDAC2;DDX1;JAKMIP1;KRCC1;C7ORF50;IFI16;HLTF;DARS;NOP58;JUN;TRMT10C;API5;FUS;SORBS2;LSM5;MAGOHB;LSM3;BICC1;DHFR;HNRNPM;UBE2N;SSBP1;SLIRP;RBM45;RAN
miRNA binding (GO:0035198)	50/1203	0.0100385	0.359384	0.0280125	0.517644	-3.66185	16.8494	FASTKD2;WDR3;FASTKD3;IFIT5;GPATCH4;HMGB1;SYNE1;SOX2;MRPL3;MRPL1;SNRPD1;HMGN2;LBR;DDX18;NCOA5;EIF1AX;DNTTIP2;PTBP2;RPP25L;SFPQ;SUB1;SRSF3;KCTD12;CXORF57;SRSF7;SRSF8;HDAC2;DDX1;JAKMIP1;KRCC1;C7ORF50;IFI16;HLTF;DARS;NOP58;JUN;TRMT10C;API5;FUS;SORBS2;LSM5;MAGOHB;LSM3;BICC1;HNRNPM;UBE2N;SSBP1;SLIRP;RBM45;RAN
primary miRNA binding (GO:0070878)	50/1204	0.0101868	0.359384	0.0283729	0.517644	-3.6616	16.7945	FASTKD2;WDR3;FASTKD3;IFIT5;GPATCH4;HMGB1;SYNE1;MRPL3;MRPL1;SNRPD1;HMGN2;LBR;DDX18;NCOA5;EIF1AX;DNTTIP2;PTBP2;RPP25L;SFPQ;SUB1;SRSF3;KCTD12;CXORF57;SRSF7;SRSF8;HDAC2;DDX1;JAKMIP1;KRCC1;C7ORF50;IFI16;HLTF;DARS;SMAD1;NOP58;JUN;TRMT10C;API5;FUS;SORBS2;LSM5;MAGOHB;LSM3;BICC1;HNRNPM;UBE2N;SSBP1;SLIRP;RBM45;RAN
double-stranded DNA binding (GO:0003690)	26/521	0.00710423	0.359384	0.0167171	0.517644	-3.24831	16.0696	CEBPA;GTF3C6;IFIT5;HOXD13;YEATS4;HMGB1;KIF15;SOX2;BRIP1;MECOM;IFI16;MYC;HLTF;ALX4;ZNF268;EGR1;JUN;DENND4A;VDR;SETMAR;HMGA2;PBX1;FOXP2;FLI1;POLA1;SFPQ
tRNA binding (GO:0000049)	50/1219	0.0126409	0.359384	0.0342337	0.517644	-3.64111	15.9146	FASTKD2;WDR3;FASTKD3;IFIT5;GPATCH4;HMGB1;SYNE1;MRPL3;MRPL1;SNRPD1;HMGN2;LBR;DDX18;NCOA5;EIF1AX;DARS2;DNTTIP2;PTBP2;RPP25L;SFPQ;SUB1;SRSF3;KCTD12;CXORF57;SRSF7;SRSF8;HDAC2;DDX1;JAKMIP1;KRCC1;C7ORF50;IFI16;HLTF;DARS;NOP58;JUN;TRMT10C;API5;FUS;SORBS2;LSM5;MAGOHB;LSM3;BICC1;HNRNPM;UBE2N;SSBP1;SLIRP;RBM45;RAN
double-stranded RNA binding (GO:0003725)	50/1223	0.0133721	0.359384	0.0359466	0.517644	-3.61128	15.5811	FASTKD2;WDR3;FASTKD3;IFIT5;GPATCH4;HMGB1;SYNE1;MRPL3;MRPL1;SNRPD1;HMGN2;LBR;DDX18;NCOA5;EIF1AX;DNTTIP2;PTBP2;RPP25L;SFPQ;SUB1;SRSF3;KCTD12;CXORF57;SRSF7;SRSF8;HDAC2;DDX1;JAKMIP1;KRCC1;C7ORF50;IFI16;HLTF;DARS;NOP58;JUN;TRMT10C;API5;FUS;SORBS2;LSM5;MAGOHB;TUBB4B;LSM3;BICC1;HNRNPM;UBE2N;SSBP1;SLIRP;RBM45;RAN
21U-RNA binding (GO:0034583)	49/1199	0.0143435	0.359384	0.0379233	0.517644	-3.44587	14.6259	FASTKD2;WDR3;FASTKD3;IFIT5;GPATCH4;HMGB1;SYNE1;MRPL3;MRPL1;SNRPD1;HMGN2;LBR;DDX18;NCOA5;EIF1AX;DNTTIP2;PTBP2;RPP25L;SFPQ;SUB1;SRSF3;KCTD12;CXORF57;SRSF7;SRSF8;HDAC2;DDX1;JAKMIP1;KRCC1;C7ORF50;IFI16;HLTF;DARS;NOP58;JUN;TRMT10C;API5;FUS;SORBS2;LSM5;MAGOHB;LSM3;BICC1;HNRNPM;UBE2N;SSBP1;SLIRP;RBM45;RAN
alpha-aminoacyl-tRNA binding (GO:1904678)	49/1199	0.0143435	0.359384	0.0379233	0.517644	-3.43997	14.6008	FASTKD2;WDR3;FASTKD3;IFIT5;GPATCH4;HMGB1;SYNE1;MRPL3;MRPL1;SNRPD1;HMGN2;LBR;DDX18;NCOA5;EIF1AX;DNTTIP2;PTBP2;RPP25L;SFPQ;SUB1;SRSF3;KCTD12;CXORF57;SRSF7;SRSF8;HDAC2;DDX1;JAKMIP1;KRCC1;C7ORF50;IFI16;HLTF;DARS;NOP58;JUN;TRMT10C;API5;FUS;SORBS2;LSM5;MAGOHB;LSM3;BICC1;HNRNPM;UBE2N;SSBP1;SLIRP;RBM45;RAN
base pairing with RNA (GO:0000498)	49/1199	0.0143435	0.359384	0.0379233	0.517644	-3.43287	14.5707	FASTKD2;WDR3;FASTKD3;IFIT5;GPATCH4;HMGB1;SYNE1;MRPL3;MRPL1;SNRPD1;HMGN2;LBR;DDX18;NCOA5;EIF1AX;DNTTIP2;PTBP2;RPP25L;SFPQ;SUB1;SRSF3;KCTD12;CXORF57;SRSF7;SRSF8;HDAC2;DDX1;JAKMIP1;KRCC1;C7ORF50;IFI16;HLTF;DARS;NOP58;JUN;TRMT10C;API5;FUS;SORBS2;LSM5;MAGOHB;LSM3;BICC1;HNRNPM;UBE2N;SSBP1;SLIRP;RBM45;RAN
GU repeat RNA binding (GO:1990605)	49/1199	0.0143435	0.359384	0.0379233	0.517644	-3.42379	14.5321	FASTKD2;WDR3;FASTKD3;IFIT5;GPATCH4;HMGB1;SYNE1;MRPL3;MRPL1;SNRPD1;HMGN2;LBR;DDX18;NCOA5;EIF1AX;DNTTIP2;PTBP2;RPP25L;SFPQ;SUB1;SRSF3;KCTD12;CXORF57;SRSF7;SRSF8;HDAC2;DDX1;JAKMIP1;KRCC1;C7ORF50;IFI16;HLTF;DARS;NOP58;JUN;TRMT10C;API5;FUS;SORBS2;LSM5;MAGOHB;LSM3;BICC1;HNRNPM;UBE2N;SSBP1;SLIRP;RBM45;RAN
7S RNA binding (GO:0008312)	49/1200	0.0145453	0.359384	0.0383854	0.517644	-3.43452	14.5297	FASTKD2;WDR3;FASTKD3;IFIT5;GPATCH4;HMGB1;SYNE1;MRPL3;MRPL1;SNRPD1;HMGN2;LBR;DDX18;NCOA5;EIF1AX;DNTTIP2;PTBP2;RPP25L;SFPQ;SUB1;SRSF3;KCTD12;CXORF57;SRSF7;SRSF8;HDAC2;DDX1;JAKMIP1;KRCC1;C7ORF50;IFI16;HLTF;DARS;NOP58;JUN;TRMT10C;API5;FUS;SORBS2;LSM5;MAGOHB;LSM3;BICC1;HNRNPM;UBE2N;SSBP1;SLIRP;RBM45;RAN
BRE binding (GO:0042835)	49/1200	0.0145453	0.359384	0.0383854	0.517644	-3.42949	14.5084	FASTKD2;WDR3;FASTKD3;IFIT5;GPATCH4;HMGB1;SYNE1;MRPL3;MRPL1;SNRPD1;HMGN2;LBR;DDX18;NCOA5;EIF1AX;DNTTIP2;PTBP2;RPP25L;SFPQ;SUB1;SRSF3;KCTD12;CXORF57;SRSF7;SRSF8;HDAC2;DDX1;JAKMIP1;KRCC1;C7ORF50;IFI16;HLTF;DARS;NOP58;JUN;TRMT10C;API5;FUS;SORBS2;LSM5;MAGOHB;LSM3;BICC1;HNRNPM;UBE2N;SSBP1;SLIRP;RBM45;RAN
misfolded RNA binding (GO:0034336)	49/1199	0.0143435	0.359384	0.0379233	0.517644	-3.41557	14.4972	FASTKD2;WDR3;FASTKD3;IFIT5;GPATCH4;HMGB1;SYNE1;MRPL3;MRPL1;SNRPD1;HMGN2;LBR;DDX18;NCOA5;EIF1AX;DNTTIP2;PTBP2;RPP25L;SFPQ;SUB1;SRSF3;KCTD12;CXORF57;SRSF7;SRSF8;HDAC2;DDX1;JAKMIP1;KRCC1;C7ORF50;IFI16;HLTF;DARS;NOP58;JUN;TRMT10C;API5;FUS;SORBS2;LSM5;MAGOHB;LSM3;BICC1;HNRNPM;UBE2N;SSBP1;SLIRP;RBM45;RAN
N6-methyladenosine-containing RNA binding (GO:1990247)	49/1199	0.0143435	0.359384	0.0379233	0.517644	-3.41234	14.4835	FASTKD2;WDR3;FASTKD3;IFIT5;GPATCH4;HMGB1;SYNE1;MRPL3;MRPL1;SNRPD1;HMGN2;LBR;DDX18;NCOA5;EIF1AX;DNTTIP2;PTBP2;RPP25L;SFPQ;SUB1;SRSF3;KCTD12;CXORF57;SRSF7;SRSF8;HDAC2;DDX1;JAKMIP1;KRCC1;C7ORF50;IFI16;HLTF;DARS;NOP58;JUN;TRMT10C;API5;FUS;SORBS2;LSM5;MAGOHB;LSM3;BICC1;HNRNPM;UBE2N;SSBP1;SLIRP;RBM45;RAN
histone pre-mRNA DCP binding (GO:0071208)	49/1200	0.0145453	0.359384	0.0383854	0.517644	-3.42154	14.4748	FASTKD2;WDR3;FASTKD3;IFIT5;GPATCH4;HMGB1;SYNE1;MRPL3;MRPL1;SNRPD1;HMGN2;LBR;DDX18;NCOA5;EIF1AX;DNTTIP2;PTBP2;RPP25L;SFPQ;SUB1;SRSF3;KCTD12;CXORF57;SRSF7;SRSF8;HDAC2;DDX1;JAKMIP1;KRCC1;C7ORF50;IFI16;HLTF;DARS;NOP58;JUN;TRMT10C;API5;FUS;SORBS2;LSM5;MAGOHB;LSM3;BICC1;HNRNPM;UBE2N;SSBP1;SLIRP;RBM45;RAN
regulatory region RNA binding (GO:0001069)	49/1199	0.0143435	0.359384	0.0379233	0.517644	-3.40482	14.4516	FASTKD2;WDR3;FASTKD3;IFIT5;GPATCH4;HMGB1;SYNE1;MRPL3;MRPL1;SNRPD1;HMGN2;LBR;DDX18;NCOA5;EIF1AX;DNTTIP2;PTBP2;RPP25L;SFPQ;SUB1;SRSF3;KCTD12;CXORF57;SRSF7;SRSF8;HDAC2;DDX1;JAKMIP1;KRCC1;C7ORF50;IFI16;HLTF;DARS;NOP58;JUN;TRMT10C;API5;FUS;SORBS2;LSM5;MAGOHB;LSM3;BICC1;HNRNPM;UBE2N;SSBP1;SLIRP;RBM45;RAN
G-quadruplex RNA binding (GO:0002151)	49/1201	0.0147493	0.359384	0.0388518	0.517644	-3.42604	14.4461	FASTKD2;WDR3;FASTKD3;IFIT5;GPATCH4;HMGB1;SYNE1;MRPL3;MRPL1;SNRPD1;HMGN2;LBR;DDX18;NCOA5;EIF1AX;DNTTIP2;PTBP2;RPP25L;SFPQ;SUB1;SRSF3;KCTD12;CXORF57;SRSF7;SRSF8;HDAC2;DDX1;JAKMIP1;KRCC1;C7ORF50;IFI16;HLTF;DARS;NOP58;JUN;TRMT10C;API5;FUS;SORBS2;LSM5;MAGOHB;LSM3;BICC1;HNRNPM;UBE2N;SSBP1;SLIRP;RBM45;RAN
pre-mRNA binding (GO:0036002)	49/1200	0.0145453	0.359384	0.0383854	0.517644	-3.41188	14.4339	FASTKD2;WDR3;FASTKD3;IFIT5;GPATCH4;HMGB1;SYNE1;MRPL3;MRPL1;SNRPD1;HMGN2;LBR;DDX18;NCOA5;EIF1AX;DNTTIP2;PTBP2;RPP25L;SFPQ;SUB1;SRSF3;KCTD12;CXORF57;SRSF7;SRSF8;HDAC2;DDX1;JAKMIP1;KRCC1;C7ORF50;IFI16;HLTF;DARS;NOP58;JUN;TRMT10C;API5;FUS;SORBS2;LSM5;MAGOHB;LSM3;BICC1;HNRNPM;UBE2N;SSBP1;SLIRP;RBM45;RAN
ribonuclease P RNA binding (GO:0033204)	49/1199	0.0143435	0.359384	0.0379233	0.517644	-3.39744	14.4203	FASTKD2;WDR3;FASTKD3;IFIT5;GPATCH4;HMGB1;SYNE1;MRPL3;MRPL1;SNRPD1;HMGN2;LBR;DDX18;NCOA5;EIF1AX;DNTTIP2;PTBP2;RPP25L;SFPQ;SUB1;SRSF3;KCTD12;CXORF57;SRSF7;SRSF8;HDAC2;DDX1;JAKMIP1;KRCC1;C7ORF50;IFI16;HLTF;DARS;NOP58;JUN;TRMT10C;API5;FUS;SORBS2;LSM5;MAGOHB;LSM3;BICC1;HNRNPM;UBE2N;SSBP1;SLIRP;RBM45;RAN
RNA stem-loop binding (GO:0035613)	49/1200	0.0145453	0.359384	0.0383854	0.517644	-3.40704	14.4135	FASTKD2;WDR3;FASTKD3;IFIT5;GPATCH4;HMGB1;SYNE1;MRPL3;MRPL1;SNRPD1;HMGN2;LBR;DDX18;NCOA5;EIF1AX;DNTTIP2;PTBP2;RPP25L;SFPQ;SUB1;SRSF3;KCTD12;CXORF57;SRSF7;SRSF8;HDAC2;DDX1;JAKMIP1;KRCC1;C7ORF50;IFI16;HLTF;DARS;NOP58;JUN;TRMT10C;API5;FUS;SORBS2;LSM5;MAGOHB;LSM3;BICC1;HNRNPM;UBE2N;SSBP1;SLIRP;RBM45;RAN
pre-miRNA binding (GO:0070883)	49/1201	0.0147493	0.359384	0.0388518	0.517644	-3.41545	14.4014	FASTKD2;WDR3;FASTKD3;IFIT5;GPATCH4;HMGB1;SYNE1;MRPL3;MRPL1;SNRPD1;HMGN2;LBR;DDX18;NCOA5;EIF1AX;DNTTIP2;PTBP2;RPP25L;SFPQ;SUB1;SRSF3;KCTD12;CXORF57;SRSF7;SRSF8;HDAC2;DDX1;JAKMIP1;KRCC1;C7ORF50;IFI16;HLTF;DARS;NOP58;JUN;TRMT10C;API5;FUS;SORBS2;LSM5;MAGOHB;LSM3;BICC1;HNRNPM;UBE2N;SSBP1;SLIRP;RBM45;RAN
RNA binding (GO:0003723)	49/1199	0.0143435	0.359384	0.0379233	0.517644	-3.38789	14.3798	FASTKD2;WDR3;FASTKD3;IFIT5;GPATCH4;HMGB1;SYNE1;MRPL3;MRPL1;SNRPD1;HMGN2;LBR;DDX18;NCOA5;EIF1AX;DNTTIP2;PTBP2;RPP25L;SFPQ;SUB1;SRSF3;KCTD12;CXORF57;SRSF7;SRSF8;HDAC2;DDX1;JAKMIP1;KRCC1;C7ORF50;IFI16;HLTF;DARS;NOP58;JUN;TRMT10C;API5;FUS;SORBS2;LSM5;MAGOHB;LSM3;BICC1;HNRNPM;UBE2N;SSBP1;SLIRP;RBM45;RAN
AU-rich element binding (GO:0017091)	49/1203	0.0151646	0.359384	0.0397979	0.517644	-3.43137	14.3733	FASTKD2;WDR3;FASTKD3;IFIT5;GPATCH4;HMGB1;SYNE1;MRPL3;MRPL1;SNRPD1;HMGN2;LBR;DDX18;NCOA5;EIF1AX;DNTTIP2;PTBP2;RPP25L;SFPQ;SUB1;SRSF3;KCTD12;CXORF57;SRSF7;SRSF8;HDAC2;DDX1;JAKMIP1;KRCC1;C7ORF50;IFI16;HLTF;DARS;NOP58;JUN;TRMT10C;API5;FUS;SORBS2;LSM5;MAGOHB;LSM3;BICC1;HNRNPM;UBE2N;SSBP1;SLIRP;RBM45;RAN
telomeric repeat-containing RNA binding (GO:0061752)	49/1200	0.0145453	0.359384	0.0383854	0.517644	-3.39721	14.3719	FASTKD2;WDR3;FASTKD3;IFIT5;GPATCH4;HMGB1;SYNE1;MRPL3;MRPL1;SNRPD1;HMGN2;LBR;DDX18;NCOA5;EIF1AX;DNTTIP2;PTBP2;RPP25L;SFPQ;SUB1;SRSF3;KCTD12;CXORF57;SRSF7;SRSF8;HDAC2;DDX1;JAKMIP1;KRCC1;C7ORF50;IFI16;HLTF;DARS;NOP58;JUN;TRMT10C;API5;FUS;SORBS2;LSM5;MAGOHB;LSM3;BICC1;HNRNPM;UBE2N;SSBP1;SLIRP;RBM45;RAN
DNA binding, bending (GO:0008301)	24/490	0.0117025	0.359384	0.0253949	0.517644	-3.23006	14.3672	CEBPA;EGR1;JUN;DENND4A;GTF3C6;VDR;SETMAR;HMGA2;HOXD13;YEATS4;HMGB1;PBX1;FOXP2;FLI1;KIF15;SOX2;POLA1;SFPQ;BRIP1;MECOM;MYC;HLTF;ALX4;ZNF268
snRNA binding (GO:0017069)	49/1202	0.0149558	0.359384	0.0393226	0.517644	-3.41807	14.365	FASTKD2;WDR3;FASTKD3;IFIT5;GPATCH4;HMGB1;SYNE1;MRPL3;MRPL1;SNRPD1;HMGN2;LBR;DDX18;NCOA5;EIF1AX;DNTTIP2;PTBP2;RPP25L;SFPQ;SUB1;SRSF3;KCTD12;CXORF57;SRSF7;SRSF8;HDAC2;DDX1;JAKMIP1;KRCC1;C7ORF50;IFI16;HLTF;DARS;NOP58;JUN;TRMT10C;API5;FUS;SORBS2;LSM5;MAGOHB;LSM3;BICC1;HNRNPM;UBE2N;SSBP1;SLIRP;RBM45;RAN
RNA cap binding (GO:0000339)	49/1201	0.0147493	0.359384	0.0388518	0.517644	-3.40602	14.3617	FASTKD2;WDR3;FASTKD3;IFIT5;GPATCH4;HMGB1;SYNE1;MRPL3;MRPL1;SNRPD1;HMGN2;LBR;DDX18;NCOA5;EIF1AX;DNTTIP2;PTBP2;RPP25L;SFPQ;SUB1;SRSF3;KCTD12;CXORF57;SRSF7;SRSF8;HDAC2;DDX1;JAKMIP1;KRCC1;C7ORF50;IFI16;HLTF;DARS;NOP58;JUN;TRMT10C;API5;FUS;SORBS2;LSM5;MAGOHB;LSM3;BICC1;HNRNPM;UBE2N;SSBP1;SLIRP;RBM45;RAN
piRNA binding (GO:0034584)	49/1202	0.0149558	0.359384	0.0393226	0.517644	-3.41526	14.3532	FASTKD2;WDR3;FASTKD3;IFIT5;GPATCH4;HMGB1;SYNE1;MRPL3;MRPL1;SNRPD1;HMGN2;LBR;DDX18;NCOA5;EIF1AX;DNTTIP2;PTBP2;RPP25L;SFPQ;SUB1;SRSF3;KCTD12;CXORF57;SRSF7;SRSF8;HDAC2;DDX1;JAKMIP1;KRCC1;C7ORF50;IFI16;HLTF;DARS;NOP58;JUN;TRMT10C;API5;FUS;SORBS2;LSM5;MAGOHB;LSM3;BICC1;HNRNPM;UBE2N;SSBP1;SLIRP;RBM45;RAN
75-2 vs control
GO_Molecular_Function_2017b	http://amp,pharm,mssm,edu/Enrichr/export?userListId=17280677&filename=temp_out&backgroundType=GO_Molecular_Function_2017b
arabinose efflux transmembrane transporter activity (GO:0015523)	3/7	0.000387393	0.0470897	0.0012563	0.15271	-1.5511	12.1855	SLC2A10;SLC2A13;SLC2A12
actin lateral binding (GO:0003786)	8/109	0.00355535	0.150465	0.0053217	0.232877	-2.14734	12.1095	MYO1D;MACF1;MYO7A;OBSL1;MYH10;SPTB;EGFR;SYNE1
actin filament binding (GO:0051015)	11/208	0.00855668	0.222244	0.0118601	0.265832	-2.45414	11.6843	MYO1D;MACF1;GSN;MYO7A;UTRN;OBSL1;MYH10;SPTB;EGFR;NCALD;SYNE1
D-xylose:proton symporter activity (GO:0015519)	3/7	0.000387393	0.0470897	0.0012563	0.15271	-1.43413	11.2666	SLC2A10;SLC2A13;SLC2A12
arabinose:proton symporter activity (GO:0015518)	3/7	0.000387393	0.0470897	0.0012563	0.15271	-1.42622	11.2045	SLC2A10;SLC2A13;SLC2A12
hexuronate:cation symporter activity (GO:0015539)	3/7	0.000387393	0.0470897	0.0012563	0.15271	-1.39864	10.9879	SLC2A10;SLC2A13;SLC2A12
lactose:proton symporter activity (GO:0015528)	3/7	0.000387393	0.0470897	0.0012563	0.15271	-1.38306	10.8655	SLC2A10;SLC2A13;SLC2A12
spectrin binding (GO:0030507)	4/19	0.000793997	0.0702119	0.00167359	0.154837	-1.51879	10.8418	ANK2;MYO7A;ANK3;ANK1
ankyrin binding (GO:0030506)	4/18	0.000638286	0.0634805	0.00140752	0.153983	-1.45321	10.6908	CDH1;SCN5A;SPTB;SLC8A1
raffinose:proton symporter activity (GO:0015529)	3/7	0.000387393	0.0470897	0.0012563	0.15271	-1.32477	10.4075	SLC2A10;SLC2A13;SLC2A12
maltose:proton symporter activity (GO:0005364)	3/7	0.000387393	0.0470897	0.0012563	0.15271	-1.28071	10.0614	SLC2A10;SLC2A13;SLC2A12
collagen binding (GO:0005518)	5/49	0.00508477	0.198669	0.00760634	0.265832	-1.81098	9.56473	COL14A1;ITGA2;ADGRG6;FN1;NID2
collagen V binding (GO:0070052)	5/51	0.00603581	0.199898	0.00885636	0.265832	-1.82665	9.33428	COL14A1;ITGA2;ADGRG6;FN1;NID2
sugar efflux transmembrane transporter activity (GO:0015542)	3/7	0.000387393	0.0470897	0.0012563	0.15271	-1.18755	9.32949	SLC2A10;SLC2A13;SLC2A12
collagen binding involved in cell-matrix adhesion (GO:0098639)	5/50	0.00554592	0.199898	0.00821487	0.265832	-1.79327	9.31547	COL14A1;ITGA2;ADGRG6;FN1;NID2
trehalose:proton symporter activity (GO:0044693)	3/7	0.000387393	0.0470897	0.0012563	0.15271	-1.18573	9.31517	SLC2A10;SLC2A13;SLC2A12
calcium ion binding (GO:0005509)	12/273	0.0236721	0.222244	0.0306355	0.265832	-2.40853	9.01623	GSN;SYT2;PCLO;LRP1;IGFBP3;ITPR2;ENPP1;SLIT2;SYTL4;SLC8A1;SLC25A24;ADGRL3
cytoskeletal adaptor activity (GO:0008093)	3/9	0.000898507	0.0702119	0.00222652	0.173987	-1.25455	8.80036	SORBS2;OBSL1;ANK1
microtubule cortical anchor activity (GO:0106006)	3/9	0.000898507	0.0702119	0.00222652	0.173987	-1.20407	8.44631	SORBS2;OBSL1;ANK1
metallopeptidase activity (GO:0008237)	5/46	0.00386459	0.156587	0.00596995	0.251197	-1.51176	8.39919	ADAMTS5;ENPEP;ERAP2;ADAM12;ADAMTS9
calcium ion binding involved in regulation of cytosolic calcium ion concentration (GO:0099510)	11/248	0.0278806	0.222244	0.0356119	0.265832	-2.19887	7.87157	GSN;SYT2;PCLO;LRP1;ITPR2;ENPP1;SLIT2;SYTL4;SLC8A1;SLC25A24;ADGRL3
calcium ion sensor activity (GO:0061891)	11/248	0.0278806	0.222244	0.0356119	0.265832	-2.19183	7.84638	GSN;SYT2;PCLO;LRP1;ITPR2;ENPP1;SLIT2;SYTL4;SLC8A1;SLC25A24;ADGRL3
microfilament motor activity (GO:0000146)	4/32	0.00582986	0.199898	0.00883145	0.265832	-1.50857	7.76122	MYO5B;MYO7A;KIF3C;MYH10
metalloexopeptidase activity (GO:0008235)	5/56	0.00894765	0.222244	0.0125871	0.265832	-1.60003	7.5463	ADAMTS5;ENPEP;ERAP2;ADAM12;ADAMTS9
actin binding (GO:0003779)	7/125	0.0248031	0.222244	0.0316708	0.265832	-1.96764	7.27393	MACF1;GSN;UTRN;MYH10;SPTB;NCALD;SYNE1
hexose:proton symporter activity (GO:0009679)	3/8	0.000609322	0.0634805	0.00169839	0.154837	-0.924597	6.84494	SLC2A10;SLC2A13;SLC2A12
bioactive lipid receptor activity (GO:0045125)	7/128	0.0277692	0.222244	0.0351595	0.265832	-1.90856	6.83995	GPR173;GPR37;GPR161;ADGRG6;CELSR1;CELSR2;ADGRL3
Rab GTPase binding (GO:0017137)	7/126	0.0257665	0.222244	0.0328067	0.265832	-1.86775	6.8335	TBC1D8B;TBC1D5;MYO5B;RIN3;STXBP5;HPS6;ERC1
ecdysis-triggering hormone receptor activity (GO:0042654)	7/128	0.0277692	0.222244	0.0351595	0.265832	-1.90629	6.83182	GPR173;GPR37;GPR161;ADGRG6;CELSR1;CELSR2;ADGRL3
G-protein coupled amine receptor activity (GO:0008227)	7/128	0.0277692	0.222244	0.0351595	0.265832	-1.90409	6.82392	GPR173;GPR37;GPR161;ADGRG6;CELSR1;CELSR2;ADGRL3
77-1 vs control
GO_Molecular_Function_2017b	http://amp,pharm,mssm,edu/Enrichr/export?userListId=17280826&filename=temp_out&backgroundType=GO_Molecular_Function_2017b
peptide N-acetyltransferase activity (GO:0034212)	3/8	0.00201902	0.225375	0.00569345	0.42994	-2.05649	12.7608	NAT10;EP300;ESCO2
lysine N-acetyltransferase activity, acting on acetyl phosphate as donor (GO:0004468)	3/10	0.00410817	0.225375	0.00936868	0.42994	-2.24072	12.3123	NAT10;EP300;ESCO2
base pairing with tRNA (GO:0000946)	5/31	0.00391139	0.225375	0.00789323	0.42994	-1.82278	10.1052	AARS2;DARS2;NAT10;FARS2;ALKBH8
methionyl-initiator methionine tRNA binding (GO:1990856)	5/31	0.00391139	0.225375	0.00789323	0.42994	-1.81663	10.0711	AARS2;DARS2;NAT10;FARS2;ALKBH8
N-acetyltransferase activity (GO:0008080)	4/17	0.00234685	0.225375	0.00551133	0.42994	-1.6012	9.69477	KAT6A;NAT10;EP300;ESCO2
voltage-gated sodium channel activity (GO:0005248)	5/30	0.00337493	0.225375	0.00699316	0.42994	-1.69443	9.64365	SCN8A;SCN5A;PKD2;SCN4B;NALCN
RNA polymerase II transcription coactivator activity involved in preinitiation complex assembly (GO:0001128)	5/32	0.00450616	0.225375	0.00887073	0.42994	-1.77809	9.6058	NCOA1;MKL2;CITED2;ANKRD1;HIPK2
phosphatidylethanolamine-translocating ATPase activity (GO:0090555)	4/16	0.00184463	0.225375	0.00458627	0.42994	-1.50671	9.48547	ATP8A2;ATP11A;ATP9B;ATP9A
tRNA binding (GO:0000049)	54/1219	0.036251	0.433401	0.0756126	0.52175	-2.79377	9.26775	POP7;FASTKD2;ZC3H4;COL14A1;POP1;FASTKD3;NAT10;GPATCH4;FARS2;ALKBH8;SYNE1;TRIM25;ZNF385B;UTP14A;TNS1;DDX18;TSFM;NCOA5;PUS1;DARS2;DIEXF;RPUSD2;CCDC86;SRSF3;KCTD12;SRSF8;DDX28;RNASEL;AARS2;LRP1;YTHDC2;NOP2;SAMHD1;JAKMIP1;KRCC1;RRP7A;HELZ2;C7ORF50;RBM15B;DHX33;IFI16;RRS1;UTP20;NOP14;FUS;ADAT1;SORBS2;MAGOHB;PARP12;BICC1;HNRNPM;EPPK1;TRIM32;TNRC6A
phosphatidylserine-translocating ATPase activity (GO:0090556)	4/16	0.00184463	0.225375	0.00458627	0.42994	-1.46049	9.19449	ATP8A2;ATP11A;ATP9B;ATP9A
ceramide-translocating ATPase activity (GO:0099038)	4/16	0.00184463	0.225375	0.00458627	0.42994	-1.45486	9.15904	ATP8A2;ATP11A;ATP9B;ATP9A
12-hydroxyjasmonate sulfotransferase activity (GO:0102055)	4/22	0.00629066	0.225375	0.0120005	0.42994	-1.57058	7.96081	CHST10;CHST4;HS6ST1;CHST3
5,8S rRNA binding (GO:1990932)	4/20	0.00440048	0.225375	0.0090102	0.42994	-1.46684	7.95916	DDX28;FASTKD2;MRPL16;DIEXF
phosphatidylcholine-translocating ATPase activity (GO:0090554)	4/20	0.00440048	0.225375	0.0090102	0.42994	-1.46262	7.93624	ATP8A2;ATP11A;ATP9B;ATP9A
large ribosomal subunit rRNA binding (GO:0070180)	4/21	0.00528933	0.225375	0.0104362	0.42994	-1.50818	7.90596	DDX28;FASTKD2;MRPL16;DIEXF
base pairing with rRNA (GO:0000944)	4/20	0.00440048	0.225375	0.0090102	0.42994	-1.45502	7.89502	DDX28;FASTKD2;MRPL16;DIEXF
11-hydroxyjasmonate sulfotransferase activity (GO:0102056)	4/22	0.00629066	0.225375	0.0120005	0.42994	-1.55539	7.8838	CHST10;CHST4;HS6ST1;CHST3
1-hydroxypyrene sulfotransferase activity (GO:0034930)	4/22	0.00629066	0.225375	0.0120005	0.42994	-1.55096	7.86135	CHST10;CHST4;HS6ST1;CHST3
[dermatan sulfate]-L-iduronyl 2-Osulfotransferase activity (GO:0102142)	4/22	0.00629066	0.225375	0.0120005	0.42994	-1.54678	7.84017	CHST10;CHST4;HS6ST1;CHST3
6-methylthiohexyldesulfoglucosinolate sulfotransferase activity (GO:0103104)	4/22	0.00629066	0.225375	0.0120005	0.42994	-1.54565	7.83443	CHST10;CHST4;HS6ST1;CHST3
[chondroitin sulfate]-D-glucuronyl 2-O-sulfotransferase activity (GO:0102141)	4/22	0.00629066	0.225375	0.0120005	0.42994	-1.54161	7.81392	CHST10;CHST4;HS6ST1;CHST3
amine sulfotransferase activity (GO:0047685)	4/22	0.00629066	0.225375	0.0120005	0.42994	-1.53427	7.77675	CHST10;CHST4;HS6ST1;CHST3
arylsulfate sulfotransferase activity (GO:0047686)	4/22	0.00629066	0.225375	0.0120005	0.42994	-1.51823	7.69542	CHST10;CHST4;HS6ST1;CHST3
brassinosteroid sulfotransferase activity (GO:0080118)	4/22	0.00629066	0.225375	0.0120005	0.42994	-1.50175	7.61191	CHST10;CHST4;HS6ST1;CHST3
bile-salt sulfotransferase activity (GO:0047704)	4/22	0.00629066	0.225375	0.0120005	0.42994	-1.48707	7.53747	CHST10;CHST4;HS6ST1;CHST3
chondroitin sulfotransferase activity (GO:0034481)	4/22	0.00629066	0.225375	0.0120005	0.42994	-1.47242	7.46322	CHST10;CHST4;HS6ST1;CHST3
cortisol sulfotransferase activity (GO:0047785)	4/22	0.00629066	0.225375	0.0120005	0.42994	-1.47032	7.4526	CHST10;CHST4;HS6ST1;CHST3
choline sulfotransferase activity (GO:0047754)	4/22	0.00629066	0.225375	0.0120005	0.42994	-1.46968	7.44933	CHST10;CHST4;HS6ST1;CHST3
dermatan 6-sulfotransferase activity (GO:0036443)	4/22	0.00629066	0.225375	0.0120005	0.42994	-1.45284	7.36399	CHST10;CHST4;HS6ST1;CHST3
flavonoid sulfotransferase activity (GO:1990135)	4/22	0.00629066	0.225375	0.0120005	0.42994	-1.44277	7.31294	CHST10;CHST4;HS6ST1;CHST3
80-1 vs control
GO_Molecular_Function_2017b	http://amp,pharm,mssm,edu/Enrichr/export?userListId=17280842&filename=temp_out&backgroundType=GO_Molecular_Function_2017b
calcium ion binding involved in regulation of cytosolic calcium ion concentration (GO:0099510)	13/248	0.00147206	0.0876838	0.00408192	0.243141	-2.69979	17.6056	CETN2;ITPR2;PKD2;SYTL5;SYTL4;EML1;SLC8A1;PPP3CA;S100A16;MAN1C1;ENPP2;SLC25A24;ADGRL3
calcium ion sensor activity (GO:0061891)	13/248	0.00147206	0.0876838	0.00408192	0.243141	-2.69264	17.559	CETN2;ITPR2;PKD2;SYTL5;SYTL4;EML1;SLC8A1;PPP3CA;S100A16;MAN1C1;ENPP2;SLC25A24;ADGRL3
calcium ion binding (GO:0005509)	13/273	0.00339698	0.172365	0.00863377	0.294418	-2.71857	15.4547	CETN2;ITPR2;PKD2;SYTL5;SYTL4;EML1;SLC8A1;PPP3CA;S100A16;MAN1C1;ENPP2;SLC25A24;ADGRL3
protein homodimerization activity (GO:0042803)	20/582	0.0131199	0.198822	0.033884	0.294418	-3.10833	13.4703	CEBPA;MTMR1;JUN;GYPC;GLDC;BNIP3;DARS2;PKD2;CLN6;GHR;PEX7;SFPQ;S100A16;CBS;STK26;FBXO4;HPRT1;PLCB1;ABCD1;S100A11
2-carboxybenzaldehyde dehydrogenase activity (GO:0018474)	4/13	9.57937e-05	0.00729096	0.00039262	0.0298828	-1.41601	13.1028	ALDH4A1;ALDH1B1;ALDH1A2;ALDH1L2
2-naphthaldehyde dehydrogenase activity (GO:0034520)	4/13	9.57937e-05	0.00729096	0.00039262	0.0298828	-1.41457	13.0895	ALDH4A1;ALDH1B1;ALDH1A2;ALDH1L2
2-oxoaldehyde dehydrogenase (NAD) activity (GO:0047551)	4/13	9.57937e-05	0.00729096	0.00039262	0.0298828	-1.41154	13.0614	ALDH4A1;ALDH1B1;ALDH1A2;ALDH1L2
aldehyde dehydrogenase (NAD) activity (GO:0004029)	4/14	0.000132009	0.00904263	0.000496366	0.0340011	-1.44844	12.9384	ALDH4A1;ALDH1B1;ALDH1A2;ALDH1L2
formaldehyde dehydrogenase activity (GO:0018467)	4/14	0.000132009	0.00904263	0.000496366	0.0340011	-1.44634	12.9196	ALDH4A1;ALDH1B1;ALDH1A2;ALDH1L2
4-hydroxymethylsalicyaldehyde dehydrogenase activity (GO:0034530)	4/13	9.57937e-05	0.00729096	0.00039262	0.0298828	-1.39283	12.8883	ALDH4A1;ALDH1B1;ALDH1A2;ALDH1L2
4-hydroxybenzaldehyde dehydrogenase activity (GO:0018484)	4/13	9.57937e-05	0.00729096	0.00039262	0.0298828	-1.37609	12.7334	ALDH4A1;ALDH1B1;ALDH1A2;ALDH1L2
4-hydroxyphenylacetaldehyde dehydrogenase activity (GO:0047106)	4/13	9.57937e-05	0.00729096	0.00039262	0.0298828	-1.34479	12.4437	ALDH4A1;ALDH1B1;ALDH1A2;ALDH1L2
protein kinase binding (GO:0019901)	14/352	0.0113262	0.198822	0.0259578	0.294418	-2.76219	12.3764	CEBPA;SMAD1;NEK9;ANK2;VRK1;GHR;GYS1;POLA1;PFKL;CCND1;DLG3;CTNNB1;CSPG4;SCN5A
aryl-aldehyde dehydrogenase (NAD) activity (GO:0019108)	4/13	9.57937e-05	0.00729096	0.00039262	0.0298828	-1.33354	12.3397	ALDH4A1;ALDH1B1;ALDH1A2;ALDH1L2
betaine-aldehyde dehydrogenase activity (GO:0008802)	4/13	9.57937e-05	0.00729096	0.00039262	0.0298828	-1.33343	12.3386	ALDH4A1;ALDH1B1;ALDH1A2;ALDH1L2
benzaldehyde dehydrogenase (NAD+) activity (GO:0018479)	4/13	9.57937e-05	0.00729096	0.00039262	0.0298828	-1.31722	12.1886	ALDH4A1;ALDH1B1;ALDH1A2;ALDH1L2
aminobutyraldehyde dehydrogenase activity (GO:0019145)	4/13	9.57937e-05	0.00729096	0.00039262	0.0298828	-1.31637	12.1808	ALDH4A1;ALDH1B1;ALDH1A2;ALDH1L2
glycolaldehyde dehydrogenase activity (GO:0050569)	4/13	9.57937e-05	0.00729096	0.00039262	0.0298828	-1.31192	12.1396	ALDH4A1;ALDH1B1;ALDH1A2;ALDH1L2
fluoroacetaldehyde dehydrogenase activity (GO:0033723)	4/13	9.57937e-05	0.00729096	0.00039262	0.0298828	-1.29605	11.9927	ALDH4A1;ALDH1B1;ALDH1A2;ALDH1L2
phosphoglycerate kinase activity (GO:0004618)	5/62	0.00778126	0.198822	0.01424	0.294418	-2.44146	11.8558	BCKDK;RPS6KA2;PGK1;NEK1;PRKACB
gamma-guanidinobutyraldehyde dehydrogenase activity (GO:0047107)	4/13	9.57937e-05	0.00729096	0.00039262	0.0298828	-1.26926	11.7449	ALDH4A1;ALDH1B1;ALDH1A2;ALDH1L2
lactaldehyde dehydrogenase activity (GO:0008911)	4/13	9.57937e-05	0.00729096	0.00039262	0.0298828	-1.26615	11.7161	ALDH4A1;ALDH1B1;ALDH1A2;ALDH1L2
long-chain-aldehyde dehydrogenase activity (GO:0050061)	4/13	9.57937e-05	0.00729096	0.00039262	0.0298828	-1.24071	11.4806	ALDH4A1;ALDH1B1;ALDH1A2;ALDH1L2
trimethyllysine dioxygenase activity (GO:0050353)	3/15	0.00297845	0.156941	0.00624999	0.294418	-1.95105	11.348	EGLN1;EGLN3;TMLHE
medium-chain-aldehyde dehydrogenase activity (GO:0052814)	4/13	9.57937e-05	0.00729096	0.00039262	0.0298828	-1.22433	11.3291	ALDH4A1;ALDH1B1;ALDH1A2;ALDH1L2
phytanoyl-CoA dioxygenase activity (GO:0048244)	3/15	0.00297845	0.156941	0.00624999	0.294418	-1.92768	11.2121	EGLN1;PHYH;EGLN3
phenylacetaldehyde dehydrogenase activity (GO:0008957)	4/13	9.57937e-05	0.00729096	0.00039262	0.0298828	-1.18884	11.0007	ALDH4A1;ALDH1B1;ALDH1A2;ALDH1L2
salicylaldehyde dehydrogenase activity (GO:0018485)	4/13	9.57937e-05	0.00729096	0.00039262	0.0298828	-1.18846	10.9972	ALDH4A1;ALDH1B1;ALDH1A2;ALDH1L2
protein kinase activity (GO:0004672)	9/204	0.0213419	0.198822	0.0398774	0.294418	-2.532	9.7408	BCKDK;SYK;RPS6KA2;STK26;NEK1;VRK1;IKBKE;PRKACB;PDK1
gamma-tubulin binding (GO:0043015)	5/57	0.00545653	0.198822	0.0103936	0.294418	-1.85858	9.68495	MAP7D3;GPAA1;PHF6;EML1;NDRG1

## Sheet: Panther_2016 
	Overlap	P-value	Adjusted_P-value	Old_P-value	Old_Adjusted_P-value	Z-score	Combined_Score	Gene_List
74-4 vs control
Panther_2016	http://amp,pharm,mssm,edu/Enrichr/export?userListId=17280594&filename=temp_out&backgroundType=Panther_2016
Heme biosynthesis_Homo sapiens_P02746	3/11	0.00358168	0.254299	0.0163138	0.855691	-1.26482	7.12337	FECH;HMBS;CPOX
PDGF signaling pathway_Homo sapiens_P00047	8/112	0.0183871	0.32562	0.10258	0.855691	-1.45825	5.82732	JUN;RPS6KA6;MYCBP;MYC;RPS6KA2;FOS;RERG;FLI1
Insulin/IGF pathway-mitogen activated protein kinase kinase/MAP kinase cascade_Homo sapiens_P00032	4/29	0.0100869	0.32562	0.0402349	0.855691	-1.25336	5.76111	RPS6KA6;RPS6KA2;IRS4;FOS
CCKR signaling map ST_Homo sapiens_P06959	10/165	0.0255254	0.32562	0.155919	0.855691	-1.4257	5.2296	PPP3CA;JUN;GNG2;CDH1;MYC;CTNNB1;FOS;PLCB1;CALM1;PRKACB
Wnt signaling pathway_Homo sapiens_P00057	14/278	0.0383969	0.389455	0.270812	0.855691	-1.20133	3.91607	SMAD1;HDAC2;FZD6;FZD10;PCDH19;PPP3CA;CDH4;GNG2;APC;CDH1;MYC;HLTF;CTNNB1;PLCB1
Huntington disease_Homo sapiens_P00029	7/124	0.0760981	0.505522	0.266834	0.855691	-0.784888	2.02166	JUN;CASP8;ARPC5;FOS;DYNLL1;IFT57;TUBB4B
Toll receptor signaling pathway_Homo sapiens_P00054	4/49	0.0568442	0.498061	0.159228	0.855691	-0.683094	1.95873	JUN;UBE2N;IRAK4;IKBKE
B cell activation_Homo sapiens_P00010	4/57	0.0884749	0.505522	0.225062	0.855691	-0.606546	1.4709	PPP3CA;JUN;SYK;FOS
FAS signaling pathway_Homo sapiens_P00020	3/31	0.0631345	0.498061	0.152274	0.855691	-0.231219	0.63874	JUN;CASP8;FADD
TGF-beta signaling pathway_Homo sapiens_P00052	5/88	0.120437	0.505522	0.31369	0.855691	-0.0801811	0.169714	SMAD1;BMP2;JUN;CITED2;INHBA
Ubiquitin proteasome pathway_Homo sapiens_P00060	3/43	0.134454	0.505522	0.278332	0.855691	0.385385	-0.773287	UBE2E1;UBA3;UBE2N
Interleukin signaling pathway_Homo sapiens_P00036	4/86	0.251424	0.615243	0.489637	0.855691	0.896428	-1.23762	RPS6KA6;MYC;RPS6KA2;FOS
Metabotropic glutamate receptor group III pathway_Homo sapiens_P00039	1/54	0.803581	0.803581	0.897073	0.897073	5.96096	-1.30352	PRKACB
Dopamine receptor mediated signaling pathway_Homo sapiens_P05912	1/52	0.791361	0.802666	0.888081	0.897073	5.61184	-1.31318	PRKACB
Integrin signalling pathway_Homo sapiens_P00034	6/156	0.317352	0.646476	0.640532	0.855691	1.18005	-1.3544	ITGA4;COL5A2;ITGA8;COL4A5;ARPC5;RND2
Alzheimer disease-presenilin pathway_Homo sapiens_P00004	5/99	0.170881	0.505522	0.403176	0.855691	0.782374	-1.38229	CDH1;TRPC1;FZD6;CTNNB1;FZD10
Heterotrimeric G-protein signaling pathway-Gi alpha and Gs alpha mediated pathway_Homo sapiens_P00026	5/127	0.324596	0.646476	0.617788	0.855691	1.28196	-1.44243	GNG2;RGS16;PHKB;PRKACB;GTF2H5
Cadherin signaling pathway_Homo sapiens_P00012	6/150	0.286314	0.646476	0.602693	0.855691	1.16691	-1.45941	CDH4;CDH1;FZD6;CTNNB1;FZD10;PCDH19
5HT2 type receptor mediated signaling pathway_Homo sapiens_P04374	1/46	0.749954	0.771692	0.856182	0.880999	5.61281	-1.61505	PLCB1
Vitamin D metabolism and pathway_Homo sapiens_P04396	2/8	0.0218258	0.32562	0.0577119	0.855691	0.47585	-1.81996	VDR;FDX1
Ras Pathway_Homo sapiens_P04393	3/69	0.335907	0.646476	0.556699	0.855691	1.74415	-1.90273	JUN;RPS6KA6;RPS6KA2
Heterotrimeric G-protein signaling pathway-Gq alpha and Go alpha mediated pathway_Homo sapiens_P00027	3/106	0.61236	0.708561	0.823013	0.859322	4.06565	-1.99393	GNG2;RGS16;PLCB1
Inflammation mediated by chemokine and cytokine signaling pathway_Homo sapiens_P00031	6/188	0.485668	0.703964	0.804051	0.855691	2.79225	-2.01665	JUN;GNG2;CXCR4;ARPC5;PLCB1;PRKACB
p53 pathway_Homo sapiens_P00059	3/71	0.352207	0.646476	0.575696	0.855691	2.03276	-2.12126	KAT2B;PMAIP1;HMGB1
Apoptosis signaling pathway_Homo sapiens_P00006	4/102	0.358274	0.646476	0.62196	0.855691	2.08272	-2.13782	JUN;CASP8;FADD;FOS
T cell activation_Homo sapiens_P00053	3/73	0.368458	0.646476	0.594192	0.855691	2.17254	-2.16913	PPP3CA;JUN;FOS
Endothelin signaling pathway_Homo sapiens_P00019	3/75	0.384636	0.646476	0.612172	0.855691	2.27386	-2.17258	EDNRA;PLCB1;PRKACB
Angiogenesis_Homo sapiens_P00005	5/142	0.412907	0.651476	0.712828	0.855691	2.55764	-2.26231	EFNB1;JUN;APC;CTNNB1;FOS
Muscarinic acetylcholine receptor 2 and 4 signaling pathway_Homo sapiens_P00043	1/39	0.691173	0.721666	0.807483	0.855691	6.13873	-2.26743	PRKACB
Thyrotropin-releasing hormone receptor signaling pathway_Homo sapiens_P04394	2/41	0.344247	0.646476	0.5194	0.855691	2.22678	-2.37463	PLCB1;CGA
75-2 vs control
Panther_2016	http://amp,pharm,mssm,edu/Enrichr/export?userListId=17280677&filename=temp_out&backgroundType=Panther_2016
Cadherin signaling pathway_Homo sapiens_P00012	15/150	1.86497e-06	0.000117493	8.86407e-05	0.00558436	-1.59987	21.1059	FZD3;WNT2B;PCDH9;PCDH10;PCDH20;PCDH19;CELSR1;PCDH18;CELSR2;EGFR;CDH4;CDH1;FAT1;DCHS1;FAT3
Wnt signaling pathway_Homo sapiens_P00057	19/278	2.36776e-05	0.000745845	0.00101073	0.031838	-1.68258	17.9211	FZD3;WNT2B;PRKCH;PCDH9;PCDH10;PCDH20;KREMEN1;ITPR2;ARRB1;PCDH19;CELSR1;PCDH18;CELSR2;CDH4;GNG2;CDH1;FAT1;DCHS1;FAT3
Integrin signalling pathway_Homo sapiens_P00034	11/156	0.000940038	0.0148056	0.0114757	0.180743	-1.49454	10.4163	COL1A1;COL2A1;COL14A1;ITGA2;COL5A2;COL12A1;LAMA3;FN1;ITGA8;COL4A5;SOS1
Insulin/IGF pathway-mitogen activated protein kinase kinase/MAP kinase cascade_Homo sapiens_P00032	5/29	0.000459986	0.0096597	0.00333773	0.0700924	-1.09918	8.44642	RPS6KA6;RPS6KA2;IRS4;SOS1;IGF2R
Angiogenesis_Homo sapiens_P00005	8/142	0.0164816	0.207669	0.0865892	0.740734	-1.27866	5.24957	NOTCH2;PDGFRA;JUN;FZD3;WNT2B;PRKCH;PLD1;SOS1
Ras Pathway_Homo sapiens_P04393	5/69	0.0207271	0.217634	0.0752015	0.740734	-1.15693	4.48463	JUN;RPS6KA6;RPS6KA2;PLD1;SOS1
Endothelin signaling pathway_Homo sapiens_P00019	5/75	0.0285259	0.230018	0.0976097	0.740734	-1.14091	4.05814	GUCY1A2;EDNRA;PRKCH;ITPR2;PRKACB
Inflammation mediated by chemokine and cytokine signaling pathway_Homo sapiens_P00031	9/188	0.0292086	0.230018	0.147573	0.740734	-1.12388	3.97101	JUN;GNG2;COL14A1;COL12A1;ITPR2;ARRB1;SOS1;PRKACB;MYH10
B cell activation_Homo sapiens_P00010	4/57	0.0411366	0.274846	0.116488	0.740734	-0.823046	2.62622	JUN;SYK;ITPR2;SOS1
PDGF signaling pathway_Homo sapiens_P00047	6/112	0.0436263	0.274846	0.152994	0.740734	-0.790558	2.4761	PDGFRA;JUN;RPS6KA6;RPS6KA2;ITPR2;SOS1
CCKR signaling map ST_Homo sapiens_P06959	7/165	0.0849104	0.411489	0.277514	0.740734	-0.654979	1.61528	JUN;PRKCH;GNG2;CCKBR;CDH1;SOS1;PRKACB
Alzheimer disease-presenilin pathway_Homo sapiens_P00004	5/99	0.0766083	0.402194	0.215075	0.740734	-0.456839	1.17364	NOTCH2;FZD3;WNT2B;LRP1;CDH1
Dopamine receptor mediated signaling pathway_Homo sapiens_P05912	3/52	0.115688	0.438402	0.239636	0.740734	-0.224609	0.484449	GNAZ;MAOA;PRKACB
Huntington disease_Homo sapiens_P00029	1/124	0.943597	0.943597	0.982419	0.982419	4.31913	-0.250753	JUN
TGF-beta signaling pathway_Homo sapiens_P00052	4/88	0.142331	0.460845	0.315263	0.740734	0.321362	-0.626528	JUN;BMPR2;SMAD6;GDF7
p53 pathway_Homo sapiens_P00059	1/71	0.806811	0.819824	0.89942	0.913927	4.68069	-1.00478	IGFBP3
Nicotinic acetylcholine receptor signaling pathway_Homo sapiens_P00044	1/68	0.792888	0.819824	0.889137	0.913927	4.37083	-1.01435	MYH10
Cytoskeletal regulation by Rho GTPase_Homo sapiens_P00016	1/70	0.802277	0.819824	0.896101	0.913927	4.89298	-1.07793	MYH10
Interleukin signaling pathway_Homo sapiens_P00036	3/86	0.313722	0.656785	0.524437	0.884176	1.1857	-1.37453	RPS6KA6;RPS6KA2;SOS1
FGF signaling pathway_Homo sapiens_P00021	3/99	0.394861	0.656785	0.618997	0.884176	1.54271	-1.43352	PRKCH;MAP3K6;SOS1
Alzheimer disease-amyloid secretase pathway_Homo sapiens_P00003	1/56	0.726444	0.775695	0.836601	0.89332	4.6329	-1.48064	PRKCH
Metabotropic glutamate receptor group III pathway_Homo sapiens_P00039	1/54	0.713464	0.77497	0.825728	0.89332	4.42894	-1.49531	PRKACB
VEGF signaling pathway_Homo sapiens_P00056	1/54	0.713464	0.77497	0.825728	0.89332	4.6687	-1.57626	PRKCH
Heterotrimeric G-protein signaling pathway-Gq alpha and Go alpha mediated pathway_Homo sapiens_P00027	3/106	0.437601	0.656785	0.66452	0.884176	1.9592	-1.61918	PRKCH;GNG2;ITPR2
Heterotrimeric G-protein signaling pathway-Gi alpha and Gs alpha mediated pathway_Homo sapiens_P00026	3/127	0.557555	0.702519	0.777492	0.890582	2.87328	-1.67855	GNG2;ARRB1;PRKACB
EGF receptor signaling pathway_Homo sapiens_P00018	3/109	0.455574	0.656785	0.68282	0.884176	2.15355	-1.69311	PRKCH;SOS1;EGFR
5HT2 type receptor mediated signaling pathway_Homo sapiens_P04374	1/46	0.655102	0.75039	0.774643	0.890582	4.09679	-1.7328	PRKCH
Apoptosis signaling pathway_Homo sapiens_P00006	3/102	0.4133	0.656785	0.638988	0.884176	1.98055	-1.74997	JUN;PRKCH;IGF2R
T cell activation_Homo sapiens_P00053	2/73	0.499572	0.656785	0.682639	0.884176	2.76775	-1.92082	JUN;SOS1
Toll receptor signaling pathway_Homo sapiens_P00054	1/49	0.678262	0.763045	0.795329	0.89332	4.98725	-1.93616	JUN
77-1 vs control
Panther_2016	http://amp,pharm,mssm,edu/Enrichr/export?userListId=17280826&filename=temp_out&backgroundType=Panther_2016
Wnt signaling pathway_Homo sapiens_P00057	18/278	0.00825294	0.466812	0.0326949	0.925779	-1.77882	8.53335	SMAD1;PCDH7;FZD6;PCDH19;PCDH18;CELSR2;NKD1;PPP3CA;BCL9;GNG2;APC;CDH1;MYC;CDH11;EP300;DCHS1;FAT3;PLCB1
Cadherin signaling pathway_Homo sapiens_P00012	10/150	0.0355957	0.534731	0.0897759	0.925779	-1.32319	4.41355	FER;CDH1;PCDH7;CDH11;FZD6;DCHS1;FAT3;PCDH19;PCDH18;CELSR2
Integrin signalling pathway_Homo sapiens_P00034	10/156	0.0445609	0.534731	0.108328	0.925779	-1.30349	4.05504	LAMA5;COL14A1;COL5A2;ITGA8;COL4A6;COL4A5;PTK2B;PARVA;PIK3C2B;RHOB
Axon guidance mediated by semaphorins_Homo sapiens_P00007	3/17	0.0194505	0.466812	0.0405879	0.925779	-0.94123	3.70833	DPYSL4;SEMA3A;PLXNA1
CCKR signaling map ST_Homo sapiens_P06959	10/165	0.0606895	0.624234	0.140046	0.925779	-1.23302	3.45491	PPP3CA;GNG2;CCKBR;CDH1;MYC;ODC1;PTK2B;PLCB1;PRKACB;TPCN2
Notch signaling pathway_Homo sapiens_P00045	4/38	0.0412219	0.534731	0.0787343	0.925779	-0.835833	2.66529	NOTCH2;HEY1;POFUT1;PSEN2
Serine glycine biosynthesis_Homo sapiens_P02776	2/6	0.0163002	0.466812	0.0362474	0.925779	-0.46736	1.92392	PSAT1;PSPH
Endothelin signaling pathway_Homo sapiens_P00019	5/75	0.117442	0.767819	0.20013	0.925779	-0.839603	1.79827	GUCY1A3;EDNRA;PLCB1;PRKACB;PIK3C2B
Alzheimer disease-presenilin pathway_Homo sapiens_P00004	6/99	0.12797	0.767819	0.22435	0.925779	-0.456839	0.939242	NOTCH2;MMP16;LRP1;CDH1;FZD6;PSEN2
Insulin/IGF pathway-mitogen activated protein kinase kinase/MAP kinase cascade_Homo sapiens_P00032	3/29	0.0772438	0.695194	0.126873	0.925779	-0.32824	0.840552	RPS6KA2;IRS4;IGF2R
Insulin/IGF pathway-protein kinase B signaling cascade_Homo sapiens_P00033	3/34	0.11177	0.767819	0.173595	0.925779	-0.326125	0.71464	IRS4;IGF2R;PIK3C2B
TGF-beta signaling pathway_Homo sapiens_P00052	5/88	0.188279	0.805279	0.296846	0.925779	-0.180567	0.301516	SMAD1;BMP2;CITED2;BAMBI;EP300
Ras Pathway_Homo sapiens_P04393	4/69	0.215392	0.805279	0.31833	0.925779	0.0863904	-0.132635	RPS6KA2;RGL1;MAP3K4;RHOB
Parkinson disease_Homo sapiens_P00049	1/81	0.942378	0.942378	0.964347	0.964347	5.72497	-0.33977	CUL1
T cell activation_Homo sapiens_P00053	1/73	0.923576	0.936585	0.950347	0.963732	5.34696	-0.425092	PPP3CA
Alpha adrenergic receptor signaling pathway_Homo sapiens_P00002	2/23	0.187881	0.805279	0.255392	0.925779	0.511317	-0.854894	PLCB1;ADRA1A
Alzheimer disease-amyloid secretase pathway_Homo sapiens_P00003	1/56	0.86079	0.885384	0.900063	0.925779	5.80673	-0.870454	PSEN2
Heterotrimeric G-protein signaling pathway-Gi alpha and Gs alpha mediated pathway_Homo sapiens_P00026	3/127	0.819304	0.885384	0.894319	0.925779	4.37099	-0.87114	GNG2;ADORA1;PRKACB
Toll receptor signaling pathway_Homo sapiens_P00054	3/49	0.239337	0.805279	0.33209	0.925779	0.616359	-0.881322	IRAK4;IKBKE;TLR3
Metabotropic glutamate receptor group III pathway_Homo sapiens_P00039	1/54	0.850619	0.885384	0.891533	0.925779	5.63267	-0.911312	PRKACB
Dopamine receptor mediated signaling pathway_Homo sapiens_P05912	1/52	0.839706	0.885384	0.882284	0.925779	5.28759	-0.923759	PRKACB
VEGF signaling pathway_Homo sapiens_P00056	1/54	0.850619	0.885384	0.891533	0.925779	5.91588	-0.957134	PIK3C2B
Huntington disease_Homo sapiens_P00029	3/124	0.8066	0.885384	0.884815	0.925779	4.51173	-0.969694	CASP8;EP300;DYNLL1
Interleukin signaling pathway_Homo sapiens_P00036	2/86	0.802409	0.885384	0.868348	0.925779	4.46415	-0.982727	MYC;RPS6KA2
Angiogenesis_Homo sapiens_P00005	6/142	0.367175	0.885384	0.526098	0.925779	1.02312	-1.02508	NOTCH2;EFNB1;APC;PDGFC;PIK3C2B;RHOB
5HT2 type receptor mediated signaling pathway_Homo sapiens_P04374	1/46	0.801955	0.885384	0.849605	0.925779	4.96309	-1.09537	PLCB1
PDGF signaling pathway_Homo sapiens_P00047	3/112	0.748097	0.885384	0.838962	0.925779	3.88329	-1.12702	MYC;RPS6KA2;RERG
EGF receptor signaling pathway_Homo sapiens_P00018	3/109	0.731431	0.885384	0.825325	0.925779	3.62392	-1.13339	NRG2;MAP3K4;PIK3C2B
Inflammation mediated by chemokine and cytokine signaling pathway_Homo sapiens_P00031	6/188	0.635144	0.885384	0.785784	0.925779	2.59143	-1.17626	GNG2;COL14A1;CXCR4;PTK2B;PLCB1;PRKACB
Heterotrimeric G-protein signaling pathway-Gq alpha and Go alpha mediated pathway_Homo sapiens_P00027	3/106	0.713911	0.885384	0.810734	0.925779	3.49116	-1.17651	GNG2;ADORA1;PLCB1
80-1 vs control
Panther_2016	http://amp,pharm,mssm,edu/Enrichr/export?userListId=17280842&filename=temp_out&backgroundType=Panther_2016
De novo pyrimidine ribonucleotides biosythesis_Homo sapiens_P02740	3/9	0.000600932	0.0426662	0.00369074	0.262043	-1.03816	7.70005	CPS1;CTPS2;NME4
CCKR signaling map ST_Homo sapiens_P06959	8/165	0.0176873	0.313949	0.0992975	0.735386	-1.52205	6.14132	PPP3CA;JUN;GNG2;CCND1;MYC;CTNNB1;PLCB1;PRKACB
Wnt signaling pathway_Homo sapiens_P00057	11/278	0.0239997	0.315771	0.16438	0.735386	-1.39383	5.19858	PPP3CA;SMAD1;CDH4;GNG2;CCND1;MYC;ITPR2;CTNNB1;PLCB1;PCDH19;CELSR2
B cell activation_Homo sapiens_P00010	4/57	0.0266849	0.315771	0.0853831	0.735386	-1.1478	4.15923	PPP3CA;JUN;SYK;ITPR2
Endothelin signaling pathway_Homo sapiens_P00019	4/75	0.0624588	0.384173	0.171803	0.735386	-0.940037	2.60696	EDNRA;ITPR2;PLCB1;PRKACB
Inflammation mediated by chemokine and cytokine signaling pathway_Homo sapiens_P00031	7/188	0.0824681	0.384173	0.290011	0.735386	-0.621814	1.55164	JUN;GNG2;COL14A1;CXCR4;ITPR2;PLCB1;PRKACB
Integrin signalling pathway_Homo sapiens_P00034	6/156	0.0919455	0.384173	0.287788	0.735386	-0.539326	1.28713	COL5A1;ITGA4;COL14A1;ITGA8;COL4A5;PARVA
5-Hydroxytryptamine degredation_Homo sapiens_P04372	2/5	0.0037962	0.132995	0.0144161	0.446888	-0.159556	0.889328	MAOA;ALDH1A2
Serine glycine biosynthesis_Homo sapiens_P02776	2/6	0.0056195	0.132995	0.0188826	0.446888	-0.0111276	0.0576578	PSAT1;PHGDH
Glycolysis_Homo sapiens_P00024	2/17	0.0441176	0.384173	0.0950524	0.735386	0.117444	-0.366531	PFKL;PGK1
TGF-beta signaling pathway_Homo sapiens_P00052	4/88	0.0986022	0.384173	0.247631	0.735386	0.220976	-0.511928	SMAD1;BMP2;JUN;INHBA
Metabotropic glutamate receptor group I pathway_Homo sapiens_P00041	2/23	0.0759601	0.384173	0.150362	0.735386	0.281951	-0.726742	GRIK5;PRKACB
Apoptosis signaling pathway_Homo sapiens_P00006	1/102	0.871973	0.871973	0.948167	0.948167	5.4545	-0.747248	JUN
Angiogenesis_Homo sapiens_P00005	2/142	0.777425	0.788531	0.917484	0.930591	4.95533	-1.2476	JUN;CTNNB1
Hypoxia response via HIF activation_Homo sapiens_P00030	2/24	0.0818102	0.384173	0.160128	0.735386	0.513698	-1.28597	EGLN1;EGLN3
Oxidative stress response_Homo sapiens_P00046	2/24	0.0818102	0.384173	0.160128	0.735386	0.551053	-1.37948	JUN;MYC
p53 pathway_Homo sapiens_P00059	1/71	0.760614	0.78266	0.871644	0.896909	5.39359	-1.47585	HMGB1
PDGF signaling pathway_Homo sapiens_P00047	4/112	0.184341	0.467435	0.400402	0.78097	0.926366	-1.56646	JUN;MYC;RPS6KA2;ITPR2
Heterotrimeric G-protein signaling pathway-Gi alpha and Gs alpha mediated pathway_Homo sapiens_P00026	4/127	0.2469	0.531208	0.494925	0.78097	1.28196	-1.79318	GYS1;GNG2;PRKACB;GTF2H5
Huntington disease_Homo sapiens_P00029	4/124	0.234002	0.531208	0.476407	0.78097	1.23746	-1.79731	DYNC2H1;JUN;GRIK5;DYNLL1
DNA replication_Homo sapiens_P00017	2/19	0.0540539	0.384173	0.112755	0.735386	0.655602	-1.9129	POLA1;TOP2B
Interleukin signaling pathway_Homo sapiens_P00036	3/86	0.24483	0.531208	0.449803	0.78097	1.37855	-1.93989	MYC;RPS6KA2;IL13RA1
Cadherin signaling pathway_Homo sapiens_P00012	4/150	0.349335	0.595723	0.626636	0.78097	1.99694	-2.10023	CDH4;CTNNB1;PCDH19;CELSR2
Histamine H1 receptor mediated signaling pathway_Homo sapiens_P04385	2/26	0.0939029	0.384173	0.179995	0.735386	0.925535	-2.18935	ITPR2;PLCB1
Alzheimer disease-amyloid secretase pathway_Homo sapiens_P00003	1/56	0.676062	0.705889	0.801946	0.837326	5.59331	-2.18961	APH1B
Heterotrimeric G-protein signaling pathway-Gq alpha and Go alpha mediated pathway_Homo sapiens_P00027	3/106	0.35326	0.595723	0.588588	0.78097	2.1507	-2.23791	GNG2;ITPR2;PLCB1
Dopamine receptor mediated signaling pathway_Homo sapiens_P05912	2/52	0.277165	0.54549	0.443913	0.78097	1.82896	-2.34681	MAOA;PRKACB
T cell activation_Homo sapiens_P00053	2/73	0.428037	0.595723	0.622184	0.78097	2.96615	-2.51691	PPP3CA;JUN
Ras Pathway_Homo sapiens_P04393	2/69	0.400361	0.595723	0.591795	0.78097	2.88386	-2.63986	JUN;RPS6KA2
Alzheimer disease-presenilin pathway_Homo sapiens_P00004	2/99	0.589173	0.639784	0.779093	0.825606	5.01635	-2.65382	APH1B;CTNNB1

## Sheet: TRANSFAC_and_JASPAR_PWMs 
	Overlap	P-value	Adjusted_P-value	Old_P-value	Old_Adjusted_P-value	Z-score	Combined_Score	Gene_List
74-4 vs control
TRANSFAC_and_JASPAR_PWMs	http://amp,pharm,mssm,edu/Enrichr/export?userListId=17280594&filename=temp_out&backgroundType=TRANSFAC_and_JASPAR_PWMs
NFAT2 (human)	67/1376	4.16488e-05	0.00755401	2.8164e-11	1.34718e-09	-1.73792	17.5291	SPAG16;C11ORF74;GBE1;SLC8A1;TMEM47;TMEM100;FAM134B;CASP8;ZFP30;FBXO3;NEK1;ZNF765;PGM1;NUDT12;ZNF680;OXSM;ZBTB38;TRPC1;COMMD10;LANCL1;DARS2;THOC2;ANK3;MID1;WDR35;FOXP2;C12ORF4;RNF128;TMEM218;KCNQ5;UPRT;ZNF711;FJX1;CHODL;CALCB;FAM114A2;RGS16;STC1;HSD17B12;NCALD;MIPOL1;TMEM165;PRRG4;TCEAL8;TCEAL7;KDELC2;TSPAN6;STK38L;DTD1;ZNF620;DNAJC19;CRBN;GK;VDR;FZD6;TYSND1;BTBD11;PTPN13;MPP6;POLA1;CENPF;TTC8;TTC…
POU2F2 (human)	117/2792	5.26412e-05	0.00755401	8.09063e-15	2.32201e-12	-1.64098	16.167	C11ORF74;SPON1;GMFB;ZNF292;WDR89;TMEM141;MANEA;TATDN3;FAM134B;GJA1;ALCAM;MYC;DPYSL3;FBXO4;FBXO3;NEK1;ARFIP1;ZNF688;PRKACB;DDX18;EPHA7;ZNF680;UBE2E1;C8ORF4;ANK2;ANK3;SYTL5;TC2N;MID1;FOXP2;LZTFL1;EID1;TMX4;RNF128;FDX1;FAR2;KCTD12;SRSF7;STC1;LIN7A;SDSL;PGK1;EIF4EBP2;PMAIP1;RDH14;FADD;CGA;TBC1D8B;BTBD11;ARHGAP28;MAGOHB;PBX1;WDR54;DERA;VANGL1;CPS1;DLG3;COL5A2;CALM1;NIT2;CNTNAP2;GBE1;NXT2;RERG;CASP8;MR…
PGR (human)	66/1447	0.000312164	0.0298637	5.43515e-10	2.22841e-08	-1.71836	13.8706	SPAG16;CETN3;BRCA2;SLC8A1;TMEM47;CASP8;FPGT;DPYSL3;ARL6IP5;PGM2;FBXO3;PLS3;HADH;IFT57;HMGN3;SH3D19;ZBTB38;COMMD10;UBE2E1;C8ORF4;UNC5C;ANK2;ANK3;SYTL5;FAM126A;PJA1;SUB1;TMSB15B;FDX1;TMEM218;UPRT;KCTD12;CXORF57;OBSL1;ERGIC2;SRSF8;ASTN1;CCDC90B;CHODL;HDAC2;NDUFB3;NRXN3;SLC38A10;MIPOL1;SULT1A1;TCEAL8;OGFRL1;LDHA;FUT8;ZNF708;MAT2A;CHN2;EIF4EBP2;C7ORF25;ZNF32;SORBS2;ARHGAP28;CENPF;TTC8;CPS1;DLG3;COL5A2…
BCL6 (human)	61/1399	0.00159121	0.0969333	1.29162e-08	4.11882e-07	-1.65981	10.6946	GMFB;POGLUT1;FASTKD2;GBE1;CETN3;CPOX;ZNF43;MANEA;AMOT;TATDN3;DACH1;ZFP30;FPGT;SEC61G;RPS6KA2;SLC16A9;ZNF765;IFT57;LBR;PRKACB;HMGN3;PDK1;EPHA7;LANCL1;LRRIQ1;SLC39A10;SYTL5;MID1;FAM173B;TMX1;HMBS;FDX1;FIBIN;FAR2;ITGB3BP;NRXN3;STC1;PCDH19;ADH5;FUT8;CHTF8;CREG1;DPH3;MGAT2;CGA;DTD1;TBC1D8B;CCDC138;GK;ZNF181;SORBS2;BTBD11;ARPC5;DERA;CENPE;EHD3;CLCN4;CPS1;GSTA4;COL5A2;NUP35
CBEPB (human)	102/2598	0.00168873	0.0969333	2.68431e-11	1.34718e-09	-1.59493	10.1817	C11ORF74;PI4K2B;MANEA;SLC8A1;FAM134B;CDH4;GJA1;ZNF85;NEK1;NEK3;SLC16A9;PRKACB;HMGN3;ZNF320;EPHA7;OXSM;UBE2E1;ATG10;ANK3;SYTL5;MID1;FOXP2;LZTFL1;EID1;TMX4;PPA2;SUB1;HMBS;KCNQ5;KCTD12;KIF20B;SRSF7;ASTN1;FAIM;GYPC;SCFD2;TSPAN6;STK38L;CGA;SMAD1;CCDC18;CCDC138;STAC;VDR;CPSF2;TYSND1;BTBD11;ARHGAP28;FERMT1;CPS1;TMEM98;ZNF43;SYNE1;TMEM100;TUBA1A;MECOM;MFSD1;LBR;PGM1;SH3D19;ITGA4;H2AFZ;ELMOD2;LANCL1;LRRIQ…
CRTC3 (human)	45/1008	0.00420234	0.182648	6.36746e-07	9.61822e-06	-1.75199	9.58706	CHODL;C11ORF74;PI4K2B;SPON1;RGS16;CETN3;MGST1;PLOD2;HSD17B12;OMA1;HMMR;APOLD1;TCEAL7;NT5DC1;TUBA1A;IFI16;PPP4R4;PLS3;RDH14;LBR;TMEM14B;GPM6B;TBC1D8B;JAGN1;ANXA1;SIVA1;AGL;LRRIQ1;VRK1;MID1;MARCKS;IFT88;CPS1;CDKN2AIPNL;NEMF;IFT81;TMSB15A;RPS29;RPA3;COL5A2;ARMC4;PIGK;AGGF1;KBTBD8;LRP11
PRDM1 (human)	61/1468	0.00469425	0.182648	6.73988e-08	1.77452e-06	-1.6615	8.90799	GBE1;WDR3;NGLY1;SLC8A1;EDNRA;HEY1;SCRN3;ARL6IP5;FBXO3;NEK1;ARFIP1;HMGN3;KRT222;ZNF320;PCYT1B;SYK;DYNLT3;ATG10;CTPS2;SYTL5;PTBP2;TMBIM4;FAM173B;NDUFS5;HMBS;KCTD12;FJX1;ASTN1;PAOX;CHODL;TRUB1;GYPC;NRXN3;HMMR;SLAIN1;ZNF708;ALDH1B1;ADAMTS18;DPH3;MGAT2;TIMM8B;C21ORF33;FUS;AGL;SRD5A3;BTBD11;MINA;ACADSB;LSM3;PFKL;TTC8;KITLG;STAG2;CPS1;DLG3;TMEM98;RPS29;RPA3;MSRB2;RBM45;MNAT1
HNF4A (human)	83/2127	0.00551506	0.182648	3.5292e-09	1.2661e-07	-1.61415	8.39401	C11ORF74;PI4K2B;POGLUT1;GBE1;PLOD2;FZD10;SYNE1;RPS6KA6;CASP8;DACH1;ZFP30;ZNF845;PRKACB;PGM1;PDK1;ZNF320;DDX18;EPHA7;ZNF681;ZNF680;NCOA5;LMO2;C8ORF4;ANK2;ANK3;FOS;TC2N;MID1;WDR35;PJA1;KIAA1217;C12ORF4;ADORA2B;EHHADH;IGDCC3;HMBS;ARMC4;LANCL2;TMEM218;KCTD12;PLCB1;PDZRN3;CCDC90B;CHODL;SAMD9;GTF3C6;RGS16;CCDC103;NDUFB2;CXCR4;STC1;NDUFB1;NPL;HSD17B12;OMA1;SDSL;BPHL;TMEM165;ZNF708;UCP2;HEATR3;PLAC1;FADD…
ATF2 (human)	62/1517	0.00624692	0.182648	9.15769e-08	2.18206e-06	-1.63442	8.29579	GBE1;NGLY1;DBI;PLOD2;CHRDL1;DACH1;TUBA1A;CYP4V2;ACADM;PRKACB;SH3D19;PRMT6;SLC2A13;COMMD10;C8ORF4;CTPS2;ANK2;ANK3;FOS;SYTL5;MID1;PJA1;KIAA1217;C12ORF4;FAM173B;IFT81;TMEM218;SRSF3;ERGIC2;GTF3C6;NDUFB2;CXCR4;HOXD13;LIN7A;HSD17B12;PCDH19;NCALD;MIPOL1;RNFT1;MAN1C1;RDH14;FADD;DNAJC19;TIMM8B;NOP58;SLC16A1;TXNRD3;FUS;VDR;NAP1L3;HMGA2;LSM5;AIG1;PUS7L;CENPE;PM20D2;TTC8;CPS1;DLG3;RPA3;TTC30A;GOPC
MYB (human)	58/1409	0.00700045	0.182648	1.96712e-07	3.76376e-06	-1.63251	8.10018	GBE1;WDR3;ZNF292;HMGB1;CHRDL1;SYNE1;FAM134B;MRPL1;PLS3;IFT57;PRKACB;TMEM14B;NUDT12;DDX18;SLC30A9;ELMOD2;COMMD10;LANCL1;LRRIQ1;UBE2E1;ANK2;ANK3;SYTL5;FOXP2;EID1;TMX4;TMX1;EHHADH;SLC25A12;SRSF8;ASTN1;CCDC90B;MGST1;NRXN3;LIN7A;ESD;EGLN1;ZNF583;CCDC18;CRBN;VDR;AGL;FZD6;SORBS2;ARHGAP28;KLHL4;SULF1;ACADSB;PBX1;DHFR;FERMT1;CPS1;TTC30B;DLG3;COL5A2;CAPZA2;GOPC;MNAT1
TCF4 (human)	150/4210	0.00660688	0.182648	2.29891e-13	2.19929e-11	-1.40407	7.04793	C11ORF74;DCLRE1A;SPON1;CD83;POGLUT1;IFIT5;PLOD2;FZD10;TSEN2;TMEM141;SLC8A1;SOX2;EDNRA;ZFP30;FAM162A;FPGT;MYC;DPYSL3;FBXO4;FBXO3;HADH;PRKACB;HMGN3;NUDT12;ZNF320;EPHA7;ALG6;LMO2;C8ORF4;DNTTIP2;ANK2;ANK3;TC2N;MID1;FOXP2;THOC7;KIAA1217;EID1;TWSG1;SUB1;FAR2;SRSF8;ASTN1;FECH;FAM114A2;MGST1;HMMR;SLAIN1;PCDH19;KRCC1;NALCN;NDRG1;FUT8;ADAMTS18;TSPAN6;NAE1;GPM6B;CCDC18;DENND4A;STAC;FZD6;HMGA2;ZNF32;PHKB;ACA…
GATA6 (human)	57/1447	0.0171319	0.409739	9.74644e-07	1.36951e-05	-1.58733	6.45537	GMFB;NGLY1;HMGB1;GPHN;SLC8A1;CASP8;TUBA1A;NEK1;ARFIP1;EMB;ZNF765;HMGN3;PDK1;SH3D19;KRT222;PCYT1B;LRRIQ1;FAAH2;ATP11C;ANK2;THNSL1;MID1;WDR35;NSMCE4A;RNF128;FDX1;ZNF711;KCTD12;ST6GALNAC3;OBSL1;ASTN1;FAM114A2;CUL1;MGST1;SLAIN1;NCALD;FUT8;CGA;GPM6B;NIPSNAP3A;API5;FUS;SRD5A3;NAP1L3;SORBS2;ARHGAP28;ARPC5;MINA;FERMT1;CENPE;CENPF;TTC30B;DLG3;ZNF616;COL5A2;UBA3;PNPLA4
POU1F1 (human)	55/1408	0.0219633	0.419997	1.95186e-06	2.17514e-05	-1.57962	6.03159	ZNF43;GPHN;SLC8A1;SYNE1;GJA1;MRPL1;MECOM;PLS3;PRKACB;HMGN3;SH3D19;DDX18;DBNL;COMMD10;LRRIQ1;ANK2;ANK3;MID1;FOXP2;PJA1;PSMA3;FIBIN;PIGK;SRSF8;HDAC2;GTF3C6;FAM114A2;MGST1;ASB13;NCALD;IFI16;ZNF107;CGA;EGLN1;NIPSNAP3A;AGL;GALNT1;FZD6;NAP1L3;TYSND1;SORBS2;KLHL4;PTPN13;COQ5;ETAA1;PM20D2;CPS1;APC;RPS29;NDUFAF4;RPA3;MSRB2;NUP35;CDO1;MBTPS2
STAT5B (human)	54/1379	0.0221456	0.419997	2.26973e-06	2.41264e-05	-1.57656	6.00689	C11ORF74;MOCS3;CD83;NGLY1;DBI;TTF2;FZD10;NXT2;GJA1;ALCAM;ZFP30;SCRN3;SEC61G;SLC16A9;NUDT12;LRRIQ1;UBE2E1;C8ORF4;CTPS2;ATP11C;SYTL5;MID1;WDR35;KIAA1217;TMX1;PSMA2;PIGK;SRSF7;CCDC90B;CHODL;TRUB1;GTF3C6;FAM114A2;RGS16;GLRX;FUT8;GPM6B;TBC1D8B;NIPSNAP3A;STAC;ZNF181;NAP1L3;PHKB;BTBD11;HPS6;VANGL1;CENPE;POLA1;EHD3;TTC30B;RPS29;ID2;AGGF1;CDO1
HNF1A (human)	70/1855	0.0212078	0.419997	2.38569e-07	4.02761e-06	-1.55839	6.00507	C11ORF74;WDR3;CPOX;CHRDL1;RERG;SYNE1;MRPL3;EDNRA;FPGT;FBXO3;ARFIP1;ACADM;SLC30A9;PCYT1B;NCOA5;DYNLT3;UBE2E1;SETMAR;CTPS2;THOC2;THNSL1;MID1;THOC7;PPA2;PIGK;FAR2;KCTD12;ST6GALNAC3;ASTN1;TMEM45A;MYCBP;GYPC;NRXN3;GLRX;HMMR;NALCN;ADH5;MIPOL1;TMEM165;EFNB1;ZNF708;ALDH1B1;IFI16;TSPAN6;ESD;PGK1;HEATR3;PLAC1;NAE1;CGA;CCDC18;TTC12;API5;MMAB;AGK;FZD6;SORBS2;PHKB;KLHL4;MINA;MAGOHB;COQ5;KITLG;TTC30B;DLG3;CDKN…
REPIN1 (human)	56/1466	0.0304675	0.514363	2.99751e-06	2.86762e-05	-1.56101	5.44962	PI4K2B;DCLRE1A;ZNF492;FASTKD2;TTF2;RND2;TMEM141;SYNE1;ALCAM;DPYSL4;BMPER;RPS6KA2;DPYSL3;NEK1;ZNF688;HADH;IFT57;PCYT1B;SYK;ELMOD2;SORCS1;DYNLL1;EML5;NSMCE4A;ARMC4;PFDN4;OBSL1;FJX1;PRTFDC1;PAOX;CCDC103;SDC3;CTR9;NDUFB1;HOXD13;JAKMIP1;NCALD;PRRG4;LDHA;DPH3;MAN1C1;SLIT2;TAF9B;GPM6B;DARS;SMAD1;CCDC18;MMAB;STAC;PHKB;CENPE;STAG2;RPS29;ID2;CALM1;SNTB1
RBPJ (human)	58/1535	0.0335435	0.534832	2.72427e-06	2.69609e-05	-1.56112	5.29988	PREP;NXT2;TMEM141;MANEA;CHRDL1;SLC8A1;FAM134B;RPS6KA6;TUBA1A;AP1S2;NEK1;SYK;KIAA1143;DARS2;ANK3;FOS;SYTL5;MID1;KAT2B;PSMA3;NSMCE4A;PSMA2;FDX1;LANCL2;TMEM218;COL4A5;UPRT;ERGIC2;ATPAF1;TMEM45A;TRUB1;MYCBP;RGS16;CTR9;LIN7A;NPL;TMEM165;AMZ2;NAE1;SMAD1;ZNF583;VDR;AGL;TYSND1;ZNF32;SULF1;LSM5;PUS7L;VANGL1;POLA1;BMP2;TTC8;APC;RPS29;UBA3;CNTN1;CPVL;SNTB1
STAT1 (human)	62/1667	0.0375003	0.566451	1.97051e-06	2.17514e-05	-1.4914	4.89688	STEAP3;YEATS4;HMGB1;AMOT;TATDN3;SOX2;MRPL1;DPYSL4;PPP4R4;CYP4V2;ARL6IP5;ARFIP1;ZNF765;IFT57;PDK1;EPHA7;ALG8;NOG;UBE2E1;LRRC40;DNTTIP2;SORCS1;SYTL5;KAT2B;C12ORF4;IFT88;NDUFS5;SUB1;HMBS;FDX1;LANCL2;KCTD12;ST6GALNAC3;BLVRA;CEBPA;SAMD9;SDC3;MGST1;CXCR4;STC1;LIN7A;JAKMIP1;BPHL;APOLD1;NCALD;RNFT1;FUT8;TSPAN6;RBBP7;DNAJC19;C21ORF33;MMAB;ZNF181;NAP1L3;PBX1;CLCN4;CPS1;TTC30B;POLE2;TTC30A;MSRB2;KBTBD8
LEF1 (human)	159/4658	0.0234145	0.419997	1.02152e-12	7.32939e-11	-1.29984	4.88012	C11ORF74;PI4K2B;DCLRE1A;STEAP3;ZNF292;IRS4;IFIT5;CPOX;GPATCH4;YEATS4;TTF2;FZD10;TMEM141;SLC8A1;AMOT;SOX2;FAM134B;CDH4;RPS6KA6;GJA1;DACH1;ZFP30;FAM162A;DPYSL3;ZNF85;ARL6IP5;ZNF845;NEK3;HADH;PRKACB;HMGN3;ZNF287;EPHA7;ZNF680;ALG6;LMO2;SETMAR;ATP11C;THOC2;ANK3;SYTL5;TC2N;MID1;FOXP2;THOC7;KIAA1217;EID1;RNF128;FDX1;ZNF711;PEX11G;SRSF8;CHODL;GYPC;DCUN1D1;MGST1;LIN7A;SDSL;PCDH19;ADH5;TMTC4;SULT1A1;FUT8;S…
SMAD3 (mouse)	5/72	0.0624125	0.688938	0.016577	0.0557526	-1.62805	4.51619	TCEAL7;CISD1;FIBIN;NAE1;BICC1
NFATC3 (human)	7/116	0.0573381	0.658242	0.00993425	0.0380151	-1.56943	4.48667	RAB36;DDX1;UBE2E1;MFSD1;SRSF3;GOPC;NCALD
NR5A1 (human)	52/1389	0.0489137	0.640693	1.17686e-05	9.93412e-05	-1.48235	4.47327	XYLT1;GPATCH4;TMEM141;SLC8A1;SYNE1;EMILIN3;NEK3;PGM1;PDK1;ZNF320;FAAH2;VRK1;PTGR1;PEX7;RNF128;FAM173B;IFT81;TMSB15A;TMEM218;ERGIC2;HPGD;DDX1;NRXN3;GLRX;HSD17B12;NCALD;KIAA0040;SULT1A1;FUT8;KDELC2;DPH3;ALX4;CGA;ZSWIM5;TIMM8B;SMAD1;MARCKSL1;SIVA1;GK;TYSND1;SORBS2;CNOT10;ARHGAP28;MINA;FERMT1;TTC8;NDUFAF4;PNPLA4;GOPC;SSBP1;ACTR10;LRP11
NFYA (human)	90/2549	0.0433116	0.621521	6.80129e-08	1.77452e-06	-1.42095	4.46085	SPAG16;PYCRL;ZNF492;FASTKD3;LRR1;CETN3;IRS4;HMGB1;WDR89;NXT2;KIF15;ARV1;TUBA1A;MECOM;SEC61G;ZNF85;ARL6IP5;MFSD1;NEK1;ACADM;EMB;HADH;HMGN3;NUDT12;DDX18;ZNF681;ANXA1;ZNF680;SYK;DYNLT3;LMO2;ATG10;DARS2;DNTTIP2;ANK2;IRAK4;WDR35;EML5;SFPQ;PSMA3;TMX1;PIGK;TMEM218;COL4A5;UPRT;FAR2;TCTA;ASTN1;HOMEZ;HDAC2;CCDC103;NRXN3;LIN7A;HMMR;HIGD1A;NDRG1;NCALD;TMEM165;OGFRL1;ZNF708;ALDH1B1;CREG1;DPH3;PGK1;RBBP9;RDH14…
ZBTB16 (human)	58/1572	0.0491124	0.640693	5.46628e-06	5.06072e-05	-1.47719	4.45172	SPAG16;NGLY1;SLC2A1;CHRDL1;RERG;CASP8;GLIPR2;ARFIP1;IFT57;PGM1;SH3D19;DDX18;DYNLT3;SLC2A13;COMMD10;ATP11C;PEX1;ANK3;PTGR1;TC2N;MID1;WDR35;PEX7;TMX1;FDX1;FAR2;ST6GALNAC3;FJX1;SRSF8;ASTN1;SAMD9;RGS16;GLRX;CENPB;TMEM165;MAT2A;CHN2;TSPAN6;HLTF;FADD;MGAT2;ZSWIM5;SLC25A24;TBC1D8B;JUN;EGLN3;SORBS2;ARHGAP28;DERA;CENPE;CENPF;KITLG;STAG2;DLG3;RPA3;CSPG5;GOPC;ACTR10
IRF8 (human)	57/1550	0.0534188	0.658242	7.2717e-06	6.52181e-05	-1.45651	4.26699	CNTNAP2;MOCS3;POGLUT1;WDR3;CISD1;WDR89;NXT2;SLC8A1;GJA1;DACH1;MECOM;EMB;ZNF688;HMGN2;PGM1;PDK1;ZNF287;DBNL;SYK;LMO2;C8ORF4;THNSL1;MID1;FOXP2;IFT88;FAM173B;ARMC4;LANCL2;CXORF57;ASTN1;CHODL;CCDC103;SLC38A10;PCDH19;MIPOL1;TMEM165;TMTC4;SULT1A1;LDHA;ALDH1B1;C6ORF203;EGR1;VDR;MINA;LSM5;MPP6;PBX1;FLI1;DCBLD2;DHFR;VANGL1;BMP2;ID2;ZNF616;PNPLA4;CDO1;MBTPS2
TBP (human)	87/2486	0.055435	0.658242	1.70525e-07	3.49576e-06	-1.3095	3.78779	FASTKD2;FASTKD3;CETN3;ZNF43;GPATCH4;PLOD2;HMGB1;NXT2;GPHN;SLC8A1;TMEM100;CASP8;FPGT;NEK1;PLS3;PRKACB;HMGN3;PGM1;SH3D19;EPHA7;SLC30A9;ANXA1;SYK;ITGA4;NCOA5;LRRIQ1;UBE2E1;SLC39A10;ZDHHC13;ANK2;TC2N;MID1;EML1;FOXP2;LZTFL1;IFT88;RNF128;RAB36;FIBIN;ZNF711;CXORF57;PFDN4;ST6GALNAC3;KIF20B;SRSF8;ATPAF1;CTR9;CXCR4;SLC38A10;STC1;HOXD13;NPL;HMMR;SLAIN1;NDRG1;NCALD;MIPOL1;TCEAL7;NT5DC1;BRIP1;FUT8;KLRG2;HEATR…
POU2F1 (human)	51/1399	0.0733247	0.779414	2.81546e-05	0.000218388	-1.40691	3.67606	CNTNAP2;FASTKD3;NGLY1;ZNF43;NXT2;MANEA;ALCAM;GLIPR2;DPYSL3;FBXO4;KRT222;DDX18;PCYT1B;DBNL;ZNF680;SYK;UBE2E1;FAAH2;ANK2;DYNLL1;SYTL5;MID1;PTBP2;NEMF;SUB1;PADI2;FAR2;KCTD12;SRSF7;CCDC90B;DDX1;LIN7A;NCALD;FGD5;FUT8;PGK1;ALX4;ZNF107;CGA;ZNF620;EGLN3;GALNT1;SORBS2;BTBD11;ETAA1;PM20D2;CENPF;CPS1;DLG3;ID2;MSRB2
JUND (human)	50/1380	0.081901	0.839485	3.93034e-05	0.000296844	-1.42229	3.55891	PI4K2B;FASTKD2;NGLY1;NXT2;GJA1;CASP8;AP1S2;SH3D19;NCOA5;ANKRD46;DYNLT1;PEX1;ANK3;MID1;FOXP2;KIAA1217;PSMA3;IFT88;IFT81;FAR2;KIF20B;FJX1;ERGIC2;SRSF8;TMEM45A;GYPC;MGST1;NRXN3;LIN7A;GLRX;SLAIN1;SDSL;TMTC4;TCEAL8;IFI16;ESD;RDH14;ZNF620;CRBN;AGL;SRD5A3;SORBS2;ARHGAP28;SULF1;TTC30B;APC;SNX14;ID2;GOPC;BEX5
EIF4EBP1 (human)	10/212	0.100642	0.931751	0.0113625	0.0418083	-1.54028	3.53676	EID1;ZNF681;DBNL;MRPS33;ASB13;ANK2;NEK3;PCDH19;MBTPS2;MPHOSPH6
Nr2e3 (mouse)	7/139	0.119825	1	0.0233868	0.0721722	-1.56647	3.3236	CENPE;EFNB1;MARCKSL1;TMSB15A;GBE1;NDUFAF4;AGGF1
75-2 vs control
TRANSFAC_and_JASPAR_PWMs	http://amp,pharm,mssm,edu/Enrichr/export?userListId=17280677&filename=temp_out&backgroundType=TRANSFAC_and_JASPAR_PWMs
REPIN1 (human)	53/1466	0.000610544	0.174005	8.56177e-09	4.52716e-07	-1.76643	13.0736	KCNC1;SYNE1;ALCAM;RPS6KA2;ZIC1;NEK1;MAP3K6;CCDC92;HGSNAT;SCARA3;SYK;NUP210;HEG1;SORCS1;NAV2;MYO7A;PRSS12;ANK1;RNF144A;TMEM37;EML5;GPR161;EHBP1L1;OBSL1;LRP1;SDC3;PRUNE2;HOXD13;LTBP2;HOXB13;NID2;NCALD;CACNA1G;FOXRED2;RNF213;ALOX5;PRDM16;ZNF703;STXBP5;SLIT2;PCDH9;PLXDC2;SMAD6;PARP14;SNCAIP;ABHD15;HIPK2;GDF7;MYO1D;LRFN5;FRAS1;FAT1;SNTB1
PGR (human)	51/1447	0.00134997	0.18252	3.69002e-08	1.19174e-06	-1.73119	11.4391	RAB3B;WNT2B;DOCK3;DDX60L;BRCA2;SLC8A1;MFSD6;SIPA1L1;SVEP1;SH3D19;ZBTB38;UNC5C;ANK2;FRMD4B;NAV2;ATP11A;ANK3;IL17RD;ANK1;SYTL4;ARMCX2;CCDC80;TNMD;SCN8A;KCTD12;ZNF780A;OBSL1;ZNF594;AARS2;ADAM22;LPL;DDX60;LTBP1;FUT4;OGFRL1;FUT8;CHN2;PLAGL1;ZNF704;TP53INP1;MAP7;EIF4EBP2;PCK1;SYT2;SORBS2;ARHGAP28;DLG3;SMOC1;COL5A2;CD24;ATG2B
SMAD4 (mouse)	54/1580	0.00192126	0.18252	3.7634e-08	1.19174e-06	-1.65686	10.3633	DOCK3;PODXL2;MAST4;MAST2;COL12A1;CELSR1;CELSR2;HOXA13;ZCCHC14;MFSD6;CDH4;MAN1A2;SIX2;PTGFRN;CCDC92;ZHX3;CACNA2D1;ELOVL2;SLC2A13;KREMEN1;VPS13A;ANK1;CDYL2;SCN8A;ADAM12;SOS1;PDZRN3;NOTCH2;H6PD;PAPLN;PRICKLE2;HOXD13;SEL1L3;CHN2;PRDM16;PLXNA1;MGAT2;ATP9A;SPEN;JUN;FZD3;WSCD1;SORT1;LRBA;CDC42BPA;SNAP91;HIPK2;GDF7;GPR137C;SDK1;PM20D2;MYO5B;LZTR1;LRP11
TEAD2 (human)	50/1486	0.00384334	0.21907	2.00234e-07	5.18789e-06	-1.69103	9.40453	STEAP3;MAST4;FHL1;ZCCHC14;MFSD6;ZNF608;MAN1A2;PHYHD1;PLEKHG4;GUCY1A2;SCARA3;MAGI3;ARHGEF17;ELOVL2;NAV2;ATP11A;CYS1;ANO5;COL2A1;GPR161;CHDH;SCN8A;PXDN;COL4A5;TRIB2;FAM84B;MACF1;IGSF3;PCDH10;ADAM22;GREB1L;APCDD1;EGFR;KIAA0040;CACNA1G;RNF213;KDELC2;MARVELD1;ALOX5;PLAGL1;SLITRK3;TP53INP1;SLITRK5;TNRC18;JUN;LRBA;NIN;ZNF618;HOOK1;NOVA2
SP1 (mouse)	74/2360	0.00288595	0.205624	2.89057e-09	2.74604e-07	-1.60123	9.36384	CPM;BMPR2;WNT2B;MAST2;FHL1;GXYLT1;ARRB1;CELSR1;HOXA13;ZCCHC14;SOX2;CDH4;SIPA1L1;MAN1A2;SIX2;NEK1;PHACTR2;PTGFRN;ERC1;RNF150;SCN5A;CCDC92;POLE;GEN1;IGFBP5;MAGI3;CACNA2D1;ARHGEF17;HEG1;KREMEN1;ATP11A;PRSS12;ANK1;POU3F3;CDYL2;EML5;SCN8A;GNAZ;TTYH3;IGSF3;STX17;LRP1;PCDH10;PAPLN;ZBTB42;HOXD13;CD99L2;SEL1L3;OGFRL1;PRDM16;PLXNA1;MGAT2;ATP9A;E2F7;SPEN;LRBA;ERLIN2;SYNJ2;CDC42BPA;PTPN13;SMAD6;SNAP91;BICC1;…
TCFAP2A (human)	46/1367	0.00548935	0.260744	6.40908e-07	1.40507e-05	-1.70016	8.84925	GNAZ;KCNC1;SDC3;FHL1;GREB1L;SLC35F1;LTBP2;SLAIN1;GALNT10;CENPB;ZCCHC14;CACNA1G;HS6ST3;CDH4;RNF213;PRDM16;WWC3;STXBP5;SLIT2;CCDC92;POLE;PLEKHG4;WSCD1;PCDH9;ARHGEF17;C21ORF58;SORCS1;ATP11A;SMAD6;ANK1;CDYL2;IGF2R;ABHD15;HIPK2;DKK3;GSTZ1;SDK1;ZNF618;GPR161;NOVA2;SCN8A;EHBP1L1;FAT1;MEGF8;SOS1;MET
EGR1 (human)	26/681	0.00774211	0.315214	2.6396e-05	0.000259409	-1.75879	8.54964	MACF1;H6PD;STX17;FHL1;GREB1L;LTBP2;EGFR;KDELC2;ALOX5;WWC3;PTGFRN;PCK1;CCDC92;ATP7A;POLE;ZNF480;FN1;CDC42BPA;AIG1;HIPK2;SDK1;GPR161;DOK6;PXDN;EHBP1L1;DCHS1
UBTF (human)	48/1493	0.0104203	0.371224	1.25182e-06	2.54834e-05	-1.66646	7.60574	ALG1L;CNTNAP2;MOXD1;STEAP3;MAST4;SETD7;FHL1;LAMA3;ITPR2;LTBP2;PCDH19;PCDH18;EGFR;SLC8A1;SYNE1;HS6ST3;SOX2;PLAGL1;RPS6KA2;TP53INP1;SLIT2;SCN5A;MYH10;SLC25A24;JUN;LRBA;ITGA2;LGI2;FN1;NAV2;AIG1;PUS7L;ANK1;GDF7;TTLL7;PTPRD;FRAS1;DLG3;TMEM98;DAAM1;TBC1D5;SMOC1;SCN8A;SLCO2A1;GOPC;HPRT1;NPTXR;TRIB2
SMAD3 (mouse)	5/72	0.0244265	0.464104	0.00590484	0.0225454	-1.89596	7.03798	GPX3;PCDH20;FIBIN;BICC1;CACNA1G
SP3 (human)	43/1332	0.0140428	0.389482	4.22593e-06	6.69106e-05	-1.64727	7.02667	FAM49A;MACF1;GNAZ;TTYH3;KCNC1;MAOA;SDC3;FHL1;ZBTB42;AK7;KIAA0040;ZCCHC14;AMOT;CACNA1G;CDH4;RNF213;LDOC1L;ALOX5;RPS6KA2;WWC3;CYP1B1;CCDC92;SLC16A2;PLEKHG4;ZNF480;ARHGEF17;SLC35C1;C21ORF58;KREMEN1;SMAD6;AIG1;ANK1;ABHD15;DKK3;GSTZ1;SDK1;ZNF618;CTDSP1;HOOK1;GPR161;SCN8A;EHBP1L1;MEGF8
ETS2 (human)	43/1341	0.0155895	0.389482	4.97119e-06	6.74662e-05	-1.56847	6.52666	ALG1L;MACF1;STEAP3;CSRNP3;FHL1;ENDOD1;SLC35F1;PCDH18;SYNE1;SOX2;NYNRIN;ADAMTS5;ALCAM;ZNF608;ZNF629;MARVELD1;CHN2;SIX2;PHACTR2;PTGFRN;SLC16A9;TNS1;TBC1D8B;SLC30A9;SYK;ERAP2;PCDH20;FN1;HPS6;NAV2;ERLIN2;ANK3;PARP14;AR;LRFN5;MAF;NBEA;HOOK1;GPR161;KCNQ5;DCHS1;ZNF358;APOBEC3B
SP3 (mouse)	37/1129	0.0177659	0.389482	1.48975e-05	0.000165992	-1.59804	6.44086	GNAZ;SLFN5;IGSF3;LRP1;PCDH10;ADAM22;PRICKLE2;LPL;FUT4;NCALD;SYNE1;CACNA1G;GPR173;RIMS4;DACH1;ADAMTS18;TNRC18;MGAT2;CCDC92;TBC1D8B;PDGFRA;NEK9;SLC30A9;SLC2A10;LRBA;ANK3;SYNJ2;SULF1;CDC42BPA;PTPN13;PARP14;TTLL7;SDK1;DLG3;TMEM98;PADI2;MET
EGR1 (mouse)	50/1617	0.0176764	0.389482	2.16885e-06	3.86326e-05	-1.5662	6.32043	BMPR2;PODXL2;FHL1;ARRB1;ZCCHC14;CDH4;SIPA1L1;MAN1A2;SIX2;ENPP1;ERC1;SCN5A;CCDC92;GEN1;PDGFRA;MAGI3;CACNA2D1;ELOVL2;HEG1;SLC2A12;KREMEN1;MTUS2;CDYL2;RNF144A;EML5;TBC1D5;TNMD;SCN8A;KCTD12;CENPB;FOXRED2;IGFBPL1;PRDM16;PLXNA1;SLIT2;ATP9A;ARNT2;SORT1;LRBA;HMGA2;DDHD1;CDC42BPA;IGF2R;ABHD15;HIPK2;GPR137C;SDK1;NIN;DLG3;TMEM229B
E2F1 (human)	116/4207	0.0135573	0.389482	6.81681e-11	9.71395e-09	-1.46636	6.30655	STEAP3;IRS4;GALNT10;HS6ST3;DPYSL5;WWC3;NEK1;ENPP1;TRIM25;CYP1B1;CCDC92;GEN1;GUCY1A2;SCARA3;MAGI3;SLC35C1;C21ORF58;FRMD4B;ANK3;VASH1;ANK1;SYTL4;DKK3;KIAA1217;DOK6;EHBP1L1;KCTD12;NPTXR;OBSL1;NOTCH2;HOMEZ;MACF1;ADCYAP1R1;TTYH3;PCDH10;SDC3;ENDOD1;SLAIN1;PCDH19;APCDD1;AK7;KIAA0040;CACNA1G;FUT8;RNF213;MAP2;KIAA1644;PRDM16;MAP7;TNRC18;KIF3C;MYH10;TBC1D8B;SYT2;APOBEC3G;LRBA;CPSF2;HMGA2;HPS6;SYNJ2;SMAD6;A…
MZF1 (human)	43/1389	0.0263447	0.469264	1.14563e-05	0.000148411	-1.54401	5.61477	CNTNAP2;STEAP3;WNT2B;SETD7;FHL1;ZBTB42;SYNE1;NYNRIN;GPR173;ZNF608;DPYSL5;ADAMTS18;RPS6KA2;SIX2;ZNF703;MAP7;WWC3;MAL2;ZNF503;PRAME;PLEKHG4;JUN;GSN;SYT2;GPR37;PLEKHG2;PRKCH;SLC2A10;NAV2;MYO7A;SPTB;ABHD15;DKK3;PTPRD;COL1A1;TTC9;CDK6;TBC1D5;OAS3;DCHS1;KCTD12;CD24;OBSL1
HINFP (human)	86/3047	0.0203469	0.414205	1.50949e-08	6.14577e-07	-1.44024	5.60949	CNTNAP2;SPON1;SLC35B4;PODXL2;KCNC1;FHL1;GXYLT1;OLFML2A;SLC8A1;EFEMP1;DACH1;ZIC1;WWC3;PHACTR2;CYP1B1;PTGFRN;RNF150;CCDC92;SLC16A2;SH3D19;GEN1;PLEKHG4;IGFBP5;NUP210;GPX3;ZNF480;CACNA2D1;ARHGEF17;C21ORF58;MTUS2;ANK3;IL17RD;DKK3;AR;CCDC80;RNF128;TBC1D5;SCN8A;EHBP1L1;FIBIN;DSG2;NPTXR;FREM2;MACF1;ADCYAP1R1;H6PD;TTYH3;AARS2;IGSF3;STX17;TSHZ2;LAMA3;PRUNE2;FAM129A;STC1;CD99L2;CENPB;SEL1L3;RNF213;ALOX5;ZNF…
PURA (human)	18/492	0.0346829	0.549146	0.000729396	0.00424241	-1.66268	5.58911	MAST4;PCDH20;LGI2;COL12A1;PRICKLE2;ITPR2;NAV2;PCDH19;SORL1;SPTB;SULF2;AMOT;RNF213;CHN2;MYO5B;RIN3;STXBP5;AMOTL1
MIR133B (human)	45/1500	0.0369567	0.554351	1.51432e-05	0.000165992	-1.52329	5.02381	RAB3B;STEAP3;PARM1;IGSF3;MAST4;SDC3;FHL1;CD99L2;KCNA6;SLAIN1;PCDH19;AK7;NID2;CENPB;SYNE1;NYNRIN;LCN12;NEK1;SLC16A9;ADAMTS9;PLEKHG4;GSN;PRKCH;SYK;APOBEC3G;MAGI3;KREMEN1;TYSND1;ARHGAP28;ATP11A;ERLIN2;ANK3;PUS7L;SULF2;TTLL7;MYO1D;COL2A1;DAAM1;SMOC1;CNTN1;PADI2;CSPG5;KCTD12;HPRT1;TMEM229B
SRF (human)	94/3420	0.0288992	0.484486	9.53086e-09	4.52716e-07	-1.39982	4.96088	RAB3B;ALG1L;STEAP3;CSRNP3;WNT2B;PODXL2;MEGF10;COL12A1;FHL1;GXYLT1;ARRB1;SLC35F1;TMEM100;NYNRIN;EFEMP1;TUBA1A;SESN3;RPS6KA2;PHACTR2;TRIM25;C22ORF46;EMB;ADAMTS9;TNS1;SLC30A9;SYK;CACNA2D1;ELOVL2;SLC2A13;MTUS2;SYTL4;ASPM;EML5;ARMCX2;CCKBR;TBC1D5;CD109;PADI2;COL4A5;RIN3;IRF6;FREM2;FAM84B;DSC3;NOTCH2;HOMEZ;PARM1;PCDH10;PRUNE2;HOXD13;LIN7A;LTBP2;PLD1;HOXB13;LTBP1;THSD4;FUT4;NCALD;CACNA1G;MARVELD1;MAP2;L…
NFATC3 (human)	6/116	0.0502397	0.622536	0.0100657	0.0349846	-1.60445	4.79883	GSTZ1;ARNT2;MOXD1;FN1;GOPC;NCALD
SP1 (human)	42/1406	0.0454148	0.616343	3.25576e-05	0.00029932	-1.50856	4.66435	FAM49A;MACF1;GNAZ;TTYH3;KCNC1;MAOA;FHL1;SLAIN1;AK7;ZCCHC14;AMOT;CACNA1G;RNF213;MARVELD1;ALOX5;RPS6KA2;PRDM16;WWC3;CYP1B1;CCDC92;POLE;JUN;ZNF480;ARHGEF17;SLC35C1;C21ORF58;KREMEN1;SMAD6;AIG1;ANK1;IGF2R;ABHD15;DKK3;GSTZ1;SDK1;ZNF618;CTDSP1;GPR161;NOVA2;SCN8A;EHBP1L1;MEGF8
BCL6 (human)	42/1399	0.0425304	0.606057	2.91359e-05	0.000276791	-1.45669	4.59957	CPM;CSRNP3;STX17;FAM114A1;PCDH10;FHL1;STC1;PCDH19;PCDH18;AMOT;HS6ST3;NYNRIN;FUT8;DACH1;RPS6KA2;RNF217;MAP7;PHACTR2;SLC25A43;SLC16A9;MGAT2;PRKACB;TBC1D8B;EPHA7;CDKN2B;PRKCH;GPX3;ITGA2;FN1;CARD6;SORBS2;NAV2;HIPK2;PTPRD;EHD3;CLCN4;ZNF618;SCN8A;DOK6;COL5A2;FIBIN;FAT3
TEAD4 (human)	40/1354	0.0574177	0.67845	6.38491e-05	0.000551424	-1.43108	4.08916	FAM49A;MACF1;ADCYAP1R1;STX17;KCNC1;MAOA;STC1;SLAIN1;KIAA0040;CACNA1G;SOX2;GPR173;ALOX5;ZNF703;SLITRK5;ENPP1;SCN5A;CCDC92;SAMD12;PLEKHG4;JUN;GPR37;ZNF480;FN1;AIG1;ANK1;CDYL2;HIPK2;DKK3;TTC9;ZNF618;HOOK1;GPR161;NOVA2;SCN8A;PXDN;EHBP1L1;DCHS1;MEGF8;LRP11
WT1 (human)	74/2689	0.0498466	0.622536	4.98383e-07	1.18366e-05	-1.349	4.04539	CNTNAP2;BMPR2;DOCK3;PODXL2;KCNC1;FHL1;ARRB1;SLC35F1;ZCCHC14;HS6ST3;MFSD6;CDH4;RPS6KA6;LDOC1L;PHYHD1;WWC3;CCDC92;SCARA3;SLC2A10;ZNF480;ELOVL2;C21ORF58;KREMEN1;SORCS1;ATP11A;ANK1;SPTB;CDYL2;DKK3;MMP11;GPR161;SCN8A;DOK6;EHBP1L1;GNAZ;ADCYAP1R1;H6PD;TTYH3;SDC3;PAPLN;ITPR2;ZBTB42;SLAIN1;SEL1L3;CACNA1G;RNF213;ALOX5;PLAGL1;PRDM16;SLITRK5;ZNF503;TNRC18;PRAME;STXBP5;SLIT2;JUN;SYT2;LRBA;CPSF2;LSAMP;SYNJ2;CD…
E2F6 (human)	40/1358	0.0595132	0.67845	6.791e-05	0.000569246	-1.41313	3.98721	SLFN5;STEAP3;WNT2B;H6PD;PCDH10;FHL1;ENDOD1;ITPR2;SLAIN1;CELSR2;NID2;GALNT10;ZCCHC14;CACNA1G;OGFRL1;RPS6KA6;KDELC2;LCN12;SIX2;TRIM25;SCN5A;CCDC92;POLE;GEN1;PLEKHG4;JUN;SYT2;SLC35C1;KREMEN1;NAV2;ERLIN2;CYS1;SNCAIP;ANK1;CDYL2;HIPK2;TMEM37;TBC1D5;CSPG5;MEGF8
MIR210 (human)	4/70	0.076163	0.774005	0.0247461	0.0734649	-1.5479	3.98565	TTC9;WSCD1;MAP2;CD109
CBX5 (human)	3/40	0.0628797	0.687344	0.0261505	0.0760499	-1.41205	3.90649	PCDH9;PRICKLE2;GREB1L
TEAD2 (mouse)	45/1591	0.0802212	0.774005	5.97132e-05	0.000531821	-1.37855	3.47805	FAM49A;BMPR2;PARM1;IGSF3;FAM114A1;LRP1;PCDH10;FHL1;IRS4;ITPR2;ZBTB42;CELSR1;NCALD;SYNE1;CACNA1G;ADAMTS15;GPR173;RIMS4;TUBA1A;PRDM16;ZIC1;TRIM25;TNRC18;EMB;CCDC92;PDGFRA;JUN;HMGA2;ANK2;ARHGAP28;SMAD6;DKK3;DCBLD2;VANGL1;MOV10;AR;TTC9;CDK6;CTDSP1;NOVA2;COL4A5;DCHS1;IRF6;MEGF8;OBSL1
TBP (human)	68/2486	0.0651168	0.687344	1.94068e-06	3.6873e-05	-1.27097	3.47175	ALG1L;CSRNP3;MAST4;MEGF10;IFT172;FHL1;TNC;DDX60L;PRSS23;SLC8A1;HS6ST3;TMEM100;NYNRIN;GPR173;PCLO;NEK1;PHACTR2;ENPP1;SAMD12;PRKACB;SH3D19;EPHA7;SLC30A9;SYK;MAGI3;ELOVL2;ITGA2;SLC2A12;VPS13A;MTUS2;ANK2;NAV2;RNF144A;ASPM;ZNF91;RNF128;DAAM1;CD109;FIBIN;IRF6;STX17;FAM114A1;KIAA1324L;TSHZ2;STC1;HOXD13;LTBP2;SLAIN1;PCDH18;NCALD;FUT8;IGFBPL1;PLAGL1;EIF4EBP2;ZNF107;TRIM45;SLC25A24;PCDH20;FN1;LSAMP;SORBS2;…
PCBP1 (human)	39/1360	0.0846365	0.77811	0.000143859	0.00117142	-1.37886	3.40495	MACF1;GNAZ;TTYH3;KCNC1;MAOA;AK7;GALNT10;ZCCHC14;AMOT;CACNA1G;CDH4;RNF213;KDELC2;ALOX5;RPS6KA2;PRDM16;WWC3;CYP1B1;SLIT2;CCDC92;JUN;ZNF480;ARHGEF17;SLC35C1;C21ORF58;KREMEN1;AIG1;ANK1;ABHD15;DKK3;GSTZ1;SDK1;ZNF618;CTDSP1;GPR161;SCN8A;EHBP1L1;CSPG5;MEGF8
77-1 vs control
TRANSFAC_and_JASPAR_PWMs	http://amp,pharm,mssm,edu/Enrichr/export?userListId=17280826&filename=temp_out&backgroundType=TRANSFAC_and_JASPAR_PWMs
POU2F2 (human)	123/2792	0.00235783	0.34778	5.71468e-12	4.21458e-10	-1.64098	9.92797	SPON1;TP53RK;ZNF292;TNC;DIXDC1;LCLAT1;GALNT10;FGF5;SCAMP5;FAM134B;EFEMP1;RASSF5;MYC;DAG1;GRB10;FBXO4;CCDC97;NEK1;ARFIP1;SVEP1;PRKACB;TRIM21;MAP3K4;SOX5;SLC25A46;GEN1;DDX18;SP110;LMO3;TMOD2;ANK2;FRMD4B;ANK3;ESCO2;FOXP2;TMX4;RRAGA;RNF128;PSME3;SCN8A;KCTD12;TTPAL;FKBP5;ZNF398;YTHDC2;MRPL17;TEX261;SLC1A4;SDSL;DTX4;SEL1L3;ESPNL;TMEM127;FIGNL1;PMVK;EIF4EBP2;RDH14;FADD;DECR1;AMMECR1;MAD2L1BP;ARHGAP28;MA…
LEF1 (human)	193/4658	0.00224994	0.34778	1.56816e-16	4.62607e-14	-1.49541	9.11727	TP53RK;POP1;ZAK;ZNF292;GPATCH4;IKZF2;ALKBH3;SOX2;FAM134B;RASSF5;ZC3H12B;NIPAL2;CCDC97;KIF21B;CHAC1;PRKACB;TNS3;SOX5;ZNF19;ANK3;INPP4A;CCDC80;RNF128;TRIM14;SLC35D1;SDSL;PCDH19;APCDD1;PCDH18;GRPEL1;SCFD2;MAP2;FIGNL1;PDGFC;ZNF703;RDH14;HMOX2;LRRN2;LRBA;FZD6;AMMECR1;RAB27B;MAGOHB;ACADSB;PARP12;VANGL1;FERMT1;FAM111A;TMEM98;NDUFAF4;HOXD4;FAT3;FBXL7;MOCS3;FASTKD2;TCF25;PHF23;PAK1IP1;SLC7A11;ZNF48;PCMTD2…
GATA6 (human)	68/1447	0.00593024	0.58314	5.86117e-08	2.16131e-06	-1.70017	8.71792	TP53RK;DUSP19;PPP1R9A;SLC8A1;ALKBH3;CASP8;NHSL1;ZC3H12B;ADORA1;NEK1;ARFIP1;ERC1;ZNF765;TRIM21;SH3D19;NCOA1;EDARADD;PCYT1B;MUM1L1;SHROOM3;ANK2;THNSL1;WDR35;DIEXF;RHOB;MINPP1;RNF128;SNPH;KCTD12;BCAT1;UMPS;OBSL1;ASTN1;CHST3;DDX28;YTHDC2;CUL1;PSEN2;DDX20;SEMA3E;SLAIN1;NCALD;DHX33;MAP2;RRS1;MBP;APBB2;PRAME;DECR1;FKTN;CA12;FUS;SRD5A3;AMMECR1;SORBS2;ARHGAP28;MINA;ABCA8;BTBD9;FERMT1;FAM111A;CENPF;DLG3;CO…
ZBTB7A (human)	64/1373	0.00889398	0.655931	1.95048e-07	6.39323e-06	-1.68975	7.97963	COL18A1;KCNC1;PYCRL;PHF23;IKZF1;HS6ST1;CELSR2;DPYSL4;POFUT1;WWC3;EP300;KIF21B;SCN5A;ZNF765;PRKACB;GUCY1A3;EDARADD;KLF10;SCARA3;HUNK;ANO5;ZFP41;MMP16;TFDP2;DNAJC30;SCN8A;CDC42EP1;TCTA;SCN4B;PAOX;LAMA5;CEBPA;DDX20;HTRA1;SLC38A10;SLC7A1;TRAK2;ZNRF3;PDGFC;ZNF703;ZNF746;ZKSCAN2;APBB2;SLIT2;PCNT;ZNF786;ZSWIM5;SLC19A1;HMOX2;ZNF189;ZNF783;SMAD1;EGR1;FUS;MOCOS;MAD2L1BP;HIPK2;VANGL1;BCKDK;CDK6;TBXAS1;AGRN;…
PGR (human)	66/1447	0.0124895	0.65822	2.61693e-07	7.28463e-06	-1.69271	7.41893	PHF23;NAT10;PKD2;BRCA2;HS6ST2;SLC8A1;MFSD6;CASP8;WDR92;RASSF5;GRB10;ZNF385B;SVEP1;SH3D19;SOX5;TSFM;LMO3;ZBTB38;MUM1L1;EPDR1;FRMD4A;UNC5C;ANK2;FRMD4B;ATP11A;ANK3;ESCO2;DIEXF;MINPP1;CCDC80;ZFP41;SCN8A;RFT1;TMEM218;ANKS6;KCTD12;BCAT1;UMPS;OBSL1;SRSF8;ASTN1;AARS2;SLC35D1;SLC38A10;ZNF518A;BRCC3;DTX4;LTBP1;FUT4;CLN6;ENOX2;MAT2A;FIGNL1;EIF4EBP2;NOP14;LYSMD2;SORBS2;ARHGAP28;RAB27B;FAM111A;CENPF;FER;CPS1;…
ELK1 (human)	68/1511	0.0149035	0.65822	2.7163e-07	7.28463e-06	-1.70083	7.15397	SLC23A2;ATP8A2;FASTKD2;PHF23;DOCK8;PFAS;ADRA1A;FARS2;ZCCHC14;MFSD6;KIAA1549;CASP8;PCLO;EFEMP1;MECOM;DPYSL4;RPS6KA2;ZNF689;MLYCD;TNS1;SOX5;MAGI1;GEN1;ZNF18;TMEM150A;MSX2;LMO3;IFT88;PIGM;TTLL11;ASPHD2;BCAT1;FREM2;PAOX;ZNF398;LRP1;ODC1;DDX20;HTRA1;SLAIN1;SAMHD1;PCDH19;HOXB13;NKD1;NCALD;PDZD2;KDELC2;NSD1;PDGFC;ADAMTS17;EIF4EBP2;APBB2;TRIM45;VDR;XRCC2;LYSMD2;MICAL2;MAD2L1BP;VANGL1;BCKDK;ZNF619;CPS1;GI…
ESR2 (mouse)	5/51	0.0308431	0.758227	0.00854847	0.0255057	-1.99126	6.92727	BMP2;RIMS4;DAG1;TCTA;SEL1L3
POU2F1 (human)	63/1399	0.0184987	0.65822	7.54874e-07	1.48459e-05	-1.64858	6.57794	CNTNAP2;TP53RK;FASTKD3;DUSP19;TNC;PPP1R9A;HS6ST2;PCMTD2;ALKBH3;NHSL1;RASSF5;PSD4;ADORA1;DAG1;FBXO4;CCDC97;ZNF385B;TRIM21;UTP14A;SOX5;NCOA1;GEN1;KLF10;DDX18;PCYT1B;DBNL;SYK;DTX3L;SP110;LMO3;TMOD2;ANK2;DYNLL1;RRAGA;KCTD12;FREM2;YTHDC2;MRPL17;NKD1;CLN6;NCALD;ESPNL;TMEM127;MAP2;ALX4;APOL1;ZNF620;LYSMD2;AMMECR1;SORBS2;ZFHX4;TPCN2;ETAA1;CENPF;DAB2;AMACR;CPS1;DLG3;ID2;TBXAS1;LYRM7;FAT3;RGL1
TEAD4 (human)	61/1354	0.0201106	0.65822	1.1283e-06	1.95794e-05	-1.62372	6.34306	COL18A1;CD83;ANKRD33B;KCNC1;CITED2;C2CD2;KCNC3;SOX2;LMBR1;HEY1;DPYSL4;EP300;SCN5A;SAMD12;SOX5;KLF10;PLEKHG4;ZNF480;PUS1;URB2;IRAK4;DYNLL1;HDHD3;ZFP41;RPUSD1;SCN8A;CDH11;GEMIN4;CDC42EP1;PLCB1;PAOX;CAMK2B;ADCYAP1R1;STX17;SLC35D1;TSHZ1;ODC1;CXCR4;SLC1A4;BRCC3;SLAIN1;JAKMIP1;KIAA0040;GLB1L2;CACNG8;C15ORF39;ZNRF3;CBS;PDGFC;ZNF703;APBB2;MINA;HIPK2;NELL1;ZNF618;ID2;TBXAS1;DCHS1;AGRN;MEGF8;LRP11
STAT3 (human)	115/2759	0.0173726	0.65822	8.12844e-10	3.99648e-08	-1.52479	6.17975	CD83;POGLUT1;TP53RK;DIXDC1;LCLAT1;SOX2;FGF5;EDNRA;EFEMP1;DACH1;RASSF5;ADORA1;FBXO4;SLC16A9;PSPH;GUCY1A3;GEN1;SLC30A9;LMO3;SLC35C1;UNC5C;ANK2;FRMD4B;ATP11A;ANK3;ESCO2;TMX4;ASPHD2;SRSF8;ASTN1;MRPL16;SLAIN1;PCDH19;HOXB13;LTBP1;SEL1L3;HLCS;MAP2;PMVK;ADAMTS17;HMOX2;ZNF783;FUS;VDR;RHBDD1;IRF2BP1;AMMECR1;MINA;BTBD9;SLC16A13;VANGL1;FAM111A;BMP2;EHD3;CDK6;AMACR;CPS1;HOXD4;MANSC1;DCHS1;RGL1;TMEM19;MRFAP1L1…
IRF8 (human)	68/1550	0.0245438	0.65822	6.52096e-07	1.37406e-05	-1.61036	5.97009	SLC23A2;CNTNAP2;MOCS3;ANKRD33B;POGLUT1;MEGF10;C2CD2;PHF23;SLC8A1;ZNF48;KIAA1549;DACH1;MECOM;RASSF5;PDE4B;GRB10;DBNL;TMEM150A;SEMA6A;SYK;MSX2;PUS1;THNSL1;FOXP2;MINPP1;IFT88;MMP16;FAM173B;CDH11;GAS6;ASTN1;DSC3;ZNF398;CCDC103;DDX20;SLC38A10;PCDH19;LTBP1;SEL1L3;EXOSC4;ALDH1B1;GRPEL1;NSD1;SUSD5;PCNT;FKTN;EGR1;VDR;PCDH7;UROS;ZNF804A;AMMECR1;MINA;ZFHX4;MPP6;PBX1;DCBLD2;VANGL1;FAM111A;BMP2;CDK6;KLHL5;ID2…
E2F1 (human)	167/4207	0.0235725	0.65822	1.50087e-12	1.47586e-10	-1.45318	5.44604	DCLRE1A;POP7;DIXDC1;IRS4;IKZF1;IKZF2;HS6ST1;GALNT10;HS6ST3;FGF5;DPYSL4;CLP1;ADORA1;WWC3;NEK1;TRIM25;EP300;KIF21B;SOX5;PSKH1;GEN1;SCARA3;SEMA6A;SP110;RALGAPA2;LMO3;IFRD2;SLC35C1;FRMD4B;ANK3;TMEM131;MINPP1;RRAGA;ZFP41;FAM173B;C9ORF69;COL4A6;GEMIN4;TCTA;KCTD12;TTPAL;OBSL1;NOTCH2;HOMEZ;ADCYAP1R1;MRPL16;ILDR2;MRPL17;SLC1A4;SLAIN1;PCDH19;APCDD1;DTX4;KIAA0040;RRP7A;CHTF8;RNF216;MAP2;FIGNL1;KIAA1644;CHST…
MYB (human)	61/1409	0.0401554	0.87821	3.81055e-06	5.91637e-05	-1.6069	5.16617	SLC23A2;TP53RK;POP1;ZAK;ZNF292;CHRDL1;ALKBH8;SYNE1;FAM134B;PCLO;EFEMP1;PDE4B;EPSTI1;ZNF385B;SAMD12;NCKAP5;PRKACB;SOX5;SLC25A46;NCOA1;DDX18;SLC30A9;MSX2;LMO3;SHROOM3;ANK2;ANK3;FOXP2;MINPP1;TMX4;SHQ1;TFDP2;POLR1B;PSME3;PIGM;IRF6;SRSF8;ASTN1;STX17;GRPEL1;MPZL3;ATP9B;E2F7;FKTN;VDR;FZD6;AMMECR1;SORBS2;ARHGAP28;ABCA8;ACADSB;PBX1;TMEM154;FANCF;FERMT1;FER;CPS1;DLG3;COL5A2;TBXAS1;TMEM19
PCBP1 (human)	59/1360	0.0416778	0.87821	5.21688e-06	7.32848e-05	-1.59482	5.068	COL18A1;ANKRD33B;KCNC1;CITED2;C2CD2;KCNC3;HS6ST1;GALNT10;ZNF48;FARS2;ZCCHC14;AMOT;LMBR1;KIAA1549;HEY1;DPYSL4;POFUT1;RPS6KA2;WWC3;EP300;EPC2;KLF10;ZNF480;PUS1;SLC35C1;URB2;HDHD3;TMEM131;ZFP41;C9ORF69;RPUSD1;SCN8A;CDH11;TCTA;TRIB1;SCN4B;PAOX;TSHZ1;ODC1;CXCR4;SLC1A4;BRCC3;NKD1;GLB1L2;FAM83H;ZNRF3;KDELC2;CBS;NSD1;PDGFC;SLIT2;SLC19A1;MOCOS;SDK1;ZNF618;TBXAS1;CSPG5;AGRN;MEGF8
PURA (human)	24/492	0.0575808	0.999196	0.000764065	0.00346768	-1.67538	4.7825	SAMD9;PON2;UROS;ZNF804A;G0S2;ESRRG;PCDH19;SORL1;AMOT;STAG1;MECOM;HEY1;DHX33;POFUT1;TMEM127;ID2;MYC;CDH11;COL4A6;EPC2;ZNF623;BCAT1;GAS6;CHMP6
EIF4EBP1 (human)	12/212	0.0648999	1	0.00516759	0.0171285	-1.7281	4.72621	DBNL;SLC35B4;SLITRK3;ADAT1;ASB13;ANK2;NEK3;IKZF2;PCDH19;ZFHX4;ZNF543;MBTPS2
THRB (human)	84/2034	0.0477318	0.938725	3.23546e-07	7.95384e-06	-1.52233	4.63117	SLC23A2;COL18A1;POP7;CD83;NAA40;FASTKD2;ZC3H4;CITED2;KCNC3;DOCK8;RASL11A;PPP1R9A;CELSR2;ALDH1L2;ZNF48;ZCCHC14;GHR;PPP3CA;KIAA1549;ZC3H12B;LAMP3;EMILIN3;DAG1;GRB10;SCN5A;UTP14A;PSKH1;C11ORF24;GEN1;KLF10;TSFM;ZNF18;TMEM150A;SLC2A10;MYO7A;ANO5;TMEM177;TMBIM4;ZFP41;DDIT4;PLCB1;SCN4B;PAOX;IGSF3;STX17;NOP2;DTX4;FUT4;TRAK2;SEL1L3;HIRA;FOXRED2;CACNG8;ALDH1B1;ZNF629;CBS;CHST10;ZNF623;LRRC8B;PCNT;ZNF786;AT…
PRDM1 (mouse)	11/196	0.0784772	1	0.0076828	0.0236086	-1.75911	4.47684	GALNT7;NOP14;PODXL2;RASSF5;ZC3H12B;MYC;CUL1;ADORA1;EPSTI1;MFSD1;TRIM21
MIR138 (human)	57/1356	0.0715901	1	1.81355e-05	0.000191071	-1.53659	4.05168	COL18A1;ANKRD33B;POP1;WDR4;PKD2;PRSS23;CHRDL1;ADRA1A;ZCCHC14;SYNE1;MECOM;PSD4;MCF2L;GRB10;SACS;EPC2;SCN5A;IKBKE;KLF10;PLEKHG4;PUS1;WDR73;ESCO2;MED29;ZFP41;OAS3;LAMA5;DNAH1;TSHZ1;ODC1;FAM129A;HOXD13;SLAIN1;SEL1L3;FAM83H;HIRA;CACNG8;EXOSC4;GNG2;GRPEL1;TMEM127;HLCS;KIAA1644;APBB2;FADD;NOP14;PCDH7;SORBS2;RAB27B;ERLIN2;BTBD9;SLC16A13;CYLD;STAG1;MANSC1;RGL1;FBXL7
TCF4 (human)	163/4210	0.054155	0.998482	2.16537e-11	1.27757e-09	-1.3258	3.86591	SLC23A2;DCLRE1A;SPON1;CD83;ATP8A2;POGLUT1;ZAK;TNC;IKZF1;TSEN2;SLC8A1;SOX2;FGF5;FAM198A;EDNRA;EFEMP1;POFUT1;CLP1;MYC;LAMP3;GRB10;SACS;FBXO4;TRIM25;SVEP1;SAMD12;NCKAP5;PRKACB;ZNF202;SOX5;PSKH1;SLC25A46;GEN1;SLC38A1;SCARA3;SP110;METTL1;LMO3;TMOD2;ANK2;SLC6A11;ATP11A;ANK3;FOXP2;MINPP1;SCN8A;COL4A6;TTLL11;GEMIN6;SRSF8;ASTN1;DSC3;TRANK1;MRPL16;SLC1A4;BRCC3;SLAIN1;PCDH19;APCDD1;DTX4;PCDH18;KRCC1;NALCN;Z…
TCFAP2A (human)	57/1367	0.0802034	1	2.25692e-05	0.000226284	-1.508	3.80497	COL18A1;ANKRD33B;KCNC1;C2CD2;IKZF1;IKZF2;HS6ST1;GALNT10;ZNF48;ZCCHC14;HS6ST3;HEY1;DPYSL4;POFUT1;FASTK;MFSD3;GRB10;WWC3;EP300;EPC2;SOX5;KLF10;PLEKHG4;TMEM150A;URB2;ATP11A;RPUSD1;SCN8A;CDH11;CDC42EP1;TCTA;PLCB1;CAMK2B;TGFBRAP1;HTRA1;ILDR2;SLAIN1;CENPB;CHTF8;ZNRF3;CBS;NSD1;ZNF746;SLIT2;ZNF786;SMAD1;EGR1;LYSMD2;FBXL14;IGF2R;HIPK2;SDK1;ZNF618;TBXAS1;AGRN;MEGF8;TNRC6A
SMAD3 (mouse)	5/72	0.103249	1	0.0301908	0.0690409	-1.60369	3.64137	GALNT7;COL18A1;FIBIN;BICC1;FANCF
SP1 (human)	58/1406	0.0906817	1	2.5577e-05	0.000235788	-1.47026	3.52922	SLC23A2;COL18A1;ANKRD33B;KCNC1;CITED2;C2CD2;KCNC3;HS6ST1;FARS2;ZCCHC14;AMOT;LMBR1;HEY1;DPYSL4;FASTK;RPS6KA2;WWC3;EP300;KIF21B;KLF10;ZNF480;PUS1;SLC35C1;URB2;HDHD3;SLC7A5;ZFP41;RPUSD1;SCN8A;CDH11;GAS6;SCN4B;PAOX;LAMA5;CEBPA;TSHZ1;ODC1;CXCR4;SLC1A4;BRCC3;SLAIN1;JAKMIP1;NKD1;GLB1L2;FAM83H;CACNG8;CHTF8;ZNRF3;CBS;NSD1;PDGFC;SLC19A1;IGF2R;SDK1;ZNF618;TBXAS1;AGRN;MEGF8
HNF4A (human)	85/2127	0.0852978	1	1.00147e-06	1.84646e-05	-1.43191	3.52481	SLC23A2;NAA40;POGLUT1;POP1;KCNC3;DOCK8;HS6ST1;SYNE1;PCMTD2;GHR;LMBR1;KIAA1549;CASP8;NHSL1;DACH1;ADORA1;PRKACB;SOX5;PSKH1;NKX3-1;EDARADD;DDX18;CR2;ZNF19;TMEM150A;NCOA5;MSX2;DTX3L;SP110;LMO3;ANK2;ATP11A;ANK3;WDR35;SLC7A5;MINPP1;C12ORF4;SOAT1;TFDP2;TMEM218;ANKS6;PIGM;GEMIN6;KCTD12;PLCB1;FKBP5;DDX28;SAMD9;CCDC103;CXCR4;NPL;SDAD1;SDSL;APCDD1;PCDH18;TRAK2;GLB1L2;FOXRED2;SNX29;SLITRK3;ZNF703;HEATR3;PTK2…
NR3C1 (human)	65/1590	0.0877909	1	1.06954e-05	0.000121352	-1.40229	3.41148	ANKRD33B;SH2D4A;ZNF292;DUSP19;GPATCH4;PKD2;HOXA13;LCLAT1;SLC8A1;FGF5;SCAMP5;FAM198A;KIAA1549;MCF2L;GRB10;MLYCD;SAMD12;IKBKE;NKX3-1;GUCY1A3;ZNF18;CR2;SLC30A9;PCYT1B;DBNL;TMEM150A;EVC;FAM173B;C9ORF69;RPUSD1;RFT1;GAS6;SCN4B;CHST3;FKBP5;SP100;SAMD9;PSEN2;NLRC5;ASB13;SEMA3E;SDSL;PCDH18;LTBP1;KIAA0040;EFNB1;RBM15B;EXOSC4;ALDH1B1;IFI16;HLCS;PTK2B;DECR1;NOP14;ZNF181;SLC16A13;BCKDK;CENPF;SNX19;XK;DLG3;AGG…
REPIN1 (human)	60/1466	0.0964566	1	2.3012e-05	0.000226284	-1.45829	3.41046	COL18A1;DCLRE1A;KCNC1;FASTKD2;PPP1R9A;ZNF48;SYNE1;DPYSL4;BMPER;POFUT1;CLP1;RPS6KA2;GRB10;NEK1;ZNF385B;PSPH;HGSNAT;PCYT1B;SCARA3;SEMA6A;SYK;PUS1;URB2;MYO7A;DYNLL1;IL17RA;ZFP41;RPUSD1;OBSL1;PAOX;ZNF473;LRP1;CCDC103;YTHDC2;ODC1;HOXD13;JAKMIP1;HOXB13;NCALD;RRP7A;FOXRED2;NSD1;PDGFC;ZNF703;PLAGL2;MBP;SLIT2;STOX1;SMAD1;G0S2;ESRRG;HIPK2;BAMBI;PSAT1;ID2;TBXAS1;MANSC1;IARS;RGL1;SNTB1
NKX2-8 (human)	13/256	0.107987	1	0.00855954	0.0255057	-1.52193	3.38742	TMEM150A;SRXN1;LMO3;EPDR1;GPATCH4;HPS6;STXBP5L;XK;DLG3;ACOX3;TNS3;SLC25A24;ZNF189
NFATC2 (human)	7/117	0.110832	1	0.0226362	0.0529974	-1.53642	3.37972	BCKDK;IPO9;TBXAS1;TMEM218;GPATCH4;TMCO4;NCKAP5
PRDM1 (human)	60/1468	0.0982731	1	2.39015e-05	0.00022745	-1.42131	3.29745	USP38;SH2D4A;PPP1R9A;HS6ST2;SLC8A1;ALKBH8;CTSO;EDNRA;HEY1;POFUT1;SCRN3;NEK1;ARFIP1;SOX5;PCYT1B;SYK;SP110;ATP11A;INPP4A;MINPP1;RRAGA;SHQ1;TMBIM4;FAM173B;GEMIN6;KCTD12;CHST4;ASTN1;PAOX;SP100;AARS2;KLHL14;ILDR2;TEX261;SLAIN1;PDZD2;ALDH1B1;CHST10;PDGFC;RRS1;MAL2;PCNT;E2F7;HMOX2;ZNF189;ERAP2;FUS;SRD5A3;ZNF804A;RAB27B;MINA;ACADSB;STXBP5L;NELL1;CPS1;KLHL5;DLG3;TMEM98;MANSC1;KLHDC9
SP3 (mouse)	47/1129	0.106462	1	0.000123879	0.000745804	-1.40763	3.15305	LAMA5;CEBPA;ATP8A2;IGSF3;LRP1;CITED2;KCNC3;PHF23;NPL;FUT4;NCALD;SYNE1;GHR;FAM83H;RIMS4;DACH1;MAT2A;NIPAL2;PMVK;CEP72;PTK2B;SLC19A1;HMOX2;EDARADD;SLC38A1;SLC30A9;SLC2A10;LRBA;PCDH7;ANK3;MINA;PTPN13;STXBP5L;SDK1;DAB2;EVC;MBLAC2;SOAT1;DLG3;TMEM98;NFE2L3;SFXN2;TNRC6A;FBXL7;ASTN1;PAOX;FKBP5
80-1 vs control
TRANSFAC_and_JASPAR_PWMs	http://amp,pharm,mssm,edu/Enrichr/export?userListId=17280842&filename=temp_out&backgroundType=TRANSFAC_and_JASPAR_PWMs
PGR (human)	44/1447	0.00330983	0.883725	4.21249e-07	2.39269e-05	-1.74402	9.95983	GABRB3;GPAA1;GLDC;NRXN3;SLC38A10;BRCC3;PKD2;LTBP1;CLN6;HS6ST2;SLC8A1;AFF2;SULT1A1;ENOX2;TCEAL8;OGFRL1;LDHA;FUT8;TCEAL4;RASSF5;ARL6IP5;EIF4EBP2;METTL7A;SH3D19;UNC5C;ANK2;SORBS2;ARHGAP28;ANK3;SYTL5;SYTL4;PJA1;TMLHE;CPS1;DLG3;SUB1;TMSB15B;MSRB2;KCTD12;CXORF57;ZMYND11;OBSL1;MBTPS2;SRSF8
POU2F1 (human)	41/1399	0.0083607	0.883725	2.63404e-06	6.80062e-05	-1.7249	8.2523	GABRB3;CNTNAP2;CELF2;ECI1;LIN7A;KLHL13;TRMT2B;NXT2;CXXC4;PHF6;CLN6;HS6ST2;TMEM164;FUT8;ESPNL;NHSL1;CCND1;RASSF5;PGK1;FBXO4;ALX4;UTP14A;EGLN3;DBNL;SYK;GALNT1;AMMECR1;ANK2;SORBS2;DYNLL1;SYTL5;ETAA1;PM20D2;CPS1;DLG3;CD109;SUB1;MSRB2;PADI2;FAR2;KCTD12
POU2F2 (human)	72/2792	0.0118112	0.883725	4.10674e-08	5.83157e-06	-1.62803	7.22636	GABRB3;CNTNAP2;SPON1;CELF2;ECI1;ZNF292;SLC7A11;NXT2;PHF6;GJA1;NHSL1;EFEMP1;TUBA1A;RASSF5;MYC;FBXO4;NEK1;ACADM;PRKACB;UTP14A;SH3D19;SYK;NCOA5;ANK2;ANK3;SYTL5;PJA1;EID1;TMX4;RNF128;CD109;FAR2;KCTD12;CXORF57;NUP62CL;NLRX1;KHDRBS3;FAM129A;ITPR2;STC1;LIN7A;KLHL13;TRMT2B;CXXC4;CENPB;TMEM164;ENOX2;ESPNL;CBS;MAN1C1;PGK1;EIF4EBP2;SLC25A24;TBC1D8B;EGLN3;AGL;GALNT1;AMMECR1;ARHGAP28;MAGOHB;AIG1;PBX1;WDR54;TM…
NFYA (human)	66/2549	0.0146526	0.883725	1.4812e-07	1.4022e-05	-1.62685	6.8704	GABRB3;PYCRL;CELF2;CETN2;CASC4;IRS4;HMGB3;HMGB1;NXT2;FAM127C;SLC4A4;NYNRIN;TUBA1A;PTER;SIX5;RASSF5;ARL6IP5;NEK1;ACADM;EMB;SLC37A4;SYK;ATG10;DARS2;ALG13;ANK2;WDR35;SFPQ;SUCLG2;COL4A5;FAR2;TCTA;ZMYND11;ARHGEF6;HOMEZ;LYPD1;FAM129A;NRXN3;LIN7A;KLHL13;HMMR;NDRG1;LTBP1;TMEM165;ENOX2;OGFRL1;ALDH1B1;PITRM1;S100A16;PGK1;RSU1;MGAT2;GPM6B;TTC12;AGL;GALNT1;SORBS2;PLXDC2;AIG1;PBX1;DCBLD2;ALDH4A1;STAG1;CPS1;DL…
ZBTB16 (human)	43/1572	0.0208849	0.883725	7.95208e-06	0.000173722	-1.69395	6.55344	GLDC;SLC2A1;ITPR2;BRCC3;SLC4A4;CENPB;TMEM164;TMEM165;AFF2;EFEMP1;TCEAL4;RASSF5;TSPAN6;MGAT2;SLC37A4;ZSWIM5;SH3D19;SLC25A24;TBC1D8B;JUN;EGLN3;ATP11C;SORBS2;ARHGAP28;ANK3;PLXDC2;WDR35;BCKDK;MOV10;PEX7;DIAPH2;TMLHE;XK;DLG3;P4HA1;PSAT1;CSPG5;FAM98B;FAR2;ZMYND11;ACTR10;SRSF8;PFN2
GATA6 (human)	40/1447	0.0219192	0.883725	1.33427e-05	0.000270666	-1.66255	6.3516	GABRB3;BEX4;CUL1;CASC4;HMGB1;KLHL13;SLAIN1;SLC8A1;AFF2;FUT8;NHSL1;TUBA1A;TCEAL4;SESN1;NEK1;EMB;GPM6B;PDK1;SH3D19;CA12;NEK9;NIPSNAP3A;SRD5A3;ATP11C;AMMECR1;ANK2;SORBS2;ARHGAP28;ZNF75D;THNSL1;WDR35;FERMT1;RNF128;DLG3;P4HA1;ALDH1A2;PNPLA4;KCTD12;ZMYND11;OBSL1
CBEPA (human)	38/1366	0.0230891	0.883725	1.94314e-05	0.000367901	-1.66102	6.25937	GABRB3;MTMR1;FECH;SDC3;ITPR2;NXT2;TMEM164;SOX2;SULT1A1;C15ORF59;GYS1;RASSF5;ALX4;PRKACB;UTP14A;ABCD1;GPM6B;CCDC18;SCARA3;SYK;EIF1AX;GALNT1;AMMECR1;ANK2;SORBS2;INHBA;PLXDC2;PBX1;IFT88;DLG3;SUB1;IGDCC3;COL4A5;SFXN2;PLCB1;GAS6;SCN4B;TMEM45A
SP4 (human)	3/42	0.0507403	0.883725	0.0209238	0.0612614	-1.93664	5.7732	CCND1;CBS;SYTL4
MYB (human)	38/1409	0.0348494	0.883725	3.72952e-05	0.000661989	-1.65813	5.56588	STX17;POP1;ZNF292;NRXN3;LIN7A;HMGB1;KLHL13;FAM127C;SLC4A4;PHF6;AFF2;EFEMP1;SESN1;ESD;ENPP2;NCKAP5;PRKACB;IL13RA1;EGLN1;CCDC18;SLC30A9;AGL;LANCL1;AMMECR1;ANK2;SORBS2;ARHGAP28;KLHL4;ANK3;SYTL5;PBX1;EID1;FERMT1;TMX4;CPS1;DLG3;ZMYND11;SRSF8
CBEPB (human)	65/2598	0.029732	0.883725	6.15644e-07	2.91405e-05	-1.55623	5.47098	GABRB3;PI4K2B;HMGB3;SLC7A11;FAM127B;SLC8A1;GYS1;CDH4;GJA1;NHSL1;TUBA1A;NEK1;NEK3;SLC16A9;NCKAP5;PRKACB;SH3D19;IL13RA1;DYNC2H1;ITGA4;LANCL1;ATG10;ANK3;SYTL5;PJA1;EID1;TMX4;TMEM179;PPA2;LOX;MAP7D3;SUB1;TMSB15B;KCTD12;CHMP6;STX17;GYPC;LYPD1;NRXN3;KLHL13;IQGAP2;LTBP1;TMEM165;IFI16;MARVELD1;TSPAN6;RSU1;SLC25A24;EGLN1;SMAD1;CCDC18;CPSF2;TYSND1;SORBS2;ARHGAP28;KLHL4;DCBLD2;FERMT1;ETAA1;XK;CPS1;TMEM98;CC…
SOX2 (human)	3/45	0.0600835	0.883725	0.0247881	0.0711093	-1.87862	5.28271	NHSL1;KDELC2;CETN2
SP1 (human)	37/1406	0.0500418	0.883725	7.75252e-05	0.00100078	-1.64898	4.93852	FAM49A;CEBPA;COL18A1;MEGF6;KHDRBS3;MAOA;CXCR4;BRCC3;SLAIN1;CACNA1H;AMOT;C15ORF59;CACNG8;APH1B;DPYSL4;PITRM1;SIX5;CBS;MARVELD1;TSPAN6;SESN1;RPS6KA2;WDR90;MAN1C1;ABCD1;JUN;MARCKSL1;BNIP3;AHNAK2;AIG1;POU3F2;ABHD15;PFKL;CTDSP1;MEGF8;GAS6;SCN4B
MYOD1 (human)	5/109	0.0667276	0.883725	0.0170733	0.0534514	-1.75415	4.74872	NEK9;DLG3;GPAA1;WDR54;PCK2
JUND (human)	36/1380	0.0583766	0.883725	0.000114978	0.00125591	-1.61386	4.58471	PI4K2B;MTMR1;GYPC;NRXN3;LIN7A;SLC7A11;KLHL13;SLAIN1;NXT2;SLC4A4;AFF2;TMTC4;TCEAL8;GJA1;IFI16;ESD;NCKAP5;SH3D19;NCOA5;ANKRD46;DYNLT1;PLEKHA2;AGL;SRD5A3;PARVA;SORBS2;ARHGAP28;ANK3;RAB10;IFT88;LOX;SNX14;FAR2;ZMYND11;SRSF8;TMEM45A
STAT1 (human)	42/1667	0.0671748	0.883725	6.50459e-05	0.000951345	-1.50439	4.06255	LGALS3BP;CEBPA;COL18A1;STEAP3;GLDC;SDC3;LYPD1;CXCR4;STC1;LIN7A;HMGB1;BRCC3;CELSR2;FAM127B;AMOT;SOX2;NYNRIN;CACNG8;FUT8;DPYSL4;TSPAN6;CYP4V2;PHYHD1;ARL6IP5;RSU1;CHST14;SLC37A4;PDK1;PCK2;C21ORF33;AHNAK2;SYTL5;DUSP9;PBX1;IFT88;TMLHE;CPS1;SUB1;MSRB2;KCTD12;RPP25;TRIB1
JDP2 (human)	38/1488	0.067805	0.883725	0.00011303	0.00125591	-1.50846	4.05946	GYPC;CELF2;STC1;HMGB1;HMMR;FAM127B;SLC8A1;TMTC4;FUT8;NHSL1;EFEMP1;PTER;ALDH1B1;DPYSL4;CBS;MARVELD1;SESN1;SLC37A4;DTD1;UTP14A;AASDHPPT;GPM6B;PCK2;SLC30A9;SYK;AGL;ATG10;BCKDK;MOV10;STAG1;XK;CPS1;SNX14;ARMC4;MXRA8;PNPLA4;FAR2;OBSL1
MIR138 (human)	35/1356	0.0690436	0.883725	0.000174644	0.00165329	-1.51126	4.03962	MTMR1;COL18A1;CALCB;POP1;GRIK5;SDC3;PAPLN;FAM129A;HMGB3;SLAIN1;IQGAP2;PKD2;DOCK11;CACNG8;FUT8;GNG2;UCP2;SCN5A;IKBKE;ABCD1;C21ORF33;MARCKSL1;IDH2;SORBS2;ERLIN2;AIG1;PJA1;SLC16A13;MOV10;PEX7;STAG1;ACTR10;NIT2;FBXL7;PFN2
LEF1 (human)	107/4658	0.0507637	0.883725	4.00919e-09	1.13861e-06	-1.35199	4.02971	PI4K2B;DCLRE1A;STEAP3;POP1;GLDC;ZNF292;IRS4;SLC8A1;AMOT;SOX2;NYNRIN;CDH4;GJA1;EFEMP1;DACH1;FAM162A;RASSF5;WDR90;PHYHD1;ARL6IP5;ENPP2;NEK3;PRKACB;IL13RA1;ALG6;ATP11C;ANK3;SYTL5;SYTL4;EID1;RNF128;MAP7D3;CD109;SUCLG2;PEX11G;SRSF8;PFN2;GYPC;ITPR2;LIN7A;KLHL13;TRMT2B;PCDH19;TMTC4;SULT1A1;FUT8;CHST14;LRRN2;AMMECR1;HMGA2;MAGOHB;FERMT1;MOV10;CPS1;DLG3;TMEM98;FBXL7;GABRB3;PYCRL;CELF2;GRIK5;CETN2;DIS3L;HMG…
STAT3 (human)	66/2759	0.0625056	0.883725	2.26699e-06	6.43824e-05	-1.42272	3.9445	GABRB3;LGALS3BP;STEAP3;MRFAP1L1;GLDC;CELF2;FAM127C;SOX2;DOCK11;EDNRA;GJA1;EFEMP1;DACH1;PTER;RASSF5;CYP4V2;ARL6IP5;FBXO4;SLC25A43;SLC16A9;SLC37A4;IKBKE;SLC30A9;UNC5C;ANK2;ANK3;TMX4;CD109;FIBIN;FAR2;GAS6;ZMYND11;PDZRN3;SRSF8;STX17;LYPD1;ASB13;KLHL13;SLAIN1;PCDH19;LTBP1;TMEM164;TCEAL8;TSPAN6;ADAMTS17;ESD;PGK1;DTD1;GPM6B;TRIM45;SLC25A24;TBC1D8B;CA12;C21ORF33;AGL;AMMECR1;RAB39B;PTPN13;ABHD15;SLC16A13;…
MYOG (human)	36/1404	0.0708746	0.883725	0.000159572	0.00161852	-1.48147	3.92122	LGALS3BP;MRFAP1L1;GYPC;COL14A1;HTRA3;LYPD1;ITPR2;BRCC3;PKD2;ENOX2;FUT8;PGK1;PHGDH;NEK3;IKBKE;TRIM45;LRRN2;PLEKHA2;DENND4A;CTPS2;ANK3;SYTL4;ABHD15;PJA1;DCBLD2;ALDH4A1;RSPH3;MOV10;ETAA1;MAP7D3;PSAT1;TMSB15B;FIBIN;SFXN2;RPP25;SNTB1
HINFP (human)	72/3047	0.0652924	0.883725	1.09522e-06	4.44345e-05	-1.41426	3.85933	GABRB3;PI4K2B;CNTNAP2;COL18A1;SPON1;PYCRL;PLOD2;SLC8A1;C15ORF59;PPP3CA;GYS1;EFEMP1;DACH1;DPYSL4;SIX5;SESN1;MYC;PHGDH;ACADM;ABCD1;SH3D19;ZNF362;IGFBP5;ANK3;SYTL5;POU3F2;PJA1;RNF128;LOX;SUB1;FIBIN;FAR2;TCTA;PLCB1;GAS6;ZMYND11;H6PD;FECH;STX17;GTF3C6;LYPD1;FAM129A;ASB13;CXCR4;STC1;CD99L2;BRCC3;IQGAP2;CENPB;CLN6;CACNA1H;APH1B;ALDH1B1;PITRM1;IFI16;TCEAL4;CBS;GPM6B;EGLN1;AHNAK2;PARVA;KLHL4;PLXDC2;AIG1;P…
POU1F1 (human)	36/1408	0.0731293	0.883725	0.000168361	0.00164878	-1.46484	3.83133	GTF3C6;ASB13;SLC4A4;SLC8A1;AFF2;GJA1;IFI16;SESN1;PHGDH;NCKAP5;PRKACB;SH3D19;EGLN1;DBNL;NIPSNAP3A;AGL;GALNT1;RAB39B;TYSND1;ANK2;SORBS2;KLHL4;ANK3;PTPN13;PJA1;ETAA1;PM20D2;TMLHE;CPS1;ALDH1A2;MSRB2;FIBIN;ZMYND11;MBTPS2;FBXL7;SRSF8
TP53 (human)	68/2866	0.067665	0.883725	2.03435e-06	6.4195e-05	-1.39357	3.75315	FAM49A;POP1;IRS4;PKD2;FAM127B;AFF2;GYS1;RASSF5;SESN1;PHYHD1;ARL6IP5;NEK1;ACADM;SLC37A4;IKBKE;PRKACB;UTP14A;PHYH;SLC30A9;SCARA3;SYK;PRMT3;ALG13;VRK1;NME4;ANK3;SYTL5;TMEM177;SFPQ;PPA2;LOX;CTDSP1;SUB1;SRSF3;FAR2;KCTD12;GAS6;RPP25;ZMYND11;TRIB1;OBSL1;SCN4B;HOMEZ;NLRX1;GYPC;FAM129A;CXXC4;LTBP1;CENPB;TMEM164;SULT1A1;ENOX2;CBS;ADAM23;ADAMTS17;ALX4;ZSWIM5;GPM6B;SLC25A24;C21ORF33;CCDC18;TTC12;HNRNPM;STAG1…
TEAD2 (mouse)	40/1591	0.074681	0.883725	0.000102476	0.00121263	-1.44199	3.74128	FAM49A;GRIK5;CUL1;IRS4;ITPR2;KLHL13;NXT2;NDRG1;CLN6;HS6ST2;TMEM164;CACNA1H;TMTC4;GHR;PPP3CA;TUBA1A;PTER;CCND1;SIX5;RASSF5;UCP2;EMB;ABCD1;GPM6B;JUN;MARCKSL1;CTPS2;HMGA2;ANK2;ARHGAP28;DCBLD2;MOV10;LOX;CTDSP1;DDIT4;MXRA8;COL4A5;MEGF8;TRIB1;OBSL1
ELK1 (human)	38/1511	0.0806388	0.901895	0.000152962	0.00160894	-1.455	3.66337	GABRB3;BEX4;STEAP3;PLOD2;TRMT2B;SLAIN1;PCDH19;PFAS;FAM127B;TMEM165;DOCK11;LDHA;EFEMP1;DPYSL4;TCEAL4;KDELC2;RPS6KA2;ADAMTS17;ENPP2;EIF4EBP2;SLC37A4;TRIM45;EGLN3;NIPSNAP3A;ATG10;ALG13;DUSP9;BCKDK;MOV10;SFPQ;IFT88;TMLHE;CPS1;ARMC4;PADI2;CTNNB1;LGR5;PFN2
RELB (human)	37/1469	0.0825678	0.901895	0.000181965	0.00166704	-1.41518	3.52966	DCLRE1A;STEAP3;GYPC;GPAA1;IQGAP2;PCDH19;CELSR2;CENPB;TMEM165;ENOX2;GYS1;CACNG8;RASSF5;ADAM23;ARL6IP5;ALX4;NEK1;SCN5A;SLC37A4;UTP14A;TTC12;SYK;SLC2A10;LRRN2;RAB39B;ALG13;B3GALT6;VRK1;ANK3;ALDH4A1;DLG3;LOX;CTDSP1;MEGF8;GAS6;SCN4B;SNTB1
BCL6 (human)	35/1399	0.0959762	0.999291	0.000308226	0.0025746	-1.36783	3.20572	BEX4;MTMR1;STX17;GLDC;NRXN3;STC1;KLHL13;PCDH19;AMOT;NYNRIN;FUT8;DACH1;RASSF5;RPS6KA2;ENPP2;SLC25A43;SLC16A9;MGAT2;DTD1;PRKACB;UTP14A;PDK1;TBC1D8B;LANCL1;SLC39A10;SORBS2;SYTL5;ALDH4A1;TMLHE;CPS1;P4HA1;FIBIN;FAM98B;FAR2;ZMYND11
E2F6 (human)	34/1358	0.0990407	0.999291	0.000371051	0.00301082	-1.37499	3.17929	GABRB3;COL18A1;STEAP3;H6PD;FECH;GRIK5;ITPR2;SLAIN1;CELSR2;SLC4A4;CACNA1H;OGFRL1;APH1B;CCND1;KDELC2;CBS;RASSF5;MYC;MAN1C1;SCN5A;ABCD1;SMAD1;C21ORF33;JUN;ZNF362;ERLIN2;ALDH4A1;LOX;C9ORF69;ALDH1A2;DDIT4;CSPG5;MEGF8;PFN2
KLF13 (human)	36/1453	0.10204	0.999291	0.000301885	0.0025746	-1.37208	3.13161	GABRB3;FECH;MAOA;GPAA1;GRIK5;SDC3;PAPLN;CXCR4;KLHL13;CELSR2;FAM127B;AMOT;SELENBP1;SULT1A1;PITRM1;S100A16;SIX5;CBS;MYC;PHYHD1;PHGDH;MGAT2;ABCD1;SCARA3;DYNLT1;LRRN2;DENND4A;ALDH4A1;IFT88;DLG3;TMEM98;CTDSP1;MSRB2;MXRA8;KCTD12;CHMP6
IRF8 (human)	38/1550	0.106099	0.999999	0.000250528	0.00222344	-1.36677	3.06619	CNTNAP2;PAPLN;LYPD1;SLC38A10;KLHL13;NXT2;PCDH19;LTBP1;FAM127B;SLC8A1;TMEM165;TMTC4;SULT1A1;LDHA;GJA1;DACH1;ALDH1B1;RASSF5;WDR90;EMB;ABCD1;PDK1;DBNL;SYK;AMMECR1;THNSL1;PBX1;DCBLD2;ALDH4A1;BMP2;IFT88;LOX;ARMC4;MXRA8;PNPLA4;CXORF57;GAS6;MBTPS2

## Sheet: KEGG_2016 
	Overlap	P-value	Adjusted_P-value	Old_P-value	Old_Adjusted_P-value	Z-score	Combined_Score	Gene_List
74-4 vs control
KEGG_2016	http://amp,pharm,mssm,edu/Enrichr/export?userListId=17280594&filename=temp_out&backgroundType=KEGG_2016
Pathways in cancer_Homo sapiens_hsa05200	25/397	0.000360086	0.0478277	0.00216126	0.315129	-2.10978	16.7288	CEBPA;HDAC2;SLC2A1;CXCR4;FZD10;BRCA2;EDNRA;CASP8;GNG2;MECOM;CDH1;MYC;FADD;PRKACB;EGLN1;JUN;EGLN3;FZD6;FOS;BMP2;KITLG;APC;CTNNB1;COL4A5;PLCB1
Metabolic pathways_Homo sapiens_hsa01100	58/1239	0.000385707	0.0478277	0.00408822	0.315129	-1.98676	15.6168	PI4K2B;PYCRL;PIGN;GBE1;PIGP;XYLT1;CPOX;PFAS;FPGT;PGM2;ACADM;HADH;PGM1;NUDT12;ALG8;PCYT1B;ALG6;OXSM;CTPS2;NDUFS5;CHDH;EHHADH;HMBS;PIGK;UPRT;PLCB1;ST6GALNAC3;FECH;NDUFB3;NDUFB2;NDUFB1;HSD17B12;SDSL;ADH5;LDHA;FUT8;ALDH1B1;MAT2A;TWISTNB;MAN1C1;PGK1;CHSY3;MGAT2;GK;MMAB;AGK;AGL;GALNT1;B3GALT6;ACADSB;COQ5;DHFR;POLA1;COQ2;PFKL;CPS1;POLE2;CDO1
Fatty acid degradation_Homo sapiens_hsa00071	6/44	0.00179369	0.112532	0.00505141	0.315129	-1.8179	11.4955	ALDH1B1;EHHADH;ACADM;HADH;ACADSB;ADH5
Hippo signaling pathway_Homo sapiens_hsa04390	12/153	0.00205608	0.112532	0.00677743	0.315129	-1.66431	10.297	SOX2;SMAD1;BMP2;DLG3;APC;CDH1;ID2;MYC;FZD6;CTNNB1;FZD10;AMOT
Glucagon signaling pathway_Homo sapiens_hsa04922	9/101	0.00309608	0.112532	0.00874744	0.315129	-1.77636	10.2631	PPP3CA;LDHA;PFKL;PDE3B;SLC2A1;PHKB;PLCB1;CALM1;PRKACB
Fatty acid metabolism_Homo sapiens_hsa01212	6/48	0.00282225	0.112532	0.00738189	0.315129	-1.69181	9.93127	OXSM;EHHADH;HSD17B12;ACADM;HADH;ACADSB
Glycolysis / Gluconeogenesis_Homo sapiens_hsa00010	7/67	0.00363006	0.112532	0.00939679	0.315129	-1.76648	9.92497	LDHA;PFKL;ALDH1B1;PGK1;PGM2;ADH5;PGM1
Wnt signaling pathway_Homo sapiens_hsa04310	11/142	0.00341842	0.112532	0.0101655	0.315129	-1.72714	9.80771	VANGL1;PPP3CA;JUN;APC;MYC;FZD6;CUL1;CTNNB1;FZD10;PLCB1;PRKACB
Spliceosome_Homo sapiens_hsa03040	10/134	0.00665392	0.174726	0.0174528	0.379052	-1.59942	8.01718	HNRNPM;SNRPD1;SRSF3;SNRPB2;THOC2;LSM5;MAGOHB;SRSF7;LSM3;SRSF8
Transcriptional misregulation in cancer_Homo sapiens_hsa05202	12/180	0.00757328	0.174726	0.0207882	0.379052	-1.53774	7.50899	CEBPA;SMAD1;HDAC2;FUT8;HPGD;FUS;ID2;MYC;LMO2;HMGA2;PBX1;FLI1
Signaling pathways regulating pluripotency of stem cells_Homo sapiens_hsa04550	10/142	0.00984469	0.186032	0.0244494	0.379052	-1.55442	7.18269	SOX2;SMAD1;BMP2;APC;ID2;MYC;FZD6;CTNNB1;FZD10;INHBA
Porphyrin and chlorophyll metabolism_Homo sapiens_hsa00860	5/42	0.00774996	0.174726	0.0168594	0.379052	-1.33023	6.46499	FECH;MMAB;HMBS;CPOX;BLVRA
TGF-beta signaling pathway_Homo sapiens_hsa04350	7/84	0.0123226	0.186032	0.0267931	0.379052	-1.41999	6.24274	SMAD1;BMP2;ID2;MYC;NOG;CUL1;INHBA
Renin secretion_Homo sapiens_hsa04924	6/64	0.0116018	0.186032	0.0245624	0.379052	-1.37399	6.12332	PPP3CA;EDNRA;PDE3B;PLCB1;CALM1;PRKACB
Peroxisome_Homo sapiens_hsa04146	7/83	0.0115824	0.186032	0.025401	0.379052	-1.32274	5.89711	PEX7;EHHADH;PEX1;FAR2;PEX11G;NUDT12;PAOX
Long-term potentiation_Homo sapiens_hsa04720	6/66	0.0133844	0.186032	0.0277726	0.379052	-1.32602	5.71999	PPP3CA;RPS6KA6;RPS6KA2;PLCB1;CALM1;PRKACB
HTLV-I infection_Homo sapiens_hsa05166	14/258	0.0222707	0.213107	0.0552992	0.464745	-1.36846	5.20628	EGR1;JUN;FZD6;SLC2A1;FZD10;FOS;PPP3CA;KAT2B;APC;POLE2;MYC;CTNNB1;PRKACB;RAN
Valine, leucine and isoleucine degradation_Homo sapiens_hsa00280	5/48	0.0135023	0.186032	0.0270348	0.379052	-1.17614	5.06316	ALDH1B1;EHHADH;ACADM;HADH;ACADSB
Carbon metabolism_Homo sapiens_hsa01200	8/113	0.0192937	0.213107	0.0408351	0.41337	-1.19478	4.71698	PFKL;CPS1;EHHADH;ESD;PGK1;ACADM;SDSL;ADH5
Lysine degradation_Homo sapiens_hsa00310	5/52	0.018621	0.213107	0.0356108	0.41337	-1.10152	4.38784	ALDH1B1;EHHADH;SETMAR;PLOD2;HADH
Alzheimer's disease_Homo sapiens_hsa05010	10/168	0.0284392	0.241554	0.0608063	0.464745	-1.14101	4.06199	PPP3CA;CASP8;NDUFS5;NDUFB3;NDUFB2;NDUFB1;FADD;NAE1;PLCB1;CALM1
N-Glycan biosynthesis_Homo sapiens_hsa00510	5/49	0.0146802	0.191616	0.0290402	0.379052	-0.950452	4.0121	ALG8;FUT8;ALG6;MAN1C1;MGAT2
Melanogenesis_Homo sapiens_hsa04916	7/100	0.0292202	0.241554	0.0564466	0.464745	-1.11862	3.95196	KITLG;FZD6;CTNNB1;FZD10;PLCB1;CALM1;PRKACB
Cell adhesion molecules (CAMs)_Homo sapiens_hsa04514	9/142	0.0257921	0.228444	0.0541977	0.464745	-1.07582	3.93501	CNTNAP2;CDH4;ALCAM;ITGA4;CDH1;SDC3;ITGA8;NRXN3;CNTN1
Pentose phosphate pathway_Homo sapiens_hsa00030	4/29	0.0100869	0.186032	0.0205435	0.379052	-0.842571	3.87289	PFKL;PGM2;PGM1;DERA
Biosynthesis of amino acids_Homo sapiens_hsa01230	6/74	0.0224275	0.213107	0.0433372	0.41337	-0.998781	3.79284	PFKL;CPS1;MAT2A;PYCRL;PGK1;SDSL
HIF-1 signaling pathway_Homo sapiens_hsa04066	7/103	0.0335749	0.268599	0.0636428	0.464745	-1.03628	3.51712	EGLN1;LDHA;PFKL;EGLN3;SLC2A1;PGK1;PDK1
Basal cell carcinoma_Homo sapiens_hsa05217	5/55	0.0232012	0.213107	0.0430305	0.41337	-0.827014	3.11251	BMP2;APC;FZD6;CTNNB1;FZD10
Pathogenic Escherichia coli infection_Homo sapiens_hsa05130	5/55	0.0232012	0.213107	0.0430305	0.41337	-0.771423	2.90329	TUBA1A;CDH1;CTNNB1;ARPC5;TUBB4B
Herpes simplex infection_Homo sapiens_hsa05168	10/185	0.0494939	0.308965	0.0975822	0.537786	-0.895335	2.69129	JUN;CASP8;CUL1;SRSF3;FADD;FOS;TAF9B;IKBKE;SRSF7;SRSF8
75-2 vs control
KEGG_2016	http://amp,pharm,mssm,edu/Enrichr/export?userListId=17280677&filename=temp_out&backgroundType=KEGG_2016
Pathways in cancer_Homo sapiens_hsa05200	21/397	0.000346537	0.0549401	5.6052e-05	0.0116588	-2.10978	16.8097	PDGFRA;ARNT2;CDKN2B;JUN;FZD3;WNT2B;ITGA2;LAMA3;FN1;PLD1;BRCA2;EGFR;AR;EDNRA;CDK6;GNG2;CDH1;COL4A5;SOS1;PRKACB;MET
Focal adhesion_Homo sapiens_hsa04510	13/202	0.000792405	0.0549401	0.000281641	0.0245865	-1.87172	13.3649	PDGFRA;JUN;ITGA2;LAMA3;FN1;TNC;EGFR;COL1A1;COL2A1;ITGA8;COL4A5;SOS1;MET
ECM-receptor interaction_Homo sapiens_hsa04512	8/82	0.000568035	0.0549401	0.000354614	0.0245865	-1.68214	12.5712	COL1A1;COL2A1;ITGA2;LAMA3;FN1;ITGA8;TNC;COL4A5
Proteoglycans in cancer_Homo sapiens_hsa05205	12/203	0.00254277	0.132224	0.000989504	0.0514542	-1.93569	11.5648	FZD3;WNT2B;ITGA2;FN1;ITPR2;ANK2;ANK3;SOS1;PRKACB;MET;ANK1;EGFR
PI3K-Akt signaling pathway_Homo sapiens_hsa04151	16/341	0.00549079	0.163155	0.00157164	0.06538	-1.91148	9.94864	PDGFRA;SYK;ITGA2;LAMA3;FN1;TNC;EGFR;COL1A1;CDK6;GNG2;COL2A1;ITGA8;COL4A5;PCK1;SOS1;MET
Gap junction_Homo sapiens_hsa04540	7/88	0.00402017	0.157792	0.00250045	0.0836292	-1.68276	9.28283	PDGFRA;GUCY1A2;TUBA1A;ITPR2;SOS1;PRKACB;EGFR
Protein digestion and absorption_Homo sapiens_hsa04974	7/90	0.00455168	0.157792	0.00281444	0.0836292	-1.57028	8.46738	COL1A1;COL2A1;COL14A1;COL5A2;COL12A1;COL4A5;SLC8A1
Small cell lung cancer_Homo sapiens_hsa05222	6/86	0.0139436	0.340242	0.0091007	0.210327	-1.66599	7.11832	CDKN2B;CDK6;ITGA2;LAMA3;FN1;COL4A5
GnRH signaling pathway_Homo sapiens_hsa04912	6/91	0.0179936	0.340242	0.0116532	0.220351	-1.66154	6.67562	JUN;ITPR2;PLD1;SOS1;PRKACB;EGFR
Renin secretion_Homo sapiens_hsa04924	5/64	0.0154124	0.340242	0.0110458	0.220351	-1.59749	6.66565	GUCY1A2;ADCYAP1R1;EDNRA;ITPR2;PRKACB
Cell adhesion molecules (CAMs)_Homo sapiens_hsa04514	8/142	0.0164816	0.340242	0.00902841	0.210327	-1.50914	6.19577	CNTNAP2;CDH4;VCAN;ALCAM;CDH1;SDC3;ITGA8;CNTN1
Melanoma_Homo sapiens_hsa05218	5/71	0.0231496	0.352486	0.0162974	0.22599	-1.54947	5.83495	PDGFRA;CDK6;CDH1;MET;EGFR
MAPK signaling pathway_Homo sapiens_hsa04010	11/255	0.0331698	0.405842	0.0149714	0.22599	-1.59043	5.4172	PDGFRA;JUN;RPS6KA6;CACNA2D1;RPS6KA2;ARRB1;MAP3K6;SOS1;PRKACB;EGFR;CACNA1G
Hippo signaling pathway_Homo sapiens_hsa04390	8/153	0.0245516	0.352486	0.0134813	0.22599	-1.42376	5.27787	SOX2;FZD3;BMPR2;WNT2B;DLG3;CDH1;AMOT;GDF7
Axon guidance_Homo sapiens_hsa04360	7/127	0.0267551	0.352486	0.0158614	0.22599	-1.4169	5.13065	EPHA7;DPYSL5;PLXNA1;UNC5C;SEMA4F;SLIT2;MET
Arrhythmogenic right ventricular cardiomyopathy (ARVC)_Homo sapiens_hsa05412	5/74	0.0271143	0.352486	0.0189832	0.246782	-1.30229	4.69828	CACNA2D1;ITGA2;ITGA8;DSG2;SLC8A1
Wnt signaling pathway_Homo sapiens_hsa04310	7/142	0.0447768	0.490188	0.0266676	0.308159	-1.42241	4.4181	VANGL1;JUN;FZD3;WNT2B;DAAM1;PRICKLE2;PRKACB
Calcium signaling pathway_Homo sapiens_hsa04020	8/180	0.0551654	0.513288	0.0309179	0.321546	-1.47892	4.28506	PDGFRA;EDNRA;CCKBR;ITPR2;PRKACB;EGFR;SLC8A1;CACNA1G
TGF-beta signaling pathway_Homo sapiens_hsa04350	5/84	0.043325	0.490188	0.0299848	0.321546	-1.35939	4.26716	CDKN2B;BMPR2;SMAD6;LTBP1;GDF7
Platelet activation_Homo sapiens_hsa04611	6/122	0.0612543	0.513288	0.0393077	0.355417	-1.36209	3.80393	COL1A1;GUCY1A2;SYK;ITGA2;ITPR2;PRKACB
Dilated cardiomyopathy_Homo sapiens_hsa05414	5/90	0.0553383	0.513288	0.0381861	0.355417	-1.29154	3.73808	CACNA2D1;ITGA2;ITGA8;PRKACB;SLC8A1
Dorso-ventral axis formation_Homo sapiens_hsa04320	3/27	0.0230872	0.352486	0.0202764	0.248088	-0.955258	3.59987	NOTCH2;SOS1;EGFR
Glioma_Homo sapiens_hsa05214	4/65	0.0613279	0.513288	0.0457799	0.355417	-1.28101	3.57596	PDGFRA;CDK6;SOS1;EGFR
Circadian entrainment_Homo sapiens_hsa04713	5/95	0.0666762	0.513654	0.0459765	0.355417	-1.18365	3.20522	GUCY1A2;ADCYAP1R1;GNG2;PRKACB;CACNA1G
Pancreatic cancer_Homo sapiens_hsa05212	4/66	0.064161	0.513288	0.0478445	0.355417	-1.12406	3.08708	CDK6;PLD1;BRCA2;EGFR
MicroRNAs in cancer_Homo sapiens_hsa05206	11/297	0.0801227	0.532075	0.038692	0.355417	-1.18392	2.98844	NOTCH2;PDGFRA;FZD3;BMPR2;CDK6;TNC;HMGA2;CYP1B1;SOS1;MET;EGFR
Long-term potentiation_Homo sapiens_hsa04720	4/66	0.064161	0.513288	0.0478445	0.355417	-1.07746	2.95909	RPS6KA6;RPS6KA2;ITPR2;PRKACB
Estrogen signaling pathway_Homo sapiens_hsa04915	5/99	0.0766083	0.532075	0.0528446	0.356069	-1.13536	2.9168	JUN;ITPR2;SOS1;PRKACB;EGFR
Renal cell carcinoma_Homo sapiens_hsa05211	4/66	0.064161	0.513288	0.0478445	0.355417	-1.02427	2.813	ARNT2;JUN;SOS1;MET
Amoebiasis_Homo sapiens_hsa05146	5/100	0.0792096	0.532075	0.0546504	0.356069	-1.05872	2.68456	COL1A1;LAMA3;FN1;COL4A5;PRKACB
WikiPathways_2016	http://amp,pharm,mssm,edu/Enrichr/export?userListId=17280677&filename=temp_out&backgroundType=WikiPathways_2016
XPodNet - protein-protein interactions in the podocyte expanded by STRING_Mus musculus_WP2309	42/808	6.66715e-07	0.000167346	2.48731e-06	0.000624315	-2.22952	31.7058	NOTCH2;RAB3B;ADCYAP1R1;BMPR2;ARRB1;LIN7A;NID2;LTBP1;CDH4;EDNRA;TUBA1A;CDH1;MAP2;CHN2;PLXNA1;STXBP5;PRKACB;MYH10;ATP9A;ARNT2;ZHX3;SYK;IGFBP3;ITGA2;FN1;SULF1;PTPN13;SMAD6;SYTL4;VANGL1;SDK1;CDK6;FRAS1;RNF128;ADAM12;ITGA8;FAT1;COL4A5;UTRN;SOS1;MET;SNTB1
Focal Adhesion_Mus musculus_WP85	13/185	0.000344976	0.0391858	0.000948799	0.104556	-2.0859	16.6289	PDGFRA;JUN;ITGA2;LAMA3;FN1;TNC;EGFR;COL1A1;COL2A1;COL5A2;ITGA8;SOS1;MET
Focal Adhesion_Homo sapiens_WP306	13/191	0.000468356	0.0391858	0.00124967	0.104556	-2.12272	16.2734	PDGFRA;JUN;ITGA2;LAMA3;FN1;TNC;EGFR;COL1A1;COL2A1;COL5A2;ITGA8;SOS1;MET
PodNet: protein-protein interactions in the podocyte_Mus musculus_WP2310	16/305	0.00185136	0.116173	0.00450373	0.250935	-2.08372	13.1104	NOTCH2;ZHX3;IGFBP3;ITGA2;SULF1;SMAD6;NID2;VANGL1;SDK1;FRAS1;FAT1;COL4A5;UTRN;PRKACB;MET;MYH10
Signaling Pathways in Glioblastoma_Homo sapiens_WP2261	7/83	0.00289683	0.121184	0.00590213	0.250935	-2.11695	12.3718	PDGFRA;CDKN2B;CDK6;PRKCH;BRCA2;MET;EGFR
ESC Pluripotency Pathways_Mus musculus_WP339	8/117	0.00545525	0.171159	0.010562	0.331383	-1.9583	10.205	PDGFRA;JUN;FZD3;BMPR2;WNT2B;SMAD6;SOS1;EGFR
Nanoparticle-mediated activation of receptor signaling_Homo sapiens_WP2643	4/28	0.00356622	0.127874	0.00699818	0.250935	-1.71585	9.67097	COL1A1;FN1;SOS1;EGFR
Integrated Breast Cancer Pathway_Homo sapiens_WP1984	9/155	0.00941411	0.205078	0.0175916	0.372598	-1.93585	9.03181	AR;JUN;BMPR2;APOBEC3G;CDH1;BRCA2;SMAD6;EGFR;HIPK2
Myometrial Relaxation and Contraction Pathways_Mus musculus_WP385	9/151	0.00799972	0.205078	0.0151889	0.372598	-1.85857	8.97382	JUN;PRKCH;GNG2;IGFBP5;IGFBP3;ITPR2;ARRB1;PRKACB;SLC8A1
Estrogen Receptor Pathway_Homo sapiens_WP2881	3/13	0.00285778	0.121184	0.00617524	0.250935	-1.50884	8.83837	JUN;CYP1B1;PCK1
Myometrial Relaxation and Contraction Pathways_Homo sapiens_WP289	9/156	0.00979551	0.205078	0.0182335	0.372598	-1.82989	8.46476	JUN;PRKCH;GNG2;IGFBP5;IGFBP3;ITPR2;ARRB1;PRKACB;SLC8A1
Integrated Pancreatic Cancer Pathway_Homo sapiens_WP2377	10/192	0.0131127	0.21942	0.024186	0.404712	-1.91991	8.32122	PDGFRA;AR;CDKN2B;JUN;IGFBP3;BRCA2;SMAD6;SOS1;LTBP1;EGFR
SIDS Susceptibility Pathways_Homo sapiens_WP706	9/160	0.0114386	0.205078	0.0209726	0.376009	-1.75475	7.84507	SOX2;AR;JUN;ADCYAP1R1;MAOA;MAP2;SCN5A;PRKACB;PBX1
Delta-Notch Signaling Pathway_Mus musculus_WP265	6/81	0.0105772	0.205078	0.0184028	0.372598	-1.67454	7.61756	NOTCH2;SPEN;JUN;FHL1;CNTN1;EGFR
Wnt Signaling Pathway NetPath_Mus musculus_WP539	7/106	0.0109049	0.205078	0.0192979	0.372598	-1.64162	7.41774	JUN;LRP1;DAAM1;CDH1;MAGI3;ARRB1;HIPK2
Focal Adhesion-PI3K-Akt-mTOR-signaling pathway_Mus musculus_WP2841	13/303	0.0226732	0.284549	0.0418185	0.464167	-1.8427	6.97753	PDGFRA;ITGA2;LAMA3;FN1;TNC;EGFR;COL1A1;GNG2;COL2A1;COL5A2;ITGA8;SOS1;MET
Wnt Signaling Pathway_Homo sapiens_WP428	5/67	0.0184763	0.284549	0.0296993	0.456914	-1.54532	6.16778	JUN;FZD3;WNT2B;PRKCH;KREMEN1
Calcium Regulation in the Cardiac Cell_Mus musculus_WP553	8/150	0.0221221	0.284549	0.0372793	0.464167	-1.56919	5.98046	GNAZ;PRKCH;GNG2;ITPR2;ARRB1;PRKACB;SLC8A1;CACNA1G
Aryl Hydrocarbon Receptor_Homo sapiens_WP2586	4/46	0.0206227	0.284549	0.0321143	0.456914	-1.36602	5.30202	PLAGL1;LPL;CYP1B1;EGFR
Insulin Signaling_Homo sapiens_WP481	8/160	0.0309337	0.308416	0.0504598	0.464167	-1.40113	4.87021	JUN;RPS6KA6;PRKCH;RPS6KA2;IRS4;ENPP1;MAP3K6;SOS1
TGF-beta Signaling Pathway_Homo sapiens_WP366	7/132	0.0320861	0.308416	0.0510422	0.464167	-1.34229	4.61657	CDKN2B;JUN;ITGA2;FN1;TNC;SOS1;MET
Arrhythmogenic Right Ventricular Cardiomyopathy_Homo sapiens_WP2118	5/75	0.0285259	0.308416	0.0438477	0.464167	-1.19324	4.2443	CACNA2D1;ITGA2;ITGA8;DSG2;SLC8A1
Mesodermal Commitment Pathway_Homo sapiens_WP2857	5/76	0.0299832	0.308416	0.0458574	0.464167	-1.20379	4.22183	SOX2;MACF1;BMPR2;HMGA2;SMAD6
Senescence and Autophagy in Cancer_Homo sapiens_WP615	6/105	0.0334288	0.308416	0.0517796	0.464167	-1.2377	4.20611	COL1A1;JUN;GSN;IGFBP5;IGFBP3;FN1
Calcium Regulation in the Cardiac Cell_Homo sapiens_WP536	7/149	0.0553464	0.386822	0.0835128	0.54733	-1.14461	3.31265	GNAZ;PRKCH;GNG2;ITPR2;ARRB1;PRKACB;SLC8A1
Wnt Signaling Pathway_Mus musculus_WP403	4/58	0.0434175	0.340556	0.0624697	0.489997	-0.999892	3.13655	JUN;FZD3;WNT2B;PRKCH
SIDS Susceptibility Pathways_Mus musculus_WP1266	4/59	0.0457682	0.348116	0.0655041	0.498228	-0.96265	2.96897	AR;ADCYAP1R1;MAOA;SCN5A
Melatonin metabolism and effects_Homo sapiens_WP3298	3/28	0.0254297	0.303946	0.0380976	0.464167	-0.742065	2.72474	MAOA;MAP2;CYP1B1
Insulin Signaling_Mus musculus_WP65	7/154	0.0637724	0.393717	0.0949085	0.548468	-0.979142	2.69502	JUN;RPS6KA6;PRKCH;RPS6KA2;ENPP1;MAP3K6;SOS1
Signaling of Hepatocyte Growth Factor Receptor_Homo sapiens_WP313	3/34	0.0420434	0.340416	0.0593569	0.480599	-0.835394	2.64741	JUN;SOS1;MET
77-1 vs control
KEGG_2016	http://amp,pharm,mssm,edu/Enrichr/export?userListId=17280826&filename=temp_out&backgroundType=KEGG_2016
Renin secretion_Homo sapiens_hsa04924	8/64	0.00156546	0.311801	0.00259152	0.405393	-1.89549	12.244	GUCY1A3;PPP3CA;ADCYAP1R1;EDNRA;PDE3B;ADORA1;PLCB1;PRKACB
Pathways in cancer_Homo sapiens_hsa05200	24/397	0.00595907	0.341812	0.00684207	0.405393	-2.0297	10.3978	LAMA5;ARNT2;CEBPA;FZD6;CXCR4;BRCA2;FGF5;BMP2;EDNRA;CASP8;CDK6;GNG2;MECOM;APC;CDH1;RASSF5;MYC;COL4A6;COL4A5;EP300;FADD;PLCB1;PRKACB;NKX3-1
Wnt signaling pathway_Homo sapiens_hsa04310	12/142	0.00383723	0.311801	0.00524639	0.405393	-1.85411	10.3144	VANGL1;CAMK2B;PPP3CA;APC;BAMBI;MYC;FZD6;CUL1;EP300;PLCB1;PRKACB;NKD1
Biosynthesis of amino acids_Homo sapiens_hsa01230	8/74	0.00394684	0.311801	0.00580428	0.405393	-1.70713	9.44871	CPS1;MAT2A;PYCRL;CBS;PSAT1;SDSL;BCAT1;PSPH
TGF-beta signaling pathway_Homo sapiens_hsa04350	8/84	0.00846641	0.341812	0.0114154	0.484254	-1.75331	8.36617	SMAD1;BMP2;BAMBI;ID2;MYC;CUL1;EP300;LTBP1
Glycine, serine and threonine metabolism_Homo sapiens_hsa00260	5/40	0.0117486	0.377212	0.0163461	0.484254	-1.59328	7.08055	CBS;PSAT1;CHDH;SDSL;PSPH
Axon guidance_Homo sapiens_hsa04360	10/127	0.0127329	0.377212	0.0160214	0.484254	-1.59676	6.96759	PPP3CA;EFNB1;SEMA6A;SEMA3A;SEMA3G;CXCR4;PLXNA1;UNC5C;SEMA3E;SLIT2
Hippo signaling pathway_Homo sapiens_hsa04390	11/153	0.0173457	0.456771	0.0210316	0.553832	-1.54404	6.26016	SOX2;SMAD1;BMP2;DLG3;APC;CDH1;ID2;MYC;FZD6;NKD1;AMOT
Long-term potentiation_Homo sapiens_hsa04720	6/66	0.0262224	0.478055	0.0324423	0.591449	-1.46805	5.34537	CAMK2B;PPP3CA;RPS6KA2;EP300;PLCB1;PRKACB
Glycosaminoglycan biosynthesis - heparan sulfate / heparin_Homo sapiens_hsa00534	4/24	0.00865346	0.341812	0.0131875	0.484254	-1.12351	5.33644	NDST1;HS6ST1;HS6ST2;HS6ST3
ECM-receptor interaction_Homo sapiens_hsa04512	7/82	0.0232083	0.478055	0.028659	0.591449	-1.4087	5.30129	LAMA5;ITGA8;TNC;DAG1;COL4A6;COL4A5;AGRN
Notch signaling pathway_Homo sapiens_hsa04330	5/48	0.0244396	0.478055	0.0310191	0.591449	-1.27297	4.7247	NOTCH2;DTX3L;PSEN2;EP300;DTX4
Glucagon signaling pathway_Homo sapiens_hsa04922	7/101	0.0606331	0.880151	0.0687565	0.913753	-1.52426	4.27237	CAMK2B;PPP3CA;PDE3B;EP300;PLCB1;PRKACB;ACACB
Herpes simplex infection_Homo sapiens_hsa05168	11/185	0.0567981	0.880151	0.0631365	0.913753	-1.46746	4.20903	SP100;RNASEL;CASP8;OAS3;CUL1;EP300;SRSF3;FADD;IKBKE;TLR3;SRSF8
Other types of O-glycan biosynthesis_Homo sapiens_hsa00514	4/31	0.0211996	0.478055	0.0281486	0.591449	-1.04059	4.01018	POGLUT1;POFUT1;CHST10;FUT4
Aminoacyl-tRNA biosynthesis_Homo sapiens_hsa00970	5/66	0.0776354	0.880151	0.0876415	0.913753	-1.41115	3.60653	AARS2;MARS;DARS2;IARS;FARS2
Peroxisome_Homo sapiens_hsa04146	6/83	0.0673148	0.880151	0.076268	0.913753	-1.26151	3.40403	AMACR;PMVK;NUDT19;ACOX3;MLYCD;PAOX
Cysteine and methionine metabolism_Homo sapiens_hsa00270	4/45	0.0690991	0.880151	0.0797497	0.913753	-1.06579	2.84802	MAT2A;CBS;SDSL;BCAT1
Endocrine and other factor-regulated calcium reabsorption_Homo sapiens_hsa04961	4/47	0.0784722	0.880151	0.0894423	0.913753	-1.07516	2.73629	VDR;PLCB1;PRKACB;SLC8A1
Circadian entrainment_Homo sapiens_hsa04713	6/95	0.110878	0.880151	0.120818	0.913753	-1.21308	2.66795	GUCY1A3;CAMK2B;ADCYAP1R1;GNG2;PLCB1;PRKACB
Protein digestion and absorption_Homo sapiens_hsa04974	6/90	0.091283	0.880151	0.100926	0.913753	-1.09188	2.61374	COL18A1;COL14A1;COL5A2;COL4A6;COL4A5;SLC8A1
Thyroid hormone signaling pathway_Homo sapiens_hsa04919	7/118	0.114536	0.880151	0.123916	0.913753	-1.16392	2.52206	NOTCH2;NCOA1;THRB;MYC;EP300;PLCB1;PRKACB
cGMP-PKG signaling pathway_Homo sapiens_hsa04022	9/167	0.125283	0.880151	0.133729	0.913753	-1.16266	2.41504	GUCY1A3;PPP3CA;EDNRA;PDE3B;ADORA1;IRS4;PLCB1;ADRA1A;SLC8A1
Signaling pathways regulating pluripotency of stem cells_Homo sapiens_hsa04550	8/142	0.119271	0.880151	0.128164	0.913753	-1.10542	2.35052	SOX2;SMAD1;BMP2;APC;ID2;MYC;KAT6A;FZD6
RIG-I-like receptor signaling pathway_Homo sapiens_hsa04622	5/70	0.0942912	0.880151	0.104704	0.913753	-0.988226	2.33356	CYLD;CASP8;TRIM25;FADD;IKBKE
Fatty acid metabolism_Homo sapiens_hsa01212	4/48	0.0833842	0.880151	0.0944918	0.913753	-0.928219	2.30597	OXSM;ELOVL2;ACOX3;ACADSB
Hepatitis B_Homo sapiens_hsa05161	8/146	0.133585	0.880151	0.142535	0.913753	-1.09523	2.20472	CASP8;CDK6;MYC;PTK2B;EP300;FADD;IKBKE;TLR3
Adrenergic signaling in cardiomyocytes_Homo sapiens_hsa04261	8/148	0.141056	0.880151	0.150011	0.913753	-0.984848	1.92892	CAMK2B;CACNG8;SCN5A;PLCB1;PRKACB;SCN4B;ADRA1A;SLC8A1
Calcium signaling pathway_Homo sapiens_hsa04020	9/180	0.171776	0.880151	0.180125	0.913753	-0.974782	1.71714	CAMK2B;PPP3CA;EDNRA;CCKBR;PTK2B;PLCB1;PRKACB;ADRA1A;SLC8A1
Mineral absorption_Homo sapiens_hsa04978	4/51	0.0989918	0.880151	0.110421	0.913753	-0.716321	1.65665	VDR;SLC40A1;HMOX2;SLC8A1
80-1 control
KEGG_2016	http://amp,pharm,mssm,edu/Enrichr/export?userListId=17280842&filename=temp_out&backgroundType=KEGG_2016
Carbon metabolism_Homo sapiens_hsa01200	11/113	1.59577e-05	0.00373411	0.000115802	0.0270977	-1.71224	18.9126	PFKL;H6PD;CPS1;PSAT1;GLDC;IDH2;ESD;PGK1;SUCLG2;PHGDH;ACADM
Glycine, serine and threonine metabolism_Homo sapiens_hsa00260	6/40	0.000129495	0.0101006	0.000572049	0.0446198	-1.83228	16.4023	MAOA;CBS;PSAT1;GLDC;CHDH;PHGDH
Biosynthesis of amino acids_Homo sapiens_hsa01230	8/74	0.000109795	0.0101006	0.000532572	0.0446198	-1.73933	15.8573	PFKL;CPS1;PYCRL;CBS;PSAT1;IDH2;PGK1;PHGDH
Glucagon signaling pathway_Homo sapiens_hsa04922	9/101	0.000186065	0.0108848	0.000882317	0.0516156	-1.83238	15.7391	PPP3CA;GYS1;LDHA;PFKL;SLC2A1;ITPR2;PLCB1;PRKACB;PCK2
Pathways in cancer_Homo sapiens_hsa05200	17/397	0.00267481	0.073782	0.0133198	0.283348	-1.94962	11.5493	EGLN1;ARNT2;CEBPA;JUN;EGLN3;SLC2A1;CXCR4;BMP2;EDNRA;GNG2;CCND1;RASSF5;MYC;CTNNB1;COL4A5;PLCB1;PRKACB
Wnt signaling pathway_Homo sapiens_hsa04310	9/142	0.00218618	0.073782	0.00757694	0.237866	-1.75254	10.7353	PPP3CA;JUN;CCND1;MYC;CUL1;CTNNB1;PLCB1;PRKACB;CXXC4
Peroxisome_Homo sapiens_hsa04146	7/83	0.00132872	0.062184	0.00437189	0.204604	-1.59824	10.586	PEX7;PHYH;IDH2;NUDT19;FAR2;PEX11G;ABCD1
Metabolic pathways_Homo sapiens_hsa01100	39/1239	0.00315308	0.073782	0.0308439	0.361942	-1.78809	10.2983	PI4K2B;MTMR1;H6PD;FECH;PYCRL;MAOA;GPAA1;GLDC;PFAS;LDHA;FUT8;ALDH1B1;CBS;MAN1C1;PGK1;PHGDH;ACADM;MGAT2;PCK2;ALG6;AGL;GALNT1;IDH2;CTPS2;ALG13;B3GALT6;NME4;ALDH4A1;POLA1;COQ2;PFKL;CPS1;P4HA1;PSAT1;ALDH1A2;CHDH;SUCLG2;HPRT1;PLCB1
Arginine and proline metabolism_Homo sapiens_hsa00330	5/50	0.00309128	0.073782	0.00813217	0.237866	-1.53294	8.85915	ALDH4A1;ALDH1B1;P4HA1;PYCRL;MAOA
N-Glycan biosynthesis_Homo sapiens_hsa00510	5/49	0.0028275	0.073782	0.00752877	0.237866	-1.46263	8.58322	FUT8;ALG6;MAN1C1;ALG13;MGAT2
HIF-1 signaling pathway_Homo sapiens_hsa04066	7/103	0.00452643	0.0882655	0.0127588	0.283348	-1.54745	8.35285	EGLN1;LDHA;PFKL;EGLN3;SLC2A1;PGK1;PDK1
Arrhythmogenic right ventricular cardiomyopathy (ARVC)_Homo sapiens_hsa05412	6/74	0.00354822	0.0754803	0.00971288	0.252535	-1.475	8.32095	CACNG8;GJA1;ITGA4;ITGA8;CTNNB1;SLC8A1
TGF-beta signaling pathway_Homo sapiens_hsa04350	6/84	0.00660113	0.11882	0.0167181	0.326002	-1.5109	7.58548	SMAD1;BMP2;MYC;CUL1;INHBA;LTBP1
Renin secretion_Homo sapiens_hsa04924	5/64	0.00887866	0.139337	0.0203808	0.330853	-1.41124	6.66684	PPP3CA;EDNRA;ITPR2;PLCB1;PRKACB
Long-term potentiation_Homo sapiens_hsa04720	5/66	0.0100785	0.139337	0.0227742	0.330853	-1.39703	6.42264	PPP3CA;RPS6KA2;ITPR2;PLCB1;PRKACB
Renal cell carcinoma_Homo sapiens_hsa05211	5/66	0.0100785	0.139337	0.0227742	0.330853	-1.38232	6.35503	EGLN1;ARNT2;JUN;EGLN3;SLC2A1
Glycolysis / Gluconeogenesis_Homo sapiens_hsa00010	5/67	0.0107182	0.139337	0.0240363	0.330853	-1.37546	6.23885	LDHA;PFKL;ALDH1B1;PGK1;PCK2
Central carbon metabolism in cancer_Homo sapiens_hsa05230	5/67	0.0107182	0.139337	0.0240363	0.330853	-1.33821	6.06989	LDHA;PFKL;MYC;SLC2A1;PDK1
Hippo signaling pathway_Homo sapiens_hsa04390	8/153	0.0116753	0.141579	0.0309353	0.361942	-1.30349	5.8009	SOX2;SMAD1;BMP2;CCND1;DLG3;MYC;CTNNB1;AMOT
AMPK signaling pathway_Homo sapiens_hsa04152	7/124	0.0121008	0.141579	0.0301716	0.361942	-1.30601	5.76535	RAB10;GYS1;PFKL;CCND1;STRADB;IRS4;PCK2
Signaling pathways regulating pluripotency of stem cells_Homo sapiens_hsa04550	7/142	0.0236937	0.237005	0.0542124	0.48228	-1.28003	4.79058	SOX2;SMAD1;BMP2;MYC;CTNNB1;INHBA;DUSP9
Serotonergic synapse_Homo sapiens_hsa04726	6/112	0.0245703	0.237005	0.0528883	0.48228	-1.25008	4.63305	GABRB3;GNG2;MAOA;ITPR2;PLCB1;PRKACB
Glutamatergic synapse_Homo sapiens_hsa04724	6/114	0.0265138	0.238624	0.056528	0.48228	-1.25312	4.54893	PPP3CA;GNG2;GRIK5;ITPR2;PLCB1;PRKACB
Thyroid hormone signaling pathway_Homo sapiens_hsa04919	6/118	0.0307006	0.255306	0.0642511	0.48228	-1.16392	4.05449	CCND1;MYC;SLC2A1;CTNNB1;PLCB1;PRKACB
Oxytocin signaling pathway_Homo sapiens_hsa04921	7/158	0.0390152	0.276653	0.0835271	0.536719	-1.13465	3.6806	PPP3CA;JUN;CACNG8;CCND1;ITPR2;PLCB1;PRKACB
Gap junction_Homo sapiens_hsa04540	5/88	0.0311234	0.255306	0.0612984	0.48228	-0.999807	3.46913	GJA1;TUBA1A;ITPR2;PLCB1;PRKACB
Dilated cardiomyopathy_Homo sapiens_hsa05414	5/90	0.033829	0.255306	0.0659528	0.48228	-1.0192	3.45145	CACNG8;ITGA4;ITGA8;PRKACB;SLC8A1
Dopaminergic synapse_Homo sapiens_hsa04728	6/129	0.0443626	0.284212	0.0885393	0.536719	-0.986646	3.07376	PPP3CA;GNG2;MAOA;ITPR2;PLCB1;PRKACB
Protein digestion and absorption_Homo sapiens_hsa04974	5/90	0.033829	0.255306	0.0659528	0.48228	-0.822783	2.7863	COL18A1;COL5A1;COL14A1;COL4A5;SLC8A1
Colorectal cancer_Homo sapiens_hsa05210	4/62	0.0349136	0.255306	0.0636855	0.48228	-0.783703	2.62923	JUN;CCND1;MYC;CTNNB1
